# Supplementary material
Source: publisher site journal article supplement (http://www.spandidos-publications.com/60/downloadSupplementary)
Supplement: Supplementary file 1 [file downloadSupplementary]

## Sheet: topblast
Table SII. GO annotation analysis of differentially expressed proteins in the 1 h/0 h group.
Sequence name	Sequence desc.	Sequence length	Hit desc.	Hit ACC	E-Value	Similarity	Bit-Score	Alignment length	Positives
P60524	HBB_CHRBRHemoglobin subunit beta OS=Chrysocyon brachyurus GN=HBB PE=1 SV=1	146	sp|P60526|HBB_CHRBRHemoglobin subunit beta OS=Chrysocyon brachyurus GN=HBB PE=1 SV=1	P60526	1.62469e-102	100	298.13	146	146
P60529	HBA_CANLFHemoglobin subunit alpha OS=Canis lupus familiaris GN=HBA PE=1 SV=1	141	sp|P60529|HBA_CANLFHemoglobin subunit alpha OS=Canis lupus familiaris GN=HBA PE=1 SV=1	P60529	1.2284e-97	100	285.419	141	141
J9JHF7	HBA_CANLAHemoglobin subunit alpha OS=Canis latrans GN=HBA PE=1 SV=2	142	tr|J9JHF7|J9JHF7_CANLFUncharacterized protein OS=Canis lupus familiaris GN=LOC100855540 PE=3 SV=1	J9JHF7	7.00044e-99	100	288.5	142	142
J9JHZ3	HBB_CHRBRHemoglobin subunit beta OS=Chrysocyon brachyurus GN=HBB PE=1 SV=1	152	tr|J9JHZ3|J9JHZ3_CANLFUncharacterized protein OS=Canis lupus familiaris PE=3 SV=1	J9JHZ3	2.64749e-109	100	315.849	152	152
E2R5U8	E2R5U8_CANLFTransthyretin OS=Canis lupus familiaris GN=TTR PE=3 SV=1	147	tr|E2R5U8|E2R5U8_CANLFTransthyretin OS=Canis lupus familiaris GN=TTR PE=3 SV=1	E2R5U8	9.38467e-103	100	298.901	147	147
F1PGS2	F1PGS2_CANLFFibrinogen beta chain OS=Canis lupus familiaris GN=FGB PE=4 SV=2	491	tr|F1PGS2|F1PGS2_CANLFFibrinogen beta chain OS=Canis lupus familiaris GN=FGB PE=4 SV=2	F1PGS2	0	100	1033.09	491	491
F1P8G0	F1P8G0_CANLFFibrinogen gamma chain OS=Canis lupus familiaris GN=FGG PE=4 SV=2	437	tr|F1P8G0|F1P8G0_CANLFFibrinogen gamma chain OS=Canis lupus familiaris GN=FGG PE=4 SV=2	F1P8G0	0	100	916.761	437	437
F1P6H7	F1P6H7_CANLFFibronectin OS=Canis lupus familiaris GN=FN1 PE=4 SV=2	2426	tr|F1P6H7|F1P6H7_CANLFFibronectin OS=Canis lupus familiaris GN=FN1 PE=4 SV=2	F1P6H7	0	100	4999.49	2426	2426
F1PBL4	F1PBL4_CANLFFibrinogen alpha chain OS=Canis lupus familiaris GN=FGA PE=4 SV=1	892	tr|F1PBL4|F1PBL4_CANLFFibrinogen alpha chain OS=Canis lupus familiaris GN=FGA PE=4 SV=1	F1PBL4	0	100	1833.92	892	892
P02677	G1MJH9_AILMEUncharacterized protein OS=Ailuropoda melanoleuca GN=FGB PE=4 SV=1	31	tr|G1MJH9|G1MJH9_AILMEUncharacterized protein OS=Ailuropoda melanoleuca GN=FGB PE=4 SV=1	G1MJH9	1.96196e-06	77	47.7506	35	27
F1PDY8	M1EKL8_MUSPFCarbonic anhydrase II (Fragment) OS=Mustela putorius furo PE=2 SV=1	260	tr|F1PDY8|F1PDY8_CANLFUncharacterized protein OS=Canis lupus familiaris GN=CA2 PE=4 SV=2	F1PDY8	0	100	543.502	260	260
J9NWJ5	J9NWJ5_CANLFThioredoxin OS=Canis lupus familiaris GN=TXN PE=3 SV=1	101	tr|J9NWJ5|J9NWJ5_CANLFThioredoxin OS=Canis lupus familiaris GN=TXN PE=3 SV=1	J9NWJ5	5.56575e-68	100	206.838	101	101
J9NVT1	L8B4I8_HUMANUbiquitin C OS=Homo sapiens GN= PE=4 SV=1	381	tr|F7G432|F7G432_CALJAUncharacterized protein (Fragment) OS=Callithrix jacchus GN=LOC100389688 PE=4 SV=1	F7G432	0	100	754.207	381	381
J9NVE9	J9NVE9_CANLFSerum amyloid A OS=Canis lupus familiaris GN=LOC102155886 PE=3 SV=1	130	tr|J9NVE9|J9NVE9_CANLFSerum amyloid A protein OS=Canis lupus familiaris GN=LOC102155886 PE=3 SV=1	J9NVE9	2.39204e-92	100	271.166	130	130
J9P9B9	L9JM01_TUPCHIg kappa chain V-II region RPMI 6410 OS=Tupaia chinensis GN=TREES_T100021696 PE=4 SV=1	126	tr|J9P9B9|J9P9B9_CANLFUncharacterized protein OS=Canis lupus familiaris PE=4 SV=1	J9P9B9	6.8171e-88	100	259.225	126	126
F1PBK6	V9HWE3_HUMANCarbonic anhydrase isoform CRA_a OS=Homo sapiens GN=HEL-S-11 PE=2 SV=1	261	tr|F1PBK6|F1PBK6_CANLFUncharacterized protein OS=Canis lupus familiaris GN=CA1 PE=4 SV=2	F1PBK6	0	100	538.11	261	261
F1P6P2	A0A091CME3_FUKDATransgelin OS=Fukomys damarensis GN=H920_20495 PE=3 SV=1	199	tr|A0A091CME3|A0A091CME3_FUKDATransgelin OS=Fukomys damarensis GN=H920_20495 PE=3 SV=1	A0A091CME3	6.53493e-146	100	412.535	199	199
E2QUY2	G5AUD5_HETGACostars family ABRACL OS=Heterocephalus glaber GN=ABRACL PE=4 SV=1	81	tr|E2QUY2|E2QUY2_CANLFUncharacterized protein OS=Canis lupus familiaris GN=ABRACL PE=4 SV=1	E2QUY2	8.42317e-51	100	161.77	81	81
J9P0D4	J9P0D4_CANLFUncharacterized protein OS=Canis lupus familiaris PE=4 SV=1	141	tr|J9P0D4|J9P0D4_CANLFUncharacterized protein OS=Canis lupus familiaris PE=4 SV=1	J9P0D4	6.50274e-99	100	288.5	141	141
F1PYZ1	gamma A (Fragment) OS=Mustela putorius furo PE=2 SV=1	149	tr|F1PYZ1|F1PYZ1_CANLFUncharacterized protein OS=Canis lupus familiaris GN=LOC485255 PE=3 SV=2	F1PYZ1	6.02438e-107	100	309.686	149	149
F1PTY1	type II cytoskeletal 1 OS=Canis lupus familiaris GN=KRT1 PE=3 SV=1	619	tr|F1PTY1|F1PTY1_CANLFKeratin, type II cytoskeletal 1 OS=Canis lupus familiaris GN=KRT1 PE=3 SV=1	F1PTY1	0	100	1200.65	619	619
Q9MZD3	Q9MZD3_CANLFPeptidyl-prolyl cis-trans isomerase (Fragment) OS=Canis lupus familiaris PE=2 SV=1	156	tr|Q9MZD3|Q9MZD3_CANLFPeptidyl-prolyl cis-trans isomerase (Fragment) OS=Canis lupus familiaris PE=2 SV=1	Q9MZD3	3.50165e-111	100	320.857	156	156
J9NU05	LDHB_PANTRL-lactate dehydrogenase B chain OS=Pan troglodytes GN=LDHB PE=2 SV=1	331	tr|J9NU05|J9NU05_CANLFUncharacterized protein OS=Canis lupus familiaris GN=LDHB PE=3 SV=1	J9NU05	0	100	677.552	331	331
E2R2C3	E2R2C3_CANLFGlucose-6-phosphate isomerase OS=Canis lupus familiaris GN=GPI PE=3 SV=1	558	tr|E2R2C3|E2R2C3_CANLFGlucose-6-phosphate isomerase OS=Canis lupus familiaris GN=GPI PE=3 SV=1	E2R2C3	0	100	1164.83	558	558
F1Q0N9	A0A0K2A1G0_CASFIKeratin 19 OS=Castor fiber PE=2 SV=1	399	tr|F1Q0N9|F1Q0N9_CANLFUncharacterized protein OS=Canis lupus familiaris GN=KRT19 PE=3 SV=1	F1Q0N9	0	100	805.438	399	399
F1P8A6	G7Q2X0_MACFA Z39Ig OS=Macaca fascicularis GN=EGM_18851 PE=4 SV=1	399	tr|F1P8A6|F1P8A6_CANLFUncharacterized protein OS=Canis lupus familiaris GN=VSIG4 PE=4 SV=2	F1P8A6	0	100	829.321	399	399
J9NYN2	CSRP1_RATCysteine and glycine-rich 1 OS=Rattus norvegicus GN=Csrp1 PE=1 SV=2	193	tr|J9NYN2|J9NYN2_CANLFUncharacterized protein OS=Canis lupus familiaris GN=CSRP1 PE=4 SV=1	J9NYN2	6.48177e-138	100	391.734	193	193
Q0QEN2	L5KVR4_PTEALATP synthase subunit beta OS=Pteropus alecto GN=PAL_GLEAN10004833 PE=3 SV=1	321	tr|L5KVR4|L5KVR4_PTEALATP synthase subunit beta OS=Pteropus alecto GN=PAL_GLEAN10004833 PE=3 SV=1	L5KVR4	0	100	656.751	321	321
E2RKW4	M1EPH8_MUSPFCysteine-rich secretory 3 (Fragment) OS=Mustela putorius furo PE=2 SV=1	183	tr|E2RKW4|E2RKW4_CANLFUncharacterized protein OS=Canis lupus familiaris GN=CRISP2 PE=3 SV=2	E2RKW4	1.80047e-136	100	387.111	183	183
J9PB81	A0A061IJ91_CRIGRCathepsin G OS=Cricetulus griseus GN=H671_1g4192 PE=3 SV=1	247	tr|J9PB81|J9PB81_CANLFUncharacterized protein OS=Canis lupus familiaris GN=CTSG PE=3 SV=1	J9PB81	5.40263e-179	100	500.36	247	247
C4MW55	C4MW55_CANLFCytochrome c oxidase subunit 2 OS=Canis lupus familiaris GN=COX2 PE=3 SV=1	227	tr|C4MW55|C4MW55_CANLFCytochrome c oxidase subunit 2 OS=Canis lupus familiaris GN=COX2 PE=3 SV=1	C4MW55	8.02406e-165	100	462.611	227	227
F1PPB6	H2Q5J5_PANTRDeoxyribose-phosphate aldolase ( ) OS=Pan troglodytes GN=DERA PE=2 SV=1	318	tr|F1PPB6|F1PPB6_CANLFUncharacterized protein OS=Canis lupus familiaris GN=DERA PE=4 SV=2	F1PPB6	0	100	655.21	318	318
E2R489	type II cuticular Hb4 OS=Pteropus alecto GN=PAL_GLEAN10005099 PE=3 SV=1	586	tr|E2R489|E2R489_CANLFUncharacterized protein OS=Canis lupus familiaris GN=KRT84 PE=3 SV=1	E2R489	0	100	1201.42	586	586
E2RB38	U3ELS9_CALJATropomyosin alpha-3 chain isoform 4 OS=Callithrix jacchus GN=TPM3 PE=2 SV=1	248	tr|E2RB38|E2RB38_CANLFUncharacterized protein OS=Canis lupus familiaris GN=TPM3 PE=3 SV=2	E2RB38	8.70734e-166	100	466.848	248	248
F6X5M3	CLCB_HUMANClathrin light chain B OS=Homo sapiens GN=CLTB PE=1 SV=1	229	tr|F6X5M3|F6X5M3_CANLFUncharacterized protein OS=Canis lupus familiaris GN=CLTB PE=4 SV=1	F6X5M3	1.00302e-165	100	465.307	229	229
F1PGC3	K9K225_HORSEInterferon-induced wit tetratricopeptide repeats 2 OS=Equus caballus PE=2 SV=1	468	tr|F1PGC3|F1PGC3_CANLFUncharacterized protein OS=Canis lupus familiaris GN=IFIT2 PE=4 SV=2	F1PGC3	0	100	973.385	468	468
E2REU6	A6H7D3_BOVINKRT18 (Fragment) OS=Bos taurus GN=KRT18 PE=2 SV=1	447	tr|E2REU6|E2REU6_CANLFUncharacterized protein OS=Canis lupus familiaris GN=KRT18 PE=3 SV=2	E2REU6	0	100	910.598	447	447
F1P8T3	G9KN19_MUSPFSemaphorin GPI membrane anchor (Fragment) OS=Mustela putorius furo PE=2 SV=1	561	tr|F1P8T3|F1P8T3_CANLFUncharacterized protein OS=Canis lupus familiaris GN=SEMA7A PE=4 SV=2	F1P8T3	0	100	1179.85	561	561
E2RP87	M1EQN2_MUSPFFc of low affinity receptor (Fragment) OS=Mustela putorius furo PE=2 SV=1	249	tr|E2RP87|E2RP87_CANLFUncharacterized protein OS=Canis lupus familiaris GN=LOC478984 PE=4 SV=1	E2RP87	0	100	516.538	249	249
F1PP21	L8IQ01_9CETAInsulin enhancer ISL-1 (Fragment) OS=Bos mutus GN=M91_02701 PE=4 SV=1	360	tr|F1PP21|F1PP21_CANLFUncharacterized protein OS=Canis lupus familiaris GN=ISL1 PE=4 SV=2	F1PP21	0	100	752.666	360	360
E2R7Z9	I2CW57_MACMUAcyl-coenzyme A thioesterase 11 isoform 2 OS=Macaca mulatta GN=ACOT11 PE=2 SV=1	558	tr|E2R7Z9|E2R7Z9_CANLFUncharacterized protein OS=Canis lupus familiaris GN=ACOT11 PE=4 SV=2	E2R7Z9	0	100	1169.07	558	558
J9NWS3	type I cytoskeletal 9 OS=Canis lupus familiaris GN=KRT9 PE=3 SV=1	595	tr|J9NWS3|J9NWS3_CANLFKeratin, type I cytoskeletal 9 OS=Canis lupus familiaris GN=KRT9 PE=3 SV=1	J9NWS3	0	100	1109.75	595	595
E2R357	D5K8A6_PIGSperm associated antigen 4 OS=Sus scrofa GN=SPAG4L PE=2 SV=1	365	tr|E2R357|E2R357_CANLFUncharacterized protein OS=Canis lupus familiaris GN=SUN5 PE=4 SV=1	E2R357	0	100	767.303	365	365
F1PF31	Q4LE33_HUMANTNC variant (Fragment) OS=Homo sapiens GN=TNC variant PE=2 SV=1	2233	tr|F1PF31|F1PF31_CANLFUncharacterized protein OS=Canis lupus familiaris GN=TNC PE=4 SV=1	F1PF31	0	100	4611.98	2233	2233
F1PH83	U6DWN8_NEOVIConserved oligomeric Golgi complex subunit 7 OS=Neovison vison GN=COG7 PE=2 SV=1	687	tr|F1PH83|F1PH83_CANLFUncharacterized protein OS=Canis lupus familiaris GN=COG7 PE=4 SV=2	F1PH83	0	100	1416.75	687	687
E2RL75	L5JNT1_PTEALIntegrator complex subunit 4 OS=Pteropus alecto GN=PAL_GLEAN10025536 PE=4 SV=1	964	tr|E2RL75|E2RL75_CANLFUncharacterized protein OS=Canis lupus familiaris GN=INTS4 PE=4 SV=1	E2RL75	0	100	1985.69	964	964
J9NU17	MYO1A_HUMANUnconventional myosin-Ia OS=Homo sapiens GN=MYO1A PE=2 SV=1	927	tr|F1PD99|F1PD99_CANLFUncharacterized protein OS=Canis lupus familiaris GN=MYO1A PE=3 SV=2	F1PD99	0	100	1926.37	927	927
E2RH23	K7C1M7_PANTRBromodomain and PHD finger 1 OS=Pan troglodytes GN=BRPF1 PE=2 SV=1	1220	tr|E2RH23|E2RH23_CANLFUncharacterized protein OS=Canis lupus familiaris GN=BRPF1 PE=4 SV=1	E2RH23	0	100	2545.38	1220	1220
F1PEH9	F6Z9U8_MACMULong-chain-fatty-acid-- ligase 4 OS=Macaca mulatta GN=ACSL4 PE=2 SV=1	670	tr|F1PEH9|F1PEH9_CANLFUncharacterized protein OS=Canis lupus familiaris GN=ACSL4 PE=4 SV=2	F1PEH9	0	100	1390.94	670	670
J9NYI6	A0A140VJN5_HUMANTesticular tissue Li 111 OS=Homo sapiens PE=2 SV=1	1689	tr|J9NYI6|J9NYI6_CANLFUncharacterized protein OS=Canis lupus familiaris GN=LRRIQ1 PE=4 SV=1	J9NYI6	0	100	3458.31	1689	1689
F1Q432	TENX_HUMANTenascin-X OS=Homo sapiens GN=TNXB PE=1 SV=4	3874	tr|F1Q432|F1Q432_CANLFUncharacterized protein OS=Canis lupus familiaris GN=TNXB PE=4 SV=2	F1Q432	0	100	7841.11	3874	3874
GO, Gene Ontology; bp, biological process; mf, molecular function; cc, cellular component; OS, OrganismName; GN, GeneName; PE, protein existence; SV, SequenceVersion; Sequence desc, Sequence description; Hit desc, hit description; Protein name and description; Hit ACC, protein ID number of the sequence; E-Value, reliability evaluation of the results; Similarity, positives/alignment; positives, nu…

## Sheet: protein2go
SeqName	Hit-Desc	GO-Group	GO-ID	Term
P60524	HBB_CHRBRHemoglobin subunit beta OS=Chrysocyon brachyurus GN=HBB PE=1 SV=1	C	GO:0005833	hemoglobin complex
P60524	HBB_CHRBRHemoglobin subunit beta OS=Chrysocyon brachyurus GN=HBB PE=1 SV=1	F	GO:0005506	iron ion binding
P60524	HBB_CHRBRHemoglobin subunit beta OS=Chrysocyon brachyurus GN=HBB PE=1 SV=1	F	GO:0019825	oxygen binding
P60524	HBB_CHRBRHemoglobin subunit beta OS=Chrysocyon brachyurus GN=HBB PE=1 SV=1	F	GO:0020037	heme binding
P60524	HBB_CHRBRHemoglobin subunit beta OS=Chrysocyon brachyurus GN=HBB PE=1 SV=1	P	GO:0015671	oxygen transport
P60529	HBA_CANLFHemoglobin subunit alpha OS=Canis lupus familiaris GN=HBA PE=1 SV=1	C	GO:0005833	hemoglobin complex
P60529	HBA_CANLFHemoglobin subunit alpha OS=Canis lupus familiaris GN=HBA PE=1 SV=1	F	GO:0005506	iron ion binding
P60529	HBA_CANLFHemoglobin subunit alpha OS=Canis lupus familiaris GN=HBA PE=1 SV=1	F	GO:0019825	oxygen binding
P60529	HBA_CANLFHemoglobin subunit alpha OS=Canis lupus familiaris GN=HBA PE=1 SV=1	F	GO:0020037	heme binding
P60529	HBA_CANLFHemoglobin subunit alpha OS=Canis lupus familiaris GN=HBA PE=1 SV=1	P	GO:0015671	oxygen transport
J9JHF7	HBA_CANLAHemoglobin subunit alpha OS=Canis latrans GN=HBA PE=1 SV=2	C	GO:0005833	hemoglobin complex
J9JHF7	HBA_CANLAHemoglobin subunit alpha OS=Canis latrans GN=HBA PE=1 SV=2	F	GO:0005506	iron ion binding
J9JHF7	HBA_CANLAHemoglobin subunit alpha OS=Canis latrans GN=HBA PE=1 SV=2	F	GO:0019825	oxygen binding
J9JHF7	HBA_CANLAHemoglobin subunit alpha OS=Canis latrans GN=HBA PE=1 SV=2	F	GO:0020037	heme binding
J9JHF7	HBA_CANLAHemoglobin subunit alpha OS=Canis latrans GN=HBA PE=1 SV=2	P	GO:0015671	oxygen transport
J9JHZ3	HBB_CHRBRHemoglobin subunit beta OS=Chrysocyon brachyurus GN=HBB PE=1 SV=1	C	GO:0005833	hemoglobin complex
J9JHZ3	HBB_CHRBRHemoglobin subunit beta OS=Chrysocyon brachyurus GN=HBB PE=1 SV=1	F	GO:0005506	iron ion binding
J9JHZ3	HBB_CHRBRHemoglobin subunit beta OS=Chrysocyon brachyurus GN=HBB PE=1 SV=1	F	GO:0019825	oxygen binding
J9JHZ3	HBB_CHRBRHemoglobin subunit beta OS=Chrysocyon brachyurus GN=HBB PE=1 SV=1	F	GO:0020037	heme binding
J9JHZ3	HBB_CHRBRHemoglobin subunit beta OS=Chrysocyon brachyurus GN=HBB PE=1 SV=1	P	GO:0015671	oxygen transport
E2R5U8	E2R5U8_CANLFTransthyretin OS=Canis lupus familiaris GN=TTR PE=3 SV=1	C	GO:0044421	extracellular region part
E2R5U8	E2R5U8_CANLFTransthyretin OS=Canis lupus familiaris GN=TTR PE=3 SV=1	F	GO:0005515	protein binding
E2R5U8	E2R5U8_CANLFTransthyretin OS=Canis lupus familiaris GN=TTR PE=3 SV=1	F	GO:0070324	thyroid hormone binding
E2R5U8	E2R5U8_CANLFTransthyretin OS=Canis lupus familiaris GN=TTR PE=3 SV=1	P	GO:0042572	retinol metabolic process
E2R5U8	E2R5U8_CANLFTransthyretin OS=Canis lupus familiaris GN=TTR PE=3 SV=1	P	GO:0070327	thyroid hormone transport
F1PGS2	F1PGS2_CANLFFibrinogen beta chain OS=Canis lupus familiaris GN=FGB PE=4 SV=2	C	GO:0005577	fibrinogen complex
F1PGS2	F1PGS2_CANLFFibrinogen beta chain OS=Canis lupus familiaris GN=FGB PE=4 SV=2	C	GO:0009897	external side of plasma membrane
F1PGS2	F1PGS2_CANLFFibrinogen beta chain OS=Canis lupus familiaris GN=FGB PE=4 SV=2	C	GO:0031091	platelet alpha granule
F1PGS2	F1PGS2_CANLFFibrinogen beta chain OS=Canis lupus familiaris GN=FGB PE=4 SV=2	C	GO:0070062	extracellular vesicular exosome
F1PGS2	F1PGS2_CANLFFibrinogen beta chain OS=Canis lupus familiaris GN=FGB PE=4 SV=2	C	GO:0072562	blood microparticle
F1PGS2	F1PGS2_CANLFFibrinogen beta chain OS=Canis lupus familiaris GN=FGB PE=4 SV=2	F	GO:0005102	receptor binding
F1PGS2	F1PGS2_CANLFFibrinogen beta chain OS=Canis lupus familiaris GN=FGB PE=4 SV=2	F	GO:0005198	structural molecule activity
F1PGS2	F1PGS2_CANLFFibrinogen beta chain OS=Canis lupus familiaris GN=FGB PE=4 SV=2	F	GO:0030674	protein binding, bridging
F1PGS2	F1PGS2_CANLFFibrinogen beta chain OS=Canis lupus familiaris GN=FGB PE=4 SV=2	F	GO:0050839	cell adhesion molecule binding
F1PGS2	F1PGS2_CANLFFibrinogen beta chain OS=Canis lupus familiaris GN=FGB PE=4 SV=2	F	GO:0051087	chaperone binding
F1PGS2	F1PGS2_CANLFFibrinogen beta chain OS=Canis lupus familiaris GN=FGB PE=4 SV=2	P	GO:0007160	cell-matrix adhesion
F1PGS2	F1PGS2_CANLFFibrinogen beta chain OS=Canis lupus familiaris GN=FGB PE=4 SV=2	P	GO:0031639	plasminogen activation
F1PGS2	F1PGS2_CANLFFibrinogen beta chain OS=Canis lupus familiaris GN=FGB PE=4 SV=2	P	GO:0034116	positive regulation of heterotypic cell-cell adhesion
F1PGS2	F1PGS2_CANLFFibrinogen beta chain OS=Canis lupus familiaris GN=FGB PE=4 SV=2	P	GO:0042730	fibrinolysis
F1PGS2	F1PGS2_CANLFFibrinogen beta chain OS=Canis lupus familiaris GN=FGB PE=4 SV=2	P	GO:0043152	induction of bacterial agglutination
F1PGS2	F1PGS2_CANLFFibrinogen beta chain OS=Canis lupus familiaris GN=FGB PE=4 SV=2	P	GO:0045907	positive regulation of vasoconstriction
F1PGS2	F1PGS2_CANLFFibrinogen beta chain OS=Canis lupus familiaris GN=FGB PE=4 SV=2	P	GO:0045921	positive regulation of exocytosis
F1PGS2	F1PGS2_CANLFFibrinogen beta chain OS=Canis lupus familiaris GN=FGB PE=4 SV=2	P	GO:0050714	positive regulation of protein secretion
F1PGS2	F1PGS2_CANLFFibrinogen beta chain OS=Canis lupus familiaris GN=FGB PE=4 SV=2	P	GO:0051258	protein polymerization
F1PGS2	F1PGS2_CANLFFibrinogen beta chain OS=Canis lupus familiaris GN=FGB PE=4 SV=2	P	GO:0051592	response to calcium ion
F1PGS2	F1PGS2_CANLFFibrinogen beta chain OS=Canis lupus familiaris GN=FGB PE=4 SV=2	P	GO:0070374	positive regulation of ERK1 and ERK2 cascade
F1PGS2	F1PGS2_CANLFFibrinogen beta chain OS=Canis lupus familiaris GN=FGB PE=4 SV=2	P	GO:0070527	platelet aggregation
F1PGS2	F1PGS2_CANLFFibrinogen beta chain OS=Canis lupus familiaris GN=FGB PE=4 SV=2	P	GO:0072378	blood coagulation, fibrin clot formation
F1PGS2	F1PGS2_CANLFFibrinogen beta chain OS=Canis lupus familiaris GN=FGB PE=4 SV=2	P	GO:0090277	positive regulation of peptide hormone secretion
F1PGS2	F1PGS2_CANLFFibrinogen beta chain OS=Canis lupus familiaris GN=FGB PE=4 SV=2	P	GO:1902042	negative regulation of extrinsic apoptotic signaling pathway via death domain receptors
F1PGS2	F1PGS2_CANLFFibrinogen beta chain OS=Canis lupus familiaris GN=FGB PE=4 SV=2	P	GO:2000352	negative regulation of endothelial cell apoptotic process
F1P8G0	F1P8G0_CANLFFibrinogen gamma chain OS=Canis lupus familiaris GN=FGG PE=4 SV=2	C	GO:0005577	fibrinogen complex
F1P8G0	F1P8G0_CANLFFibrinogen gamma chain OS=Canis lupus familiaris GN=FGG PE=4 SV=2	C	GO:0044464	cell part
F1P8G0	F1P8G0_CANLFFibrinogen gamma chain OS=Canis lupus familiaris GN=FGG PE=4 SV=2	F	GO:0005102	receptor binding
F1P8G0	F1P8G0_CANLFFibrinogen gamma chain OS=Canis lupus familiaris GN=FGG PE=4 SV=2	F	GO:0030674	protein binding, bridging
F1P8G0	F1P8G0_CANLFFibrinogen gamma chain OS=Canis lupus familiaris GN=FGG PE=4 SV=2	P	GO:0007165	signal transduction
F1P8G0	F1P8G0_CANLFFibrinogen gamma chain OS=Canis lupus familiaris GN=FGG PE=4 SV=2	P	GO:0030168	platelet activation
F1P8G0	F1P8G0_CANLFFibrinogen gamma chain OS=Canis lupus familiaris GN=FGG PE=4 SV=2	P	GO:0048522	positive regulation of cellular process
F1P8G0	F1P8G0_CANLFFibrinogen gamma chain OS=Canis lupus familiaris GN=FGG PE=4 SV=2	P	GO:0051258	protein polymerization
F1P6H7	F1P6H7_CANLFFibronectin OS=Canis lupus familiaris GN=FN1 PE=4 SV=2	C	GO:0031012	extracellular matrix
F1P6H7	F1P6H7_CANLFFibronectin OS=Canis lupus familiaris GN=FN1 PE=4 SV=2	F	GO:0005515	protein binding
F1P6H7	F1P6H7_CANLFFibronectin OS=Canis lupus familiaris GN=FN1 PE=4 SV=2	P	GO:0007155	cell adhesion
F1P6H7	F1P6H7_CANLFFibronectin OS=Canis lupus familiaris GN=FN1 PE=4 SV=2	P	GO:0016043	cellular component organization
F1P6H7	F1P6H7_CANLFFibronectin OS=Canis lupus familiaris GN=FN1 PE=4 SV=2	P	GO:0044763	single-organism cellular process
F1P6H7	F1P6H7_CANLFFibronectin OS=Canis lupus familiaris GN=FN1 PE=4 SV=2	P	GO:0044767	single-organism developmental process
F1P6H7	F1P6H7_CANLFFibronectin OS=Canis lupus familiaris GN=FN1 PE=4 SV=2	P	GO:0048522	positive regulation of cellular process
F1P6H7	F1P6H7_CANLFFibronectin OS=Canis lupus familiaris GN=FN1 PE=4 SV=2	P	GO:0048856	anatomical structure development
F1P6H7	F1P6H7_CANLFFibronectin OS=Canis lupus familiaris GN=FN1 PE=4 SV=2	P	GO:0060255	regulation of macromolecule metabolic process
F1PBL4	F1PBL4_CANLFFibrinogen alpha chain OS=Canis lupus familiaris GN=FGA PE=4 SV=1	C	GO:0005577	fibrinogen complex
F1PBL4	F1PBL4_CANLFFibrinogen alpha chain OS=Canis lupus familiaris GN=FGA PE=4 SV=1	C	GO:0044464	cell part
F1PBL4	F1PBL4_CANLFFibrinogen alpha chain OS=Canis lupus familiaris GN=FGA PE=4 SV=1	F	GO:0005102	receptor binding
F1PBL4	F1PBL4_CANLFFibrinogen alpha chain OS=Canis lupus familiaris GN=FGA PE=4 SV=1	F	GO:0030674	protein binding, bridging
F1PBL4	F1PBL4_CANLFFibrinogen alpha chain OS=Canis lupus familiaris GN=FGA PE=4 SV=1	P	GO:0007165	signal transduction
F1PBL4	F1PBL4_CANLFFibrinogen alpha chain OS=Canis lupus familiaris GN=FGA PE=4 SV=1	P	GO:0030168	platelet activation
F1PBL4	F1PBL4_CANLFFibrinogen alpha chain OS=Canis lupus familiaris GN=FGA PE=4 SV=1	P	GO:0048522	positive regulation of cellular process
F1PBL4	F1PBL4_CANLFFibrinogen alpha chain OS=Canis lupus familiaris GN=FGA PE=4 SV=1	P	GO:0051258	protein polymerization
F1PDY8	M1EKL8_MUSPFCarbonic anhydrase II (Fragment) OS=Mustela putorius furo PE=2 SV=1	C	GO:0044464	cell part
F1PDY8	M1EKL8_MUSPFCarbonic anhydrase II (Fragment) OS=Mustela putorius furo PE=2 SV=1	P	GO:0042221	response to chemical stimulus
F1PDY8	M1EKL8_MUSPFCarbonic anhydrase II (Fragment) OS=Mustela putorius furo PE=2 SV=1	P	GO:0044763	single-organism cellular process
F1PDY8	M1EKL8_MUSPFCarbonic anhydrase II (Fragment) OS=Mustela putorius furo PE=2 SV=1	P	GO:0048518	positive regulation of biological process
F1PDY8	M1EKL8_MUSPFCarbonic anhydrase II (Fragment) OS=Mustela putorius furo PE=2 SV=1	P	GO:0050794	regulation of cellular process
J9NWJ5	J9NWJ5_CANLFThioredoxin OS=Canis lupus familiaris GN=TXN PE=3 SV=1	C	GO:0005737	cytoplasm
J9NWJ5	J9NWJ5_CANLFThioredoxin OS=Canis lupus familiaris GN=TXN PE=3 SV=1	C	GO:0043227	membrane-bounded organelle
J9NWJ5	J9NWJ5_CANLFThioredoxin OS=Canis lupus familiaris GN=TXN PE=3 SV=1	F	GO:0015035	protein disulfide oxidoreductase activity
J9NWJ5	J9NWJ5_CANLFThioredoxin OS=Canis lupus familiaris GN=TXN PE=3 SV=1	P	GO:0006662	glycerol ether metabolic process
J9NWJ5	J9NWJ5_CANLFThioredoxin OS=Canis lupus familiaris GN=TXN PE=3 SV=1	P	GO:0045454	cell redox homeostasis
J9NWJ5	J9NWJ5_CANLFThioredoxin OS=Canis lupus familiaris GN=TXN PE=3 SV=1	P	GO:0006118	electron transport
J9NVT1	L8B4I8_HUMANUbiquitin C OS=Homo sapiens GN= PE=4 SV=1	F	GO:0005515	protein binding
J9NVT1	L8B4I8_HUMANUbiquitin C OS=Homo sapiens GN= PE=4 SV=1	P	GO:0044702	single organism reproductive process
J9NVT1	L8B4I8_HUMANUbiquitin C OS=Homo sapiens GN= PE=4 SV=1	P	GO:0044763	single-organism cellular process
J9NVT1	L8B4I8_HUMANUbiquitin C OS=Homo sapiens GN= PE=4 SV=1	P	GO:0048513	organ development
J9NVE9	J9NVE9_CANLFSerum amyloid A OS=Canis lupus familiaris GN=LOC102155886 PE=3 SV=1	C	GO:0005576	extracellular region
J9NVE9	J9NVE9_CANLFSerum amyloid A OS=Canis lupus familiaris GN=LOC102155886 PE=3 SV=1	P	GO:0006953	acute-phase response
J9NVE9	J9NVE9_CANLFSerum amyloid A OS=Canis lupus familiaris GN=LOC102155886 PE=3 SV=1	P	GO:0010739	positive regulation of protein kinase A signaling cascade
J9NVE9	J9NVE9_CANLFSerum amyloid A OS=Canis lupus familiaris GN=LOC102155886 PE=3 SV=1	P	GO:0033138	positive regulation of peptidyl-serine phosphorylation
J9NVE9	J9NVE9_CANLFSerum amyloid A OS=Canis lupus familiaris GN=LOC102155886 PE=3 SV=1	P	GO:0042221	response to chemical stimulus
J9NVE9	J9NVE9_CANLFSerum amyloid A OS=Canis lupus familiaris GN=LOC102155886 PE=3 SV=1	P	GO:0044242	cellular lipid catabolic process
J9NVE9	J9NVE9_CANLFSerum amyloid A OS=Canis lupus familiaris GN=LOC102155886 PE=3 SV=1	P	GO:0045892	negative regulation of transcription, DNA-dependent
J9NVE9	J9NVE9_CANLFSerum amyloid A OS=Canis lupus familiaris GN=LOC102155886 PE=3 SV=1	P	GO:0050996	positive regulation of lipid catabolic process
J9NVE9	J9NVE9_CANLFSerum amyloid A OS=Canis lupus familiaris GN=LOC102155886 PE=3 SV=1	P	GO:0070374	positive regulation of ERK1 and ERK2 cascade
J9P9B9	L9JM01_TUPCHIg kappa chain V-II region RPMI 6410 OS=Tupaia chinensis GN=TREES_T100021696 PE=4 SV=1	F	GO:0005515	protein binding
J9P9B9	L9JM01_TUPCHIg kappa chain V-II region RPMI 6410 OS=Tupaia chinensis GN=TREES_T100021696 PE=4 SV=1	P	GO:0002376	immune system process
F1PBK6	V9HWE3_HUMANCarbonic anhydrase isoform CRA_a OS=Homo sapiens GN=HEL-S-11 PE=2 SV=1	C	GO:0005737	cytoplasm
F1PBK6	V9HWE3_HUMANCarbonic anhydrase isoform CRA_a OS=Homo sapiens GN=HEL-S-11 PE=2 SV=1	C	GO:0070062	extracellular vesicular exosome
F1PBK6	V9HWE3_HUMANCarbonic anhydrase isoform CRA_a OS=Homo sapiens GN=HEL-S-11 PE=2 SV=1	F	GO:0004064	arylesterase activity
F1PBK6	V9HWE3_HUMANCarbonic anhydrase isoform CRA_a OS=Homo sapiens GN=HEL-S-11 PE=2 SV=1	F	GO:0004089	carbonate dehydratase activity
F1PBK6	V9HWE3_HUMANCarbonic anhydrase isoform CRA_a OS=Homo sapiens GN=HEL-S-11 PE=2 SV=1	F	GO:0005515	protein binding
F1PBK6	V9HWE3_HUMANCarbonic anhydrase isoform CRA_a OS=Homo sapiens GN=HEL-S-11 PE=2 SV=1	F	GO:0008270	zinc ion binding
F1PBK6	V9HWE3_HUMANCarbonic anhydrase isoform CRA_a OS=Homo sapiens GN=HEL-S-11 PE=2 SV=1	P	GO:0006730	one-carbon metabolic process
F1PBK6	V9HWE3_HUMANCarbonic anhydrase isoform CRA_a OS=Homo sapiens GN=HEL-S-11 PE=2 SV=1	P	GO:0006807	nitrogen compound metabolic process
F1P6P2	A0A091CME3_FUKDATransgelin OS=Fukomys damarensis GN=H920_20495 PE=3 SV=1	C	GO:0031982	vesicle
F1P6P2	A0A091CME3_FUKDATransgelin OS=Fukomys damarensis GN=H920_20495 PE=3 SV=1	F	GO:0005515	protein binding
J9P0D4	J9P0D4_CANLFUncharacterized protein OS=Canis lupus familiaris PE=4 SV=1	F	GO:0005515	protein binding
J9P0D4	J9P0D4_CANLFUncharacterized protein OS=Canis lupus familiaris PE=4 SV=1	P	GO:0002376	immune system process
F1PYZ1	gamma A (Fragment) OS=Mustela putorius furo PE=2 SV=1	C	GO:0005833	hemoglobin complex
F1PYZ1	gamma A (Fragment) OS=Mustela putorius furo PE=2 SV=1	F	GO:0005506	iron ion binding
F1PYZ1	gamma A (Fragment) OS=Mustela putorius furo PE=2 SV=1	F	GO:0019825	oxygen binding
F1PYZ1	gamma A (Fragment) OS=Mustela putorius furo PE=2 SV=1	F	GO:0020037	heme binding
F1PYZ1	gamma A (Fragment) OS=Mustela putorius furo PE=2 SV=1	P	GO:0015671	oxygen transport
F1PTY1	type II cytoskeletal 1 OS=Canis lupus familiaris GN=KRT1 PE=3 SV=1	C	GO:0044421	extracellular region part
F1PTY1	type II cytoskeletal 1 OS=Canis lupus familiaris GN=KRT1 PE=3 SV=1	C	GO:0045095	keratin filament
F1PTY1	type II cytoskeletal 1 OS=Canis lupus familiaris GN=KRT1 PE=3 SV=1	F	GO:0005198	structural molecule activity
F1PTY1	type II cytoskeletal 1 OS=Canis lupus familiaris GN=KRT1 PE=3 SV=1	P	GO:0065007	biological regulation
Q9MZD3	Q9MZD3_CANLFPeptidyl-prolyl cis-trans isomerase (Fragment) OS=Canis lupus familiaris PE=2 SV=1	C	GO:0005737	cytoplasm
Q9MZD3	Q9MZD3_CANLFPeptidyl-prolyl cis-trans isomerase (Fragment) OS=Canis lupus familiaris PE=2 SV=1	C	GO:0043227	membrane-bounded organelle
Q9MZD3	Q9MZD3_CANLFPeptidyl-prolyl cis-trans isomerase (Fragment) OS=Canis lupus familiaris PE=2 SV=1	F	GO:0003755	peptidyl-prolyl cis-trans isomerase activity
Q9MZD3	Q9MZD3_CANLFPeptidyl-prolyl cis-trans isomerase (Fragment) OS=Canis lupus familiaris PE=2 SV=1	P	GO:0000413	protein peptidyl-prolyl isomerization
Q9MZD3	Q9MZD3_CANLFPeptidyl-prolyl cis-trans isomerase (Fragment) OS=Canis lupus familiaris PE=2 SV=1	P	GO:0006457	protein folding
Q9MZD3	Q9MZD3_CANLFPeptidyl-prolyl cis-trans isomerase (Fragment) OS=Canis lupus familiaris PE=2 SV=1	P	GO:0045069	regulation of viral genome replication
J9NU05	LDHB_PANTRL-lactate dehydrogenase B chain OS=Pan troglodytes GN=LDHB PE=2 SV=1	C	GO:0005737	cytoplasm
J9NU05	LDHB_PANTRL-lactate dehydrogenase B chain OS=Pan troglodytes GN=LDHB PE=2 SV=1	F	GO:0004459	L-lactate dehydrogenase activity
J9NU05	LDHB_PANTRL-lactate dehydrogenase B chain OS=Pan troglodytes GN=LDHB PE=2 SV=1	P	GO:0055114	oxidation-reduction process
J9NU05	LDHB_PANTRL-lactate dehydrogenase B chain OS=Pan troglodytes GN=LDHB PE=2 SV=1	P	GO:0006094	gluconeogenesis
J9NU05	LDHB_PANTRL-lactate dehydrogenase B chain OS=Pan troglodytes GN=LDHB PE=2 SV=1	P	GO:0006096	glycolysis
J9NU05	LDHB_PANTRL-lactate dehydrogenase B chain OS=Pan troglodytes GN=LDHB PE=2 SV=1	P	GO:0006534	cysteine metabolic process
E2R2C3	E2R2C3_CANLFGlucose-6-phosphate isomerase OS=Canis lupus familiaris GN=GPI PE=3 SV=1	C	GO:0044464	cell part
E2R2C3	E2R2C3_CANLFGlucose-6-phosphate isomerase OS=Canis lupus familiaris GN=GPI PE=3 SV=1	F	GO:0004347	glucose-6-phosphate isomerase activity
E2R2C3	E2R2C3_CANLFGlucose-6-phosphate isomerase OS=Canis lupus familiaris GN=GPI PE=3 SV=1	P	GO:0006094	gluconeogenesis
E2R2C3	E2R2C3_CANLFGlucose-6-phosphate isomerase OS=Canis lupus familiaris GN=GPI PE=3 SV=1	P	GO:0006096	glycolysis
E2R2C3	E2R2C3_CANLFGlucose-6-phosphate isomerase OS=Canis lupus familiaris GN=GPI PE=3 SV=1	P	GO:0005982	starch metabolic process
E2R2C3	E2R2C3_CANLFGlucose-6-phosphate isomerase OS=Canis lupus familiaris GN=GPI PE=3 SV=1	P	GO:0005985	sucrose metabolic process
E2R2C3	E2R2C3_CANLFGlucose-6-phosphate isomerase OS=Canis lupus familiaris GN=GPI PE=3 SV=1	P	GO:0006098	pentose-phosphate shunt
F1Q0N9	A0A0K2A1G0_CASFIKeratin 19 OS=Castor fiber PE=2 SV=1	C	GO:0005882	intermediate filament
F1Q0N9	A0A0K2A1G0_CASFIKeratin 19 OS=Castor fiber PE=2 SV=1	C	GO:0071944	cell periphery
F1Q0N9	A0A0K2A1G0_CASFIKeratin 19 OS=Castor fiber PE=2 SV=1	F	GO:0005198	structural molecule activity
F1P8A6	G7Q2X0_MACFA Z39Ig OS=Macaca fascicularis GN=EGM_18851 PE=4 SV=1	C	GO:0016020	membrane
F1P8A6	G7Q2X0_MACFA Z39Ig OS=Macaca fascicularis GN=EGM_18851 PE=4 SV=1	F	GO:0005515	protein binding
J9NYN2	CSRP1_RATCysteine and glycine-rich 1 OS=Rattus norvegicus GN=Csrp1 PE=1 SV=2	C	GO:0043227	membrane-bounded organelle
J9NYN2	CSRP1_RATCysteine and glycine-rich 1 OS=Rattus norvegicus GN=Csrp1 PE=1 SV=2	F	GO:0008270	zinc ion binding
Q0QEN2	L5KVR4_PTEALATP synthase subunit beta OS=Pteropus alecto GN=PAL_GLEAN10004833 PE=3 SV=1	C	GO:0033178	proton-transporting two-sector ATPase complex, catalytic domain
Q0QEN2	L5KVR4_PTEALATP synthase subunit beta OS=Pteropus alecto GN=PAL_GLEAN10004833 PE=3 SV=1	C	GO:0044429	mitochondrial part
Q0QEN2	L5KVR4_PTEALATP synthase subunit beta OS=Pteropus alecto GN=PAL_GLEAN10004833 PE=3 SV=1	F	GO:0005524	ATP binding
Q0QEN2	L5KVR4_PTEALATP synthase subunit beta OS=Pteropus alecto GN=PAL_GLEAN10004833 PE=3 SV=1	F	GO:0046933	proton-transporting ATP synthase activity, rotational mechanism
Q0QEN2	L5KVR4_PTEALATP synthase subunit beta OS=Pteropus alecto GN=PAL_GLEAN10004833 PE=3 SV=1	P	GO:0015986	ATP synthesis coupled proton transport
Q0QEN2	L5KVR4_PTEALATP synthase subunit beta OS=Pteropus alecto GN=PAL_GLEAN10004833 PE=3 SV=1	P	GO:0015991	ATP hydrolysis coupled proton transport
Q0QEN2	L5KVR4_PTEALATP synthase subunit beta OS=Pteropus alecto GN=PAL_GLEAN10004833 PE=3 SV=1	C	GO:0045259	proton-transporting ATP synthase complex
E2RKW4	M1EPH8_MUSPFCysteine-rich secretory 3 (Fragment) OS=Mustela putorius furo PE=2 SV=1	C	GO:0005576	extracellular region
J9PB81	A0A061IJ91_CRIGRCathepsin G OS=Cricetulus griseus GN=H671_1g4192 PE=3 SV=1	C	GO:0005737	cytoplasm
J9PB81	A0A061IJ91_CRIGRCathepsin G OS=Cricetulus griseus GN=H671_1g4192 PE=3 SV=1	C	GO:0043231	intracellular membrane-bounded organelle
J9PB81	A0A061IJ91_CRIGRCathepsin G OS=Cricetulus griseus GN=H671_1g4192 PE=3 SV=1	F	GO:0004252	serine-type endopeptidase activity
J9PB81	A0A061IJ91_CRIGRCathepsin G OS=Cricetulus griseus GN=H671_1g4192 PE=3 SV=1	P	GO:0002376	immune system process
J9PB81	A0A061IJ91_CRIGRCathepsin G OS=Cricetulus griseus GN=H671_1g4192 PE=3 SV=1	P	GO:0006508	proteolysis
J9PB81	A0A061IJ91_CRIGRCathepsin G OS=Cricetulus griseus GN=H671_1g4192 PE=3 SV=1	P	GO:0051707	response to other organism
C4MW55	C4MW55_CANLFCytochrome c oxidase subunit 2 OS=Canis lupus familiaris GN=COX2 PE=3 SV=1	C	GO:0016021	integral to membrane
C4MW55	C4MW55_CANLFCytochrome c oxidase subunit 2 OS=Canis lupus familiaris GN=COX2 PE=3 SV=1	F	GO:0004129	cytochrome-c oxidase activity
C4MW55	C4MW55_CANLFCytochrome c oxidase subunit 2 OS=Canis lupus familiaris GN=COX2 PE=3 SV=1	F	GO:0005507	copper ion binding
C4MW55	C4MW55_CANLFCytochrome c oxidase subunit 2 OS=Canis lupus familiaris GN=COX2 PE=3 SV=1	P	GO:0006123	mitochondrial electron transport, cytochrome c to oxygen
C4MW55	C4MW55_CANLFCytochrome c oxidase subunit 2 OS=Canis lupus familiaris GN=COX2 PE=3 SV=1	P	GO:0015992	proton transport
C4MW55	C4MW55_CANLFCytochrome c oxidase subunit 2 OS=Canis lupus familiaris GN=COX2 PE=3 SV=1	C	GO:0045277	respiratory chain complex IV
F1PPB6	H2Q5J5_PANTRDeoxyribose-phosphate aldolase ( ) OS=Pan troglodytes GN=DERA PE=2 SV=1	C	GO:0005737	cytoplasm
F1PPB6	H2Q5J5_PANTRDeoxyribose-phosphate aldolase ( ) OS=Pan troglodytes GN=DERA PE=2 SV=1	F	GO:0004139	deoxyribose-phosphate aldolase activity
F1PPB6	H2Q5J5_PANTRDeoxyribose-phosphate aldolase ( ) OS=Pan troglodytes GN=DERA PE=2 SV=1	P	GO:0009264	deoxyribonucleotide catabolic process
F1PPB6	H2Q5J5_PANTRDeoxyribose-phosphate aldolase ( ) OS=Pan troglodytes GN=DERA PE=2 SV=1	P	GO:0006098	pentose-phosphate shunt
E2R489	type II cuticular Hb4 OS=Pteropus alecto GN=PAL_GLEAN10005099 PE=3 SV=1	C	GO:0045095	keratin filament
E2R489	type II cuticular Hb4 OS=Pteropus alecto GN=PAL_GLEAN10005099 PE=3 SV=1	F	GO:0005198	structural molecule activity
F6X5M3	CLCB_HUMANClathrin light chain B OS=Homo sapiens GN=CLTB PE=1 SV=1	C	GO:0030130	clathrin coat of trans-Golgi network vesicle
F6X5M3	CLCB_HUMANClathrin light chain B OS=Homo sapiens GN=CLTB PE=1 SV=1	C	GO:0030132	clathrin coat of coated pit
F6X5M3	CLCB_HUMANClathrin light chain B OS=Homo sapiens GN=CLTB PE=1 SV=1	F	GO:0005198	structural molecule activity
F6X5M3	CLCB_HUMANClathrin light chain B OS=Homo sapiens GN=CLTB PE=1 SV=1	F	GO:0005515	protein binding
F6X5M3	CLCB_HUMANClathrin light chain B OS=Homo sapiens GN=CLTB PE=1 SV=1	P	GO:0006886	intracellular protein transport
F6X5M3	CLCB_HUMANClathrin light chain B OS=Homo sapiens GN=CLTB PE=1 SV=1	P	GO:0016192	vesicle-mediated transport
F1PGC3	K9K225_HORSEInterferon-induced wit tetratricopeptide repeats 2 OS=Equus caballus PE=2 SV=1	F	GO:0003723	RNA binding
F1PGC3	K9K225_HORSEInterferon-induced wit tetratricopeptide repeats 2 OS=Equus caballus PE=2 SV=1	F	GO:0005515	protein binding
F1PGC3	K9K225_HORSEInterferon-induced wit tetratricopeptide repeats 2 OS=Equus caballus PE=2 SV=1	P	GO:0009615	response to virus
F1PGC3	K9K225_HORSEInterferon-induced wit tetratricopeptide repeats 2 OS=Equus caballus PE=2 SV=1	P	GO:0035457	cellular response to interferon-alpha
E2REU6	A6H7D3_BOVINKRT18 (Fragment) OS=Bos taurus GN=KRT18 PE=2 SV=1	C	GO:0005737	cytoplasm
E2REU6	A6H7D3_BOVINKRT18 (Fragment) OS=Bos taurus GN=KRT18 PE=2 SV=1	C	GO:0005882	intermediate filament
E2REU6	A6H7D3_BOVINKRT18 (Fragment) OS=Bos taurus GN=KRT18 PE=2 SV=1	F	GO:0005198	structural molecule activity
E2REU6	A6H7D3_BOVINKRT18 (Fragment) OS=Bos taurus GN=KRT18 PE=2 SV=1	P	GO:0044763	single-organism cellular process
F1P8T3	G9KN19_MUSPFSemaphorin GPI membrane anchor (Fragment) OS=Mustela putorius furo PE=2 SV=1	C	GO:0005886	plasma membrane
F1P8T3	G9KN19_MUSPFSemaphorin GPI membrane anchor (Fragment) OS=Mustela putorius furo PE=2 SV=1	C	GO:0044425	membrane part
F1P8T3	G9KN19_MUSPFSemaphorin GPI membrane anchor (Fragment) OS=Mustela putorius furo PE=2 SV=1	F	GO:0005102	receptor binding
F1P8T3	G9KN19_MUSPFSemaphorin GPI membrane anchor (Fragment) OS=Mustela putorius furo PE=2 SV=1	P	GO:0001649	osteoblast differentiation
F1P8T3	G9KN19_MUSPFSemaphorin GPI membrane anchor (Fragment) OS=Mustela putorius furo PE=2 SV=1	P	GO:0006955	immune response
F1P8T3	G9KN19_MUSPFSemaphorin GPI membrane anchor (Fragment) OS=Mustela putorius furo PE=2 SV=1	P	GO:0007229	integrin-mediated signaling pathway
F1P8T3	G9KN19_MUSPFSemaphorin GPI membrane anchor (Fragment) OS=Mustela putorius furo PE=2 SV=1	P	GO:0032101	regulation of response to external stimulus
F1P8T3	G9KN19_MUSPFSemaphorin GPI membrane anchor (Fragment) OS=Mustela putorius furo PE=2 SV=1	P	GO:0040012	regulation of locomotion
F1P8T3	G9KN19_MUSPFSemaphorin GPI membrane anchor (Fragment) OS=Mustela putorius furo PE=2 SV=1	P	GO:0045773	positive regulation of axon extension
F1P8T3	G9KN19_MUSPFSemaphorin GPI membrane anchor (Fragment) OS=Mustela putorius furo PE=2 SV=1	P	GO:0048513	organ development
F1P8T3	G9KN19_MUSPFSemaphorin GPI membrane anchor (Fragment) OS=Mustela putorius furo PE=2 SV=1	P	GO:0051270	regulation of cellular component movement
F1P8T3	G9KN19_MUSPFSemaphorin GPI membrane anchor (Fragment) OS=Mustela putorius furo PE=2 SV=1	P	GO:0070374	positive regulation of ERK1 and ERK2 cascade
E2RP87	M1EQN2_MUSPFFc of low affinity receptor (Fragment) OS=Mustela putorius furo PE=2 SV=1	C	GO:0016020	membrane
E2RP87	M1EQN2_MUSPFFc of low affinity receptor (Fragment) OS=Mustela putorius furo PE=2 SV=1	F	GO:0005515	protein binding
F1PP21	L8IQ01_9CETAInsulin enhancer ISL-1 (Fragment) OS=Bos mutus GN=M91_02701 PE=4 SV=1	F	GO:0003677	DNA binding
F1PP21	L8IQ01_9CETAInsulin enhancer ISL-1 (Fragment) OS=Bos mutus GN=M91_02701 PE=4 SV=1	F	GO:0008270	zinc ion binding
F1PP21	L8IQ01_9CETAInsulin enhancer ISL-1 (Fragment) OS=Bos mutus GN=M91_02701 PE=4 SV=1	P	GO:0001819	positive regulation of cytokine production
F1PP21	L8IQ01_9CETAInsulin enhancer ISL-1 (Fragment) OS=Bos mutus GN=M91_02701 PE=4 SV=1	P	GO:0003206	cardiac chamber morphogenesis
F1PP21	L8IQ01_9CETAInsulin enhancer ISL-1 (Fragment) OS=Bos mutus GN=M91_02701 PE=4 SV=1	P	GO:0007417	central nervous system development
F1PP21	L8IQ01_9CETAInsulin enhancer ISL-1 (Fragment) OS=Bos mutus GN=M91_02701 PE=4 SV=1	P	GO:0009888	tissue development
F1PP21	L8IQ01_9CETAInsulin enhancer ISL-1 (Fragment) OS=Bos mutus GN=M91_02701 PE=4 SV=1	P	GO:0010468	regulation of gene expression
F1PP21	L8IQ01_9CETAInsulin enhancer ISL-1 (Fragment) OS=Bos mutus GN=M91_02701 PE=4 SV=1	P	GO:0030182	neuron differentiation
F1PP21	L8IQ01_9CETAInsulin enhancer ISL-1 (Fragment) OS=Bos mutus GN=M91_02701 PE=4 SV=1	P	GO:0031323	regulation of cellular metabolic process
F1PP21	L8IQ01_9CETAInsulin enhancer ISL-1 (Fragment) OS=Bos mutus GN=M91_02701 PE=4 SV=1	P	GO:0045165	cell fate commitment
F1PP21	L8IQ01_9CETAInsulin enhancer ISL-1 (Fragment) OS=Bos mutus GN=M91_02701 PE=4 SV=1	P	GO:0048468	cell development
F1PP21	L8IQ01_9CETAInsulin enhancer ISL-1 (Fragment) OS=Bos mutus GN=M91_02701 PE=4 SV=1	P	GO:0048522	positive regulation of cellular process
F1PP21	L8IQ01_9CETAInsulin enhancer ISL-1 (Fragment) OS=Bos mutus GN=M91_02701 PE=4 SV=1	P	GO:0048523	negative regulation of cellular process
F1PP21	L8IQ01_9CETAInsulin enhancer ISL-1 (Fragment) OS=Bos mutus GN=M91_02701 PE=4 SV=1	P	GO:0080090	regulation of primary metabolic process
E2R7Z9	I2CW57_MACMUAcyl-coenzyme A thioesterase 11 isoform 2 OS=Macaca mulatta GN=ACOT11 PE=2 SV=1	C	GO:0005829	cytosol
E2R7Z9	I2CW57_MACMUAcyl-coenzyme A thioesterase 11 isoform 2 OS=Macaca mulatta GN=ACOT11 PE=2 SV=1	C	GO:0070062	extracellular vesicular exosome
E2R7Z9	I2CW57_MACMUAcyl-coenzyme A thioesterase 11 isoform 2 OS=Macaca mulatta GN=ACOT11 PE=2 SV=1	F	GO:0008289	lipid binding
E2R7Z9	I2CW57_MACMUAcyl-coenzyme A thioesterase 11 isoform 2 OS=Macaca mulatta GN=ACOT11 PE=2 SV=1	F	GO:0047617	acyl-CoA hydrolase activity
E2R7Z9	I2CW57_MACMUAcyl-coenzyme A thioesterase 11 isoform 2 OS=Macaca mulatta GN=ACOT11 PE=2 SV=1	P	GO:0035338	long-chain fatty-acyl-CoA biosynthetic process
E2R7Z9	I2CW57_MACMUAcyl-coenzyme A thioesterase 11 isoform 2 OS=Macaca mulatta GN=ACOT11 PE=2 SV=1	P	GO:0050896	response to stimulus
J9NWS3	type I cytoskeletal 9 OS=Canis lupus familiaris GN=KRT9 PE=3 SV=1	C	GO:0005882	intermediate filament
J9NWS3	type I cytoskeletal 9 OS=Canis lupus familiaris GN=KRT9 PE=3 SV=1	F	GO:0005198	structural molecule activity
J9NWS3	type I cytoskeletal 9 OS=Canis lupus familiaris GN=KRT9 PE=3 SV=1	P	GO:0044699	single-organism process
E2R357	D5K8A6_PIGSperm associated antigen 4 OS=Sus scrofa GN=SPAG4L PE=2 SV=1	P	GO:0006996	organelle organization
E2R357	D5K8A6_PIGSperm associated antigen 4 OS=Sus scrofa GN=SPAG4L PE=2 SV=1	P	GO:0007283	spermatogenesis
E2R357	D5K8A6_PIGSperm associated antigen 4 OS=Sus scrofa GN=SPAG4L PE=2 SV=1	P	GO:0044763	single-organism cellular process
F1PF31	Q4LE33_HUMANTNC variant (Fragment) OS=Homo sapiens GN=TNC variant PE=2 SV=1	C	GO:0031012	extracellular matrix
F1PF31	Q4LE33_HUMANTNC variant (Fragment) OS=Homo sapiens GN=TNC variant PE=2 SV=1	F	GO:0005515	protein binding
F1PF31	Q4LE33_HUMANTNC variant (Fragment) OS=Homo sapiens GN=TNC variant PE=2 SV=1	P	GO:0007155	cell adhesion
F1PF31	Q4LE33_HUMANTNC variant (Fragment) OS=Homo sapiens GN=TNC variant PE=2 SV=1	P	GO:0042127	regulation of cell proliferation
F1PH83	U6DWN8_NEOVIConserved oligomeric Golgi complex subunit 7 OS=Neovison vison GN=COG7 PE=2 SV=1	C	GO:0017119	Golgi transport complex
F1PH83	U6DWN8_NEOVIConserved oligomeric Golgi complex subunit 7 OS=Neovison vison GN=COG7 PE=2 SV=1	P	GO:0006886	intracellular protein transport
F1PH83	U6DWN8_NEOVIConserved oligomeric Golgi complex subunit 7 OS=Neovison vison GN=COG7 PE=2 SV=1	P	GO:0009987	cellular process
E2RL75	L5JNT1_PTEALIntegrator complex subunit 4 OS=Pteropus alecto GN=PAL_GLEAN10025536 PE=4 SV=1	C	GO:0032039	integrator complex
E2RL75	L5JNT1_PTEALIntegrator complex subunit 4 OS=Pteropus alecto GN=PAL_GLEAN10025536 PE=4 SV=1	F	GO:0005488	binding
E2RL75	L5JNT1_PTEALIntegrator complex subunit 4 OS=Pteropus alecto GN=PAL_GLEAN10025536 PE=4 SV=1	P	GO:0016180	snRNA processing
J9NU17	MYO1A_HUMANUnconventional myosin-Ia OS=Homo sapiens GN=MYO1A PE=2 SV=1	C	GO:0005902	microvillus
J9NU17	MYO1A_HUMANUnconventional myosin-Ia OS=Homo sapiens GN=MYO1A PE=2 SV=1	C	GO:0005903	brush border
J9NU17	MYO1A_HUMANUnconventional myosin-Ia OS=Homo sapiens GN=MYO1A PE=2 SV=1	C	GO:0016323	basolateral plasma membrane
J9NU17	MYO1A_HUMANUnconventional myosin-Ia OS=Homo sapiens GN=MYO1A PE=2 SV=1	C	GO:0016328	lateral plasma membrane
J9NU17	MYO1A_HUMANUnconventional myosin-Ia OS=Homo sapiens GN=MYO1A PE=2 SV=1	C	GO:0016459	myosin complex
J9NU17	MYO1A_HUMANUnconventional myosin-Ia OS=Homo sapiens GN=MYO1A PE=2 SV=1	C	GO:0030864	cortical actin cytoskeleton
J9NU17	MYO1A_HUMANUnconventional myosin-Ia OS=Homo sapiens GN=MYO1A PE=2 SV=1	C	GO:0031941	filamentous actin
J9NU17	MYO1A_HUMANUnconventional myosin-Ia OS=Homo sapiens GN=MYO1A PE=2 SV=1	F	GO:0003774	motor activity
J9NU17	MYO1A_HUMANUnconventional myosin-Ia OS=Homo sapiens GN=MYO1A PE=2 SV=1	F	GO:0005515	protein binding
J9NU17	MYO1A_HUMANUnconventional myosin-Ia OS=Homo sapiens GN=MYO1A PE=2 SV=1	F	GO:0005524	ATP binding
J9NU17	MYO1A_HUMANUnconventional myosin-Ia OS=Homo sapiens GN=MYO1A PE=2 SV=1	P	GO:0007605	sensory perception of sound
J9NU17	MYO1A_HUMANUnconventional myosin-Ia OS=Homo sapiens GN=MYO1A PE=2 SV=1	P	GO:0051648	vesicle localization
E2RH23	K7C1M7_PANTRBromodomain and PHD finger 1 OS=Pan troglodytes GN=BRPF1 PE=2 SV=1	C	GO:0005634	nucleus
E2RH23	K7C1M7_PANTRBromodomain and PHD finger 1 OS=Pan troglodytes GN=BRPF1 PE=2 SV=1	F	GO:0005515	protein binding
E2RH23	K7C1M7_PANTRBromodomain and PHD finger 1 OS=Pan troglodytes GN=BRPF1 PE=2 SV=1	F	GO:0008270	zinc ion binding
F1PEH9	F6Z9U8_MACMULong-chain-fatty-acid-- ligase 4 OS=Macaca mulatta GN=ACSL4 PE=2 SV=1	C	GO:0043226	organelle
F1PEH9	F6Z9U8_MACMULong-chain-fatty-acid-- ligase 4 OS=Macaca mulatta GN=ACSL4 PE=2 SV=1	F	GO:0016874	ligase activity
F1PEH9	F6Z9U8_MACMULong-chain-fatty-acid-- ligase 4 OS=Macaca mulatta GN=ACSL4 PE=2 SV=1	P	GO:0008152	metabolic process
F1PEH9	F6Z9U8_MACMULong-chain-fatty-acid-- ligase 4 OS=Macaca mulatta GN=ACSL4 PE=2 SV=1	P	GO:0044699	single-organism process
J9NYI6	A0A140VJN5_HUMANTesticular tissue Li 111 OS=Homo sapiens PE=2 SV=1	F	GO:0005515	protein binding
F1Q432	TENX_HUMANTenascin-X OS=Homo sapiens GN=TNXB PE=1 SV=4	C	GO:0005578	proteinaceous extracellular matrix
F1Q432	TENX_HUMANTenascin-X OS=Homo sapiens GN=TNXB PE=1 SV=4	F	GO:0005515	protein binding
F1Q432	TENX_HUMANTenascin-X OS=Homo sapiens GN=TNXB PE=1 SV=4	P	GO:0030199	collagen fibril organization
F1Q432	TENX_HUMANTenascin-X OS=Homo sapiens GN=TNXB PE=1 SV=4	P	GO:0044710	single-organism metabolic process
F1Q432	TENX_HUMANTenascin-X OS=Homo sapiens GN=TNXB PE=1 SV=4	P	GO:0071704	organic substance metabolic process

## Sheet: bp
Level	GO ID	Term	GO Type	#Seqs	Sequence Names
1	GO:0008150	biological_process	Biological Process	39	F1PYZ1, J9P9B9, E2RL75, J9NVE9, F6X5M3, F1Q432, F1P6H7, J9JHZ3, C4MW55, F1PBL4, J9NU17, J9JHF7, F1PPB6, F1PH83, J9PB81, F1PDY8, E2R5U8, F1P8G0, E2R2C3, J9NVT1, F1PEH9, F1PP21, P60529, F1PBK6, Q9MZD3, E2REU6, F1PGS2, F1PTY1, J9NWJ5, J9P0D4, F1PF31, E2R7Z9, E2R357, Q0QEN2, J9NU05, J9NWS3, F1P8T3, F1PGC3, P60524
2	GO:0051179	localization	Biological Process	13	F1PYZ1, P60529, F6X5M3, J9JHZ3, F1PGS2, C4MW55, J9JHF7, J9NU17, F1PH83, Q0QEN2, E2R5U8, F1P8T3, P60524
2	GO:0040007	growth	Biological Process	1	F1P8T3
2	GO:0000003	reproduction	Biological Process	2	E2R357, J9NVT1
2	GO:0009987	cellular process	Biological Process	26	E2RL75, J9NVE9, F1Q432, F1P6H7, F1PBL4, C4MW55, F1PPB6, F1PDY8, F1PH83, F1P8G0, E2R5U8, E2R2C3, J9NVT1, F1PP21, F1PBK6, Q9MZD3, E2REU6, F1PGS2, J9NWJ5, E2R7Z9, F1PF31, E2R357, J9NU05, Q0QEN2, F1P8T3, F1PGC3
2	GO:0032502	developmental process	Biological Process	4	F1PP21, F1P8T3, F1P6H7, J9NVT1
2	GO:0008152	metabolic process	Biological Process	19	E2RL75, F1PP21, F1PBK6, Q9MZD3, J9NVE9, F1Q432, F1PGS2, F1P6H7, J9NWJ5, C4MW55, F1PPB6, E2R7Z9, J9NU05, J9PB81, Q0QEN2, E2R5U8, E2R2C3, F1P8T3, F1PEH9
2	GO:0065007	biological regulation	Biological Process	13	F1PP21, Q9MZD3, J9NVE9, F1PGS2, F1P6H7, F1PTY1, J9NWJ5, F1PBL4, F1PF31, F1PDY8, F1P8G0, E2R5U8, F1P8T3
2	GO:0022610	biological adhesion	Biological Process	3	F1PF31, F1PGS2, F1P6H7
2	GO:0044699	single-organism process	Biological Process	28	F1PYZ1, J9NVE9, F1Q432, F1P6H7, J9JHZ3, F1PBL4, C4MW55, J9JHF7, F1PPB6, F1PDY8, F1P8G0, E2R5U8, E2R2C3, J9NVT1, F1PEH9, F1PP21, P60529, F1PBK6, E2REU6, F1PGS2, J9NWJ5, F1PF31, E2R357, Q0QEN2, J9NU05, J9NWS3, F1P8T3, P60524
2	GO:0048519	negative regulation of biological process	Biological Process	3	F1PP21, J9NVE9, F1PGS2
2	GO:0023052	signaling	Biological Process	5	J9NVE9, F1P8G0, F1P8T3, F1PGS2, F1PBL4
2	GO:0002376	immune system process	Biological Process	5	J9P9B9, J9P0D4, J9PB81, F1P8T3, F1PGS2
2	GO:0050896	response to stimulus	Biological Process	9	E2R7Z9, J9NVE9, J9PB81, F1PDY8, F1P8G0, F1P8T3, F1PGC3, F1PGS2, F1PBL4
2	GO:0022414	reproductive process	Biological Process	2	E2R357, J9NVT1
2	GO:0071840	cellular component organization or biogenesis	Biological Process	7	E2R357, F1P8G0, F1Q432, F1P8T3, F1P6H7, F1PGS2, F1PBL4
2	GO:0040011	locomotion	Biological Process	1	F1P8T3
2	GO:0050789	regulation of biological process	Biological Process	11	F1PP21, Q9MZD3, F1PF31, J9NVE9, F1PDY8, F1P8G0, F1P8T3, F1PGS2, F1P6H7, J9NWJ5, F1PBL4
2	GO:0032501	multicellular organismal process	Biological Process	8	F1PP21, J9NU17, E2R357, F1P8G0, F1P8T3, F1PGS2, J9NVT1, F1PBL4
2	GO:0048518	positive regulation of biological process	Biological Process	8	F1PP21, J9NVE9, F1PDY8, F1P8G0, F1P8T3, F1PGS2, F1P6H7, F1PBL4
2	GO:0051704	multi-organism process	Biological Process	5	Q9MZD3, J9PB81, E2R357, F1PGC3, F1PGS2
3	GO:1902578	single-organism localization	Biological Process	9	F1PYZ1, P60529, J9JHF7, Q0QEN2, E2R5U8, F1PGS2, J9JHZ3, C4MW55, P60524
3	GO:0009607	response to biotic stimulus	Biological Process	3	J9PB81, F1PGC3, F1PGS2
3	GO:0048609	multicellular organismal reproductive process	Biological Process	1	E2R357
3	GO:0032879	regulation of localization	Biological Process	2	F1P8T3, F1PGS2
3	GO:0016049	cell growth	Biological Process	1	F1P8T3
3	GO:0072376	protein activation cascade	Biological Process	1	F1PGS2
3	GO:0051241	negative regulation of multicellular organismal process	Biological Process	1	F1PGS2
3	GO:0006950	response to stress	Biological Process	4	J9NVE9, F1P8G0, F1PGS2, F1PBL4
3	GO:0023057	negative regulation of signaling	Biological Process	1	F1PGS2
3	GO:0051234	establishment of localization	Biological Process	11	F1PYZ1, P60529, J9JHF7, F1PH83, Q0QEN2, F6X5M3, E2R5U8, J9JHZ3, F1PGS2, C4MW55, P60524
3	GO:0040008	regulation of growth	Biological Process	1	F1P8T3
3	GO:0044764	multi-organism cellular process	Biological Process	2	Q9MZD3, F1PGC3
3	GO:0008283	cell proliferation	Biological Process	1	F1PF31
3	GO:0009892	negative regulation of metabolic process	Biological Process	1	J9NVE9
3	GO:0016043	cellular component organization	Biological Process	7	E2R357, F1P8G0, F1Q432, F1P8T3, F1PGS2, F1P6H7, F1PBL4
3	GO:0048584	positive regulation of response to stimulus	Biological Process	3	J9NVE9, F1P8T3, F1PGS2
3	GO:0051240	positive regulation of multicellular organismal process	Biological Process	3	F1PP21, F1P8T3, F1PGS2
3	GO:0044238	primary metabolic process	Biological Process	13	E2RL75, F1PP21, Q9MZD3, J9NVE9, F1PGS2, C4MW55, F1PPB6, J9PB81, J9NU05, Q0QEN2, E2R5U8, E2R2C3, F1P8T3
3	GO:0019953	sexual reproduction	Biological Process	1	E2R357
3	GO:0044419	interspecies interaction between organisms	Biological Process	2	Q9MZD3, F1PGC3
3	GO:0044767	single-organism developmental process	Biological Process	4	F1PP21, F1P8T3, J9NVT1, F1P6H7
3	GO:0044237	cellular metabolic process	Biological Process	14	E2RL75, F1PP21, F1PBK6, Q9MZD3, J9NVE9, F1PGS2, C4MW55, F1PPB6, E2R7Z9, J9NU05, Q0QEN2, E2R5U8, E2R2C3, F1P8T3
3	GO:0045927	positive regulation of growth	Biological Process	1	F1P8T3
3	GO:0006807	nitrogen compound metabolic process	Biological Process	8	E2RL75, F1PBK6, F1PPB6, J9NU05, J9NVE9, Q0QEN2, E2R2C3, C4MW55
3	GO:0048585	negative regulation of response to stimulus	Biological Process	1	F1PGS2
3	GO:0048583	regulation of response to stimulus	Biological Process	3	J9NVE9, F1P8T3, F1PGS2
3	GO:0044707	single-multicellular organism process	Biological Process	6	F1PP21, F1P8G0, F1P8T3, F1PGS2, J9NVT1, F1PBL4
3	GO:0051094	positive regulation of developmental process	Biological Process	1	F1P8T3
3	GO:0051641	cellular localization	Biological Process	3	J9NU17, F1PH83, F6X5M3
3	GO:0033036	macromolecule localization	Biological Process	3	F1PH83, F6X5M3, F1PGS2
3	GO:0044700	single organism signaling	Biological Process	5	J9NVE9, F1P8G0, F1P8T3, F1PGS2, F1PBL4
3	GO:0048856	anatomical structure development	Biological Process	4	F1PP21, F1P8T3, J9NVT1, F1P6H7
3	GO:1900047	negative regulation of hemostasis	Biological Process	1	F1PGS2
3	GO:0009605	response to external stimulus	Biological Process	4	J9PB81, F1P8T3, F1PGC3, F1PGS2
3	GO:0043900	regulation of multi-organism process	Biological Process	1	Q9MZD3
3	GO:0009056	catabolic process	Biological Process	4	F1PPB6, J9NVE9, J9NU05, E2R2C3
3	GO:0098602	single organism cell adhesion	Biological Process	1	F1PGS2
3	GO:0042445	hormone metabolic process	Biological Process	1	E2R5U8
3	GO:0003008	system process	Biological Process	2	J9NU17, F1PGS2
3	GO:0044710	single-organism metabolic process	Biological Process	12	F1PBK6, F1PPB6, J9NU05, J9NVE9, Q0QEN2, E2R5U8, F1Q432, E2R2C3, F1P8T3, F1PGS2, J9NWJ5, C4MW55
3	GO:0023056	positive regulation of signaling	Biological Process	3	J9NVE9, F1P8T3, F1PGS2
3	GO:0044703	multi-organism reproductive process	Biological Process	1	E2R357
3	GO:0009058	biosynthetic process	Biological Process	5	E2R7Z9, J9NVE9, J9NU05, Q0QEN2, E2R2C3
3	GO:0009893	positive regulation of metabolic process	Biological Process	3	J9NVE9, F1P8T3, F1PGS2
3	GO:0051050	positive regulation of transport	Biological Process	1	F1PGS2
3	GO:0071704	organic substance metabolic process	Biological Process	17	E2RL75, F1PP21, Q9MZD3, J9NVE9, F1Q432, F1PGS2, F1P6H7, J9NWJ5, C4MW55, F1PPB6, E2R7Z9, J9NU05, J9PB81, Q0QEN2, E2R5U8, E2R2C3, F1P8T3
3	GO:0040012	regulation of locomotion	Biological Process	1	F1P8T3
3	GO:0048522	positive regulation of cellular process	Biological Process	7	F1PP21, J9NVE9, F1P8G0, F1P8T3, F1PGS2, F1P6H7, F1PBL4
3	GO:0044702	single organism reproductive process	Biological Process	2	E2R357, J9NVT1
3	GO:0050794	regulation of cellular process	Biological Process	11	F1PP21, F1PF31, Q9MZD3, J9NVE9, F1PDY8, F1P8G0, F1P8T3, F1PGS2, F1P6H7, J9NWJ5, F1PBL4
3	GO:0051716	cellular response to stimulus	Biological Process	6	J9NVE9, F1P8G0, F1P8T3, F1PGC3, F1PGS2, F1PBL4
3	GO:0023051	regulation of signaling	Biological Process	3	J9NVE9, F1P8T3, F1PGS2
3	GO:0045785	positive regulation of cell adhesion	Biological Process	1	F1PGS2
3	GO:0048589	developmental growth	Biological Process	1	F1P8T3
3	GO:0032504	multicellular organism reproduction	Biological Process	1	E2R357
3	GO:1900046	regulation of hemostasis	Biological Process	1	F1PGS2
3	GO:0007155	cell adhesion	Biological Process	3	F1PF31, F1PGS2, F1P6H7
3	GO:0044763	single-organism cellular process	Biological Process	20	F1PP21, F1PBK6, E2REU6, J9NVE9, F1Q432, F1PGS2, F1P6H7, J9NWJ5, F1PBL4, C4MW55, F1PPB6, J9NU05, Q0QEN2, F1PDY8, E2R357, F1P8G0, E2R5U8, F1P8T3, E2R2C3, J9NVT1
3	GO:0006955	immune response	Biological Process	2	F1P8T3, F1PGS2
3	GO:0065008	regulation of biological quality	Biological Process	6	E2R5U8, F1P8G0, F1P8T3, F1PGS2, J9NWJ5, F1PBL4
3	GO:0009653	anatomical structure morphogenesis	Biological Process	2	F1PP21, F1P8T3
3	GO:0044085	cellular component biogenesis	Biological Process	3	F1P8G0, F1PGS2, F1PBL4
3	GO:0019222	regulation of metabolic process	Biological Process	5	F1PP21, J9NVE9, F1P8T3, F1PGS2, F1P6H7
3	GO:0051707	response to other organism	Biological Process	3	J9PB81, F1PGC3, F1PGS2
3	GO:1904951	positive regulation of establishment of protein localization	Biological Process	1	F1PGS2
3	GO:0050793	regulation of developmental process	Biological Process	1	F1P8T3
3	GO:0048523	negative regulation of cellular process	Biological Process	3	F1PP21, J9NVE9, F1PGS2
3	GO:0030155	regulation of cell adhesion	Biological Process	1	F1PGS2
3	GO:0051239	regulation of multicellular organismal process	Biological Process	3	F1PP21, F1P8T3, F1PGS2
3	GO:0006457	protein folding	Biological Process	1	Q9MZD3
3	GO:0042221	response to chemical	Biological Process	4	F1PDY8, J9NVE9, F1PGC3, F1PGS2
4	GO:0022603	regulation of anatomical structure morphogenesis	Biological Process	1	F1P8T3
4	GO:0019725	cellular homeostasis	Biological Process	1	J9NWJ5
4	GO:0010817	regulation of hormone levels	Biological Process	2	E2R5U8, F1PGS2
4	GO:0006725	cellular aromatic compound metabolic process	Biological Process	7	E2RL75, F1PPB6, J9NVE9, J9NU05, Q0QEN2, E2R2C3, C4MW55
4	GO:0070727	cellular macromolecule localization	Biological Process	2	F1PH83, F6X5M3
4	GO:0046883	regulation of hormone secretion	Biological Process	1	F1PGS2
4	GO:0009617	response to bacterium	Biological Process	1	F1PGS2
4	GO:0048731	system development	Biological Process	3	F1PP21, F1P8T3, J9NVT1
4	GO:0032102	negative regulation of response to external stimulus	Biological Process	1	F1PGS2
4	GO:0003205	cardiac chamber development	Biological Process	1	F1PP21
4	GO:0043933	macromolecular complex subunit organization	Biological Process	4	F1P8G0, F1Q432, F1PGS2, F1PBL4
4	GO:0044403	symbiosis, encompassing mutualism through parasitism	Biological Process	2	Q9MZD3, F1PGC3
4	GO:0050817	coagulation	Biological Process	3	F1P8G0, F1PGS2, F1PBL4
4	GO:0030030	cell projection organization	Biological Process	1	F1P8T3
4	GO:0045595	regulation of cell differentiation	Biological Process	1	F1P8T3
4	GO:0009889	regulation of biosynthetic process	Biological Process	1	J9NVE9
4	GO:0006952	defense response	Biological Process	2	J9NVE9, F1PGS2
4	GO:0044711	single-organism biosynthetic process	Biological Process	3	Q0QEN2, J9NU05, E2R2C3
4	GO:0046907	intracellular transport	Biological Process	2	F1PH83, F6X5M3
4	GO:0035383	thioester metabolic process	Biological Process	1	E2R7Z9
4	GO:0032989	cellular component morphogenesis	Biological Process	1	F1P8T3
4	GO:1901657	glycosyl compound metabolic process	Biological Process	4	Q0QEN2, J9NU05, E2R2C3, C4MW55
4	GO:0031325	positive regulation of cellular metabolic process	Biological Process	3	J9NVE9, F1P8T3, F1PGS2
4	GO:0010646	regulation of cell communication	Biological Process	3	J9NVE9, F1P8T3, F1PGS2
4	GO:0009611	response to wounding	Biological Process	3	F1P8G0, F1PGS2, F1PBL4
4	GO:0072378	blood coagulation, fibrin clot formation	Biological Process	1	F1PGS2
4	GO:0044712	single-organism catabolic process	Biological Process	4	F1PPB6, J9NU05, J9NVE9, E2R2C3
4	GO:0055086	nucleobase-containing small molecule metabolic process	Biological Process	5	F1PPB6, J9NU05, Q0QEN2, E2R2C3, C4MW55
4	GO:0006793	phosphorus metabolic process	Biological Process	8	F1PPB6, J9NVE9, J9NU05, Q0QEN2, F1P8T3, E2R2C3, F1PGS2, C4MW55
4	GO:0009896	positive regulation of catabolic process	Biological Process	1	J9NVE9
4	GO:0001503	ossification	Biological Process	1	F1P8T3
4	GO:0051962	positive regulation of nervous system development	Biological Process	1	F1P8T3
4	GO:0044262	cellular carbohydrate metabolic process	Biological Process	1	E2R2C3
4	GO:0007276	gamete generation	Biological Process	1	E2R357
4	GO:0006081	cellular aldehyde metabolic process	Biological Process	2	F1PPB6, E2R2C3
4	GO:0046483	heterocycle metabolic process	Biological Process	7	E2RL75, F1PPB6, J9NVE9, J9NU05, Q0QEN2, E2R2C3, C4MW55
4	GO:0006959	humoral immune response	Biological Process	1	F1PGS2
4	GO:0098542	defense response to other organism	Biological Process	1	F1PGS2
4	GO:0048513	animal organ development	Biological Process	3	F1PP21, F1P8T3, J9NVT1
4	GO:0022607	cellular component assembly	Biological Process	3	F1P8G0, F1PGS2, F1PBL4
4	GO:0008104	protein localization	Biological Process	3	F1PH83, F6X5M3, F1PGS2
4	GO:1901575	organic substance catabolic process	Biological Process	4	F1PPB6, J9NVE9, J9NU05, E2R2C3
4	GO:0007507	heart development	Biological Process	1	F1PP21
4	GO:0050877	neurological system process	Biological Process	1	J9NU17
4	GO:0045454	cell redox homeostasis	Biological Process	1	J9NWJ5
4	GO:0010647	positive regulation of cell communication	Biological Process	3	J9NVE9, F1P8T3, F1PGS2
4	GO:0032535	regulation of cellular component size	Biological Process	1	F1P8T3
4	GO:0051130	positive regulation of cellular component organization	Biological Process	1	F1P8T3
4	GO:1903532	positive regulation of secretion by cell	Biological Process	1	F1PGS2
4	GO:0051649	establishment of localization in cell	Biological Process	2	F1PH83, F6X5M3
4	GO:0050819	negative regulation of coagulation	Biological Process	1	F1PGS2
4	GO:0044765	single-organism transport	Biological Process	9	F1PYZ1, P60529, J9JHF7, Q0QEN2, E2R5U8, F1PGS2, J9JHZ3, C4MW55, P60524
4	GO:0009966	regulation of signal transduction	Biological Process	3	J9NVE9, F1P8T3, F1PGS2
4	GO:0042127	regulation of cell proliferation	Biological Process	1	F1PF31
4	GO:0019538	protein metabolic process	Biological Process	5	Q9MZD3, J9NVE9, J9PB81, F1P8T3, F1PGS2
4	GO:0015980	energy derivation by oxidation of organic compounds	Biological Process	1	C4MW55
4	GO:0018904	ether metabolic process	Biological Process	1	J9NWJ5
4	GO:0019637	organophosphate metabolic process	Biological Process	5	F1PPB6, J9NU05, Q0QEN2, E2R2C3, C4MW55
4	GO:0050878	regulation of body fluid levels	Biological Process	3	F1P8G0, F1PGS2, F1PBL4
4	GO:0016337	single organismal cell-cell adhesion	Biological Process	1	F1PGS2
4	GO:0009968	negative regulation of signal transduction	Biological Process	1	F1PGS2
4	GO:0030195	negative regulation of blood coagulation	Biological Process	1	F1PGS2
4	GO:0010035	response to inorganic substance	Biological Process	1	F1PGS2
4	GO:0043062	extracellular structure organization	Biological Process	1	F1Q432
4	GO:0060560	developmental growth involved in morphogenesis	Biological Process	1	F1P8T3
4	GO:0043903	regulation of symbiosis, encompassing mutualism through parasitism	Biological Process	1	Q9MZD3
4	GO:0032940	secretion by cell	Biological Process	1	F1PGS2
4	GO:0080090	regulation of primary metabolic process	Biological Process	4	F1PP21, J9NVE9, F1P8T3, F1PGS2
4	GO:1903530	regulation of secretion by cell	Biological Process	1	F1PGS2
4	GO:0051186	cofactor metabolic process	Biological Process	4	F1PPB6, E2R7Z9, J9NU05, E2R2C3
4	GO:0051128	regulation of cellular component organization	Biological Process	1	F1P8T3
4	GO:0044057	regulation of system process	Biological Process	1	F1PGS2
4	GO:0010941	regulation of cell death	Biological Process	1	F1PGS2
4	GO:1903524	positive regulation of blood circulation	Biological Process	1	F1PGS2
4	GO:0070271	protein complex biogenesis	Biological Process	3	F1P8G0, F1PGS2, F1PBL4
4	GO:1901135	carbohydrate derivative metabolic process	Biological Process	5	F1PPB6, Q0QEN2, J9NU05, E2R2C3, C4MW55
4	GO:1901360	organic cyclic compound metabolic process	Biological Process	7	E2RL75, F1PPB6, J9NVE9, J9NU05, Q0QEN2, E2R2C3, C4MW55
4	GO:0007267	cell-cell signaling	Biological Process	1	F1PGS2
4	GO:0016032	viral process	Biological Process	2	Q9MZD3, F1PGC3
4	GO:0051047	positive regulation of secretion	Biological Process	1	F1PGS2
4	GO:0022407	regulation of cell-cell adhesion	Biological Process	1	F1PGS2
4	GO:0006810	transport	Biological Process	11	F1PYZ1, P60529, J9JHF7, F1PH83, Q0QEN2, F6X5M3, E2R5U8, J9JHZ3, F1PGS2, C4MW55, P60524
4	GO:2000026	regulation of multicellular organismal development	Biological Process	1	F1P8T3
4	GO:0010605	negative regulation of macromolecule metabolic process	Biological Process	1	J9NVE9
4	GO:0001817	regulation of cytokine production	Biological Process	1	F1PP21
4	GO:0001775	cell activation	Biological Process	3	F1P8G0, F1PGS2, F1PBL4
4	GO:0006928	movement of cell or subcellular component	Biological Process	1	F1P8T3
4	GO:0007154	cell communication	Biological Process	5	J9NVE9, F1P8G0, F1P8T3, F1PGS2, F1PBL4
4	GO:0060627	regulation of vesicle-mediated transport	Biological Process	1	F1PGS2
4	GO:0044281	small molecule metabolic process	Biological Process	8	F1PBK6, F1PPB6, J9NU05, Q0QEN2, E2R5U8, E2R2C3, J9NWJ5, C4MW55
4	GO:0009615	response to virus	Biological Process	1	F1PGC3
4	GO:0010604	positive regulation of macromolecule metabolic process	Biological Process	3	J9NVE9, F1P8T3, F1PGS2
4	GO:0043207	response to external biotic stimulus	Biological Process	3	J9PB81, F1PGC3, F1PGS2
4	GO:0044248	cellular catabolic process	Biological Process	2	F1PPB6, J9NVE9
4	GO:0006996	organelle organization	Biological Process	1	E2R357
4	GO:0010033	response to organic substance	Biological Process	1	F1PGC3
4	GO:0005975	carbohydrate metabolic process	Biological Process	2	J9NU05, E2R2C3
4	GO:0098609	cell-cell adhesion	Biological Process	1	F1PGS2
4	GO:0030307	positive regulation of cell growth	Biological Process	1	F1P8T3
4	GO:0051640	organelle localization	Biological Process	1	J9NU17
4	GO:0009967	positive regulation of signal transduction	Biological Process	3	J9NVE9, F1P8T3, F1PGS2
4	GO:0019730	antimicrobial humoral response	Biological Process	1	F1PGS2
4	GO:0090066	regulation of anatomical structure size	Biological Process	2	F1P8T3, F1PGS2
4	GO:0006629	lipid metabolic process	Biological Process	2	J9NVE9, E2R5U8
4	GO:0032880	regulation of protein localization	Biological Process	1	F1PGS2
4	GO:0022409	positive regulation of cell-cell adhesion	Biological Process	1	F1PGS2
4	GO:0048639	positive regulation of developmental growth	Biological Process	1	F1P8T3
4	GO:1901564	organonitrogen compound metabolic process	Biological Process	5	F1PPB6, Q0QEN2, J9NU05, E2R2C3, C4MW55
4	GO:0060255	regulation of macromolecule metabolic process	Biological Process	5	F1PP21, J9NVE9, F1P8T3, F1PGS2, F1P6H7
4	GO:0003013	circulatory system process	Biological Process	1	F1PGS2
4	GO:0051270	regulation of cellular component movement	Biological Process	1	F1P8T3
4	GO:0044249	cellular biosynthetic process	Biological Process	3	E2R7Z9, Q0QEN2, J9NVE9
4	GO:0080134	regulation of response to stress	Biological Process	1	F1PGS2
4	GO:0045834	positive regulation of lipid metabolic process	Biological Process	1	J9NVE9
4	GO:0051222	positive regulation of protein transport	Biological Process	1	F1PGS2
4	GO:0034641	cellular nitrogen compound metabolic process	Biological Process	7	E2RL75, F1PPB6, J9NVE9, J9NU05, Q0QEN2, E2R2C3, C4MW55
4	GO:0022900	electron transport chain	Biological Process	1	C4MW55
4	GO:0044255	cellular lipid metabolic process	Biological Process	2	J9NVE9, E2R5U8
4	GO:0010648	negative regulation of cell communication	Biological Process	1	F1PGS2
4	GO:0005984	disaccharide metabolic process	Biological Process	1	E2R2C3
4	GO:0030193	regulation of blood coagulation	Biological Process	1	F1PGS2
4	GO:0031589	cell-substrate adhesion	Biological Process	1	F1PGS2
4	GO:0031324	negative regulation of cellular metabolic process	Biological Process	1	J9NVE9
4	GO:0007165	signal transduction	Biological Process	5	J9NVE9, F1P8G0, F1P8T3, F1PGS2, F1PBL4
4	GO:0006790	sulfur compound metabolic process	Biological Process	1	E2R7Z9
4	GO:0051171	regulation of nitrogen compound metabolic process	Biological Process	1	J9NVE9
4	GO:1901615	organic hydroxy compound metabolic process	Biological Process	1	E2R5U8
4	GO:0045184	establishment of protein localization	Biological Process	3	F1PH83, F6X5M3, F1PGS2
4	GO:0051172	negative regulation of nitrogen compound metabolic process	Biological Process	1	J9NVE9
4	GO:0051049	regulation of transport	Biological Process	1	F1PGS2
4	GO:0001558	regulation of cell growth	Biological Process	1	F1P8T3
4	GO:0042592	homeostatic process	Biological Process	1	J9NWJ5
4	GO:0006730	one-carbon metabolic process	Biological Process	1	F1PBK6
4	GO:0009888	tissue development	Biological Process	1	F1PP21
4	GO:0055114	oxidation-reduction process	Biological Process	2	J9NU05, C4MW55
4	GO:0070887	cellular response to chemical stimulus	Biological Process	1	F1PGC3
4	GO:0050792	regulation of viral process	Biological Process	1	Q9MZD3
4	GO:0034754	cellular hormone metabolic process	Biological Process	1	E2R5U8
4	GO:0048638	regulation of developmental growth	Biological Process	1	F1P8T3
4	GO:0031323	regulation of cellular metabolic process	Biological Process	4	F1PP21, J9NVE9, F1P8T3, F1PGS2
4	GO:1903035	negative regulation of response to wounding	Biological Process	1	F1PGS2
4	GO:0048588	developmental cell growth	Biological Process	1	F1P8T3
4	GO:0060548	negative regulation of cell death	Biological Process	1	F1PGS2
4	GO:0006139	nucleobase-containing compound metabolic process	Biological Process	7	E2RL75, F1PPB6, J9NVE9, J9NU05, Q0QEN2, E2R2C3, C4MW55
4	GO:0007275	multicellular organism development	Biological Process	3	F1PP21, F1P8T3, J9NVT1
4	GO:0045597	positive regulation of cell differentiation	Biological Process	1	F1P8T3
4	GO:0048468	cell development	Biological Process	2	F1PP21, F1P8T3
4	GO:0003206	cardiac chamber morphogenesis	Biological Process	1	F1PP21
4	GO:0009890	negative regulation of biosynthetic process	Biological Process	1	J9NVE9
4	GO:0044260	cellular macromolecule metabolic process	Biological Process	6	E2RL75, Q9MZD3, J9NVE9, F1P8T3, E2R2C3, F1PGS2
4	GO:0044723	single-organism carbohydrate metabolic process	Biological Process	2	J9NU05, E2R2C3
4	GO:0023014	signal transduction by protein phosphorylation	Biological Process	3	J9NVE9, F1P8T3, F1PGS2
4	GO:0048869	cellular developmental process	Biological Process	2	F1PP21, F1P8T3
4	GO:1901576	organic substance biosynthetic process	Biological Process	5	E2R7Z9, J9NVE9, J9NU05, Q0QEN2, E2R2C3
4	GO:0032101	regulation of response to external stimulus	Biological Process	2	F1P8T3, F1PGS2
4	GO:0009887	animal organ morphogenesis	Biological Process	1	F1PP21
4	GO:0046887	positive regulation of hormone secretion	Biological Process	1	F1PGS2
4	GO:0006082	organic acid metabolic process	Biological Process	2	J9NU05, E2R2C3
4	GO:0001816	cytokine production	Biological Process	1	F1PP21
4	GO:0006091	generation of precursor metabolites and energy	Biological Process	3	J9NU05, E2R2C3, C4MW55
4	GO:0043170	macromolecule metabolic process	Biological Process	9	E2RL75, F1PP21, Q9MZD3, J9NVE9, J9PB81, F1P8T3, E2R2C3, F1PGS2, F1P6H7
4	GO:0001819	positive regulation of cytokine production	Biological Process	1	F1PP21
4	GO:0050818	regulation of coagulation	Biological Process	1	F1PGS2
4	GO:0009894	regulation of catabolic process	Biological Process	1	J9NVE9
4	GO:0008219	cell death	Biological Process	1	F1PGS2
5	GO:0071310	cellular response to organic substance	Biological Process	1	F1PGC3
5	GO:0050996	positive regulation of lipid catabolic process	Biological Process	1	J9NVE9
5	GO:0010468	regulation of gene expression	Biological Process	2	F1PP21, J9NVE9
5	GO:0072524	pyridine-containing compound metabolic process	Biological Process	3	F1PPB6, J9NU05, E2R2C3
5	GO:1901136	carbohydrate derivative catabolic process	Biological Process	1	F1PPB6
5	GO:0010038	response to metal ion	Biological Process	1	F1PGS2
5	GO:0090276	regulation of peptide hormone secretion	Biological Process	1	F1PGS2
5	GO:0000165	MAPK cascade	Biological Process	3	J9NVE9, F1P8T3, F1PGS2
5	GO:0019216	regulation of lipid metabolic process	Biological Process	1	J9NVE9
5	GO:0090304	nucleic acid metabolic process	Biological Process	2	E2RL75, J9NVE9
5	GO:0019058	viral life cycle	Biological Process	1	Q9MZD3
5	GO:0043069	negative regulation of programmed cell death	Biological Process	1	F1PGS2
5	GO:0034655	nucleobase-containing compound catabolic process	Biological Process	1	F1PPB6
5	GO:0012501	programmed cell death	Biological Process	1	F1PGS2
5	GO:0003018	vascular process in circulatory system	Biological Process	1	F1PGS2
5	GO:1901605	alpha-amino acid metabolic process	Biological Process	1	J9NU05
5	GO:0090407	organophosphate biosynthetic process	Biological Process	1	Q0QEN2
5	GO:0035384	thioester biosynthetic process	Biological Process	1	E2R7Z9
5	GO:0051188	cofactor biosynthetic process	Biological Process	1	E2R7Z9
5	GO:0034097	response to cytokine	Biological Process	1	F1PGC3
5	GO:0045907	positive regulation of vasoconstriction	Biological Process	1	F1PGS2
5	GO:0010720	positive regulation of cell development	Biological Process	1	F1P8T3
5	GO:0009914	hormone transport	Biological Process	2	E2R5U8, F1PGS2
5	GO:1903900	regulation of viral life cycle	Biological Process	1	Q9MZD3
5	GO:0005996	monosaccharide metabolic process	Biological Process	2	J9NU05, E2R2C3
5	GO:0090087	regulation of peptide transport	Biological Process	1	F1PGS2
5	GO:0007166	cell surface receptor signaling pathway	Biological Process	2	F1P8T3, F1PGS2
5	GO:0006811	ion transport	Biological Process	2	Q0QEN2, C4MW55
5	GO:0034613	cellular protein localization	Biological Process	2	F1PH83, F6X5M3
5	GO:0061045	negative regulation of wound healing	Biological Process	1	F1PGS2
5	GO:0042742	defense response to bacterium	Biological Process	1	F1PGS2
5	GO:0050714	positive regulation of protein secretion	Biological Process	1	F1PGS2
5	GO:0051174	regulation of phosphorus metabolic process	Biological Process	3	J9NVE9, F1P8T3, F1PGS2
5	GO:0006796	phosphate-containing compound metabolic process	Biological Process	8	F1PPB6, J9NVE9, J9NU05, Q0QEN2, F1P8T3, E2R2C3, F1PGS2, C4MW55
5	GO:0016192	vesicle-mediated transport	Biological Process	2	F6X5M3, F1PGS2
5	GO:0035150	regulation of tube size	Biological Process	1	F1PGS2
5	GO:0090277	positive regulation of peptide hormone secretion	Biological Process	1	F1PGS2
5	GO:0019439	aromatic compound catabolic process	Biological Process	1	F1PPB6
5	GO:1903522	regulation of blood circulation	Biological Process	1	F1PGS2
5	GO:0044272	sulfur compound biosynthetic process	Biological Process	1	E2R7Z9
5	GO:0019731	antibacterial humoral response	Biological Process	1	F1PGS2
5	GO:0044271	cellular nitrogen compound biosynthetic process	Biological Process	2	Q0QEN2, J9NVE9
5	GO:0031326	regulation of cellular biosynthetic process	Biological Process	1	J9NVE9
5	GO:0006508	proteolysis	Biological Process	2	J9PB81, F1PGS2
5	GO:0043412	macromolecule modification	Biological Process	4	Q9MZD3, J9NVE9, F1P8T3, F1PGS2
5	GO:0008015	blood circulation	Biological Process	1	F1PGS2
5	GO:1901361	organic cyclic compound catabolic process	Biological Process	1	F1PPB6
5	GO:1990138	neuron projection extension	Biological Process	1	F1P8T3
5	GO:0044264	cellular polysaccharide metabolic process	Biological Process	1	E2R2C3
5	GO:0051253	negative regulation of RNA metabolic process	Biological Process	1	J9NVE9
5	GO:0007160	cell-matrix adhesion	Biological Process	1	F1PGS2
5	GO:0016052	carbohydrate catabolic process	Biological Process	2	J9NU05, E2R2C3
5	GO:0035556	intracellular signal transduction	Biological Process	3	J9NVE9, F1P8T3, F1PGS2
5	GO:0005985	sucrose metabolic process	Biological Process	1	E2R2C3
5	GO:0019693	ribose phosphate metabolic process	Biological Process	5	F1PPB6, Q0QEN2, J9NU05, E2R2C3, C4MW55
5	GO:0008361	regulation of cell size	Biological Process	1	F1P8T3
5	GO:0034116	positive regulation of heterotypic cell-cell adhesion	Biological Process	1	F1PGS2
5	GO:0031327	negative regulation of cellular biosynthetic process	Biological Process	1	J9NVE9
5	GO:0097190	apoptotic signaling pathway	Biological Process	1	F1PGS2
5	GO:0051246	regulation of protein metabolic process	Biological Process	3	J9NVE9, F1P8T3, F1PGS2
5	GO:0009059	macromolecule biosynthetic process	Biological Process	1	J9NVE9
5	GO:0055085	transmembrane transport	Biological Process	1	Q0QEN2
5	GO:0061387	regulation of extent of cell growth	Biological Process	1	F1P8T3
5	GO:0048232	male gamete generation	Biological Process	1	E2R357
5	GO:0000904	cell morphogenesis involved in differentiation	Biological Process	1	F1P8T3
5	GO:0072359	circulatory system development	Biological Process	1	F1PP21
5	GO:0002793	positive regulation of peptide secretion	Biological Process	1	F1PGS2
5	GO:0005976	polysaccharide metabolic process	Biological Process	1	E2R2C3
5	GO:0045333	cellular respiration	Biological Process	1	C4MW55
5	GO:0006753	nucleoside phosphate metabolic process	Biological Process	5	F1PPB6, J9NU05, Q0QEN2, E2R2C3, C4MW55
5	GO:0051648	vesicle localization	Biological Process	1	J9NU17
5	GO:0006662	glycerol ether metabolic process	Biological Process	1	J9NWJ5
5	GO:0003007	heart morphogenesis	Biological Process	1	F1PP21
5	GO:0006954	inflammatory response	Biological Process	1	J9NVE9
5	GO:0006461	protein complex assembly	Biological Process	3	F1P8G0, F1PGS2, F1PBL4
5	GO:0022604	regulation of cell morphogenesis	Biological Process	1	F1P8T3
5	GO:0030154	cell differentiation	Biological Process	2	F1PP21, F1P8T3
5	GO:0031346	positive regulation of cell projection organization	Biological Process	1	F1P8T3
5	GO:0016070	RNA metabolic process	Biological Process	2	E2RL75, J9NVE9
5	GO:0045165	cell fate commitment	Biological Process	1	F1PP21
5	GO:0007599	hemostasis	Biological Process	3	F1P8G0, F1PGS2, F1PBL4
5	GO:0051604	protein maturation	Biological Process	1	F1PGS2
5	GO:1902531	regulation of intracellular signal transduction	Biological Process	3	J9NVE9, F1P8T3, F1PGS2
5	GO:0032270	positive regulation of cellular protein metabolic process	Biological Process	3	J9NVE9, F1P8T3, F1PGS2
5	GO:0016042	lipid catabolic process	Biological Process	1	J9NVE9
5	GO:0010629	negative regulation of gene expression	Biological Process	1	J9NVE9
5	GO:0019079	viral genome replication	Biological Process	1	Q9MZD3
5	GO:0010770	positive regulation of cell morphogenesis involved in differentiation	Biological Process	1	F1P8T3
5	GO:0050994	regulation of lipid catabolic process	Biological Process	1	J9NVE9
5	GO:1901362	organic cyclic compound biosynthetic process	Biological Process	2	Q0QEN2, J9NVE9
5	GO:0019219	regulation of nucleobase-containing compound metabolic process	Biological Process	1	J9NVE9
5	GO:0030168	platelet activation	Biological Process	3	F1P8G0, F1PGS2, F1PBL4
5	GO:0007417	central nervous system development	Biological Process	1	F1PP21
5	GO:0034654	nucleobase-containing compound biosynthetic process	Biological Process	2	Q0QEN2, J9NVE9
5	GO:0022904	respiratory electron transport chain	Biological Process	1	C4MW55
5	GO:0044270	cellular nitrogen compound catabolic process	Biological Process	1	F1PPB6
5	GO:0006119	oxidative phosphorylation	Biological Process	1	C4MW55
5	GO:0006757	ATP generation from ADP	Biological Process	2	J9NU05, E2R2C3
5	GO:0023061	signal release	Biological Process	1	F1PGS2
5	GO:0000902	cell morphogenesis	Biological Process	1	F1P8T3
5	GO:0019438	aromatic compound biosynthetic process	Biological Process	2	Q0QEN2, J9NVE9
5	GO:0009306	protein secretion	Biological Process	1	F1PGS2
5	GO:0010558	negative regulation of macromolecule biosynthetic process	Biological Process	1	J9NVE9
5	GO:0065003	macromolecular complex assembly	Biological Process	3	F1P8G0, F1PGS2, F1PBL4
5	GO:0034645	cellular macromolecule biosynthetic process	Biological Process	1	J9NVE9
5	GO:0070201	regulation of establishment of protein localization	Biological Process	1	F1PGS2
5	GO:0046903	secretion	Biological Process	1	F1PGS2
5	GO:0018130	heterocycle biosynthetic process	Biological Process	2	Q0QEN2, J9NVE9
5	GO:0006637	acyl-CoA metabolic process	Biological Process	1	E2R7Z9
5	GO:0044267	cellular protein metabolic process	Biological Process	4	Q9MZD3, J9NVE9, F1P8T3, F1PGS2
5	GO:0006818	hydrogen transport	Biological Process	2	Q0QEN2, C4MW55
5	GO:2001233	regulation of apoptotic signaling pathway	Biological Process	1	F1PGS2
5	GO:1901137	carbohydrate derivative biosynthetic process	Biological Process	1	Q0QEN2
5	GO:0010467	gene expression	Biological Process	4	E2RL75, F1PP21, J9NVE9, F1PGS2
5	GO:0030516	regulation of axon extension	Biological Process	1	F1P8T3
5	GO:0001649	osteoblast differentiation	Biological Process	1	F1P8T3
5	GO:0006732	coenzyme metabolic process	Biological Process	4	F1PPB6, E2R7Z9, J9NU05, E2R2C3
5	GO:1902533	positive regulation of intracellular signal transduction	Biological Process	3	J9NVE9, F1P8T3, F1PGS2
5	GO:0072521	purine-containing compound metabolic process	Biological Process	4	Q0QEN2, J9NU05, E2R2C3, C4MW55
5	GO:0044242	cellular lipid catabolic process	Biological Process	1	J9NVE9
5	GO:0016051	carbohydrate biosynthetic process	Biological Process	2	J9NU05, E2R2C3
5	GO:0015669	gas transport	Biological Process	5	F1PYZ1, P60529, J9JHF7, J9JHZ3, P60524
5	GO:0046700	heterocycle catabolic process	Biological Process	1	F1PPB6
5	GO:0032990	cell part morphogenesis	Biological Process	1	F1P8T3
5	GO:1901566	organonitrogen compound biosynthetic process	Biological Process	1	Q0QEN2
5	GO:0017157	regulation of exocytosis	Biological Process	1	F1PGS2
5	GO:0046434	organophosphate catabolic process	Biological Process	1	F1PPB6
5	GO:0010562	positive regulation of phosphorus metabolic process	Biological Process	3	J9NVE9, F1P8T3, F1PGS2
5	GO:0045773	positive regulation of axon extension	Biological Process	1	F1P8T3
5	GO:0007596	blood coagulation	Biological Process	3	F1P8G0, F1PGS2, F1PBL4
5	GO:0043436	oxoacid metabolic process	Biological Process	2	J9NU05, E2R2C3
5	GO:0032268	regulation of cellular protein metabolic process	Biological Process	3	J9NVE9, F1P8T3, F1PGS2
5	GO:0051247	positive regulation of protein metabolic process	Biological Process	3	J9NVE9, F1P8T3, F1PGS2
5	GO:0051156	glucose 6-phosphate metabolic process	Biological Process	2	F1PPB6, E2R2C3
5	GO:0031344	regulation of cell projection organization	Biological Process	1	F1P8T3
5	GO:0042572	retinol metabolic process	Biological Process	1	E2R5U8
5	GO:0071822	protein complex subunit organization	Biological Process	4	F1P8G0, F1Q432, F1PGS2, F1PBL4
5	GO:0006066	alcohol metabolic process	Biological Process	1	E2R5U8
5	GO:0009262	deoxyribonucleotide metabolic process	Biological Process	1	F1PPB6
5	GO:0042730	fibrinolysis	Biological Process	1	F1PGS2
5	GO:0019682	glyceraldehyde-3-phosphate metabolic process	Biological Process	2	F1PPB6, E2R2C3
5	GO:0051046	regulation of secretion	Biological Process	1	F1PGS2
5	GO:0009311	oligosaccharide metabolic process	Biological Process	1	E2R2C3
5	GO:0006720	isoprenoid metabolic process	Biological Process	1	E2R5U8
5	GO:1901659	glycosyl compound biosynthetic process	Biological Process	1	Q0QEN2
5	GO:0048858	cell projection morphogenesis	Biological Process	1	F1P8T3
5	GO:0034114	regulation of heterotypic cell-cell adhesion	Biological Process	1	F1PGS2
5	GO:0051223	regulation of protein transport	Biological Process	1	F1PGS2
5	GO:2001234	negative regulation of apoptotic signaling pathway	Biological Process	1	F1PGS2
5	GO:1903034	regulation of response to wounding	Biological Process	1	F1PGS2
5	GO:1901292	nucleoside phosphate catabolic process	Biological Process	1	F1PPB6
5	GO:0071705	nitrogen compound transport	Biological Process	2	E2R5U8, F1PGS2
5	GO:0009116	nucleoside metabolic process	Biological Process	4	Q0QEN2, J9NU05, E2R2C3, C4MW55
5	GO:0010556	regulation of macromolecule biosynthetic process	Biological Process	1	J9NVE9
5	GO:0007399	nervous system development	Biological Process	2	F1PP21, F1P8T3
5	GO:0036211	protein modification process	Biological Process	4	Q9MZD3, J9NVE9, F1P8T3, F1PGS2
5	GO:1901293	nucleoside phosphate biosynthetic process	Biological Process	1	Q0QEN2
5	GO:0044283	small molecule biosynthetic process	Biological Process	2	J9NU05, E2R2C3
5	GO:0043067	regulation of programmed cell death	Biological Process	1	F1PGS2
5	GO:0051960	regulation of nervous system development	Biological Process	1	F1P8T3
5	GO:0034113	heterotypic cell-cell adhesion	Biological Process	1	F1PGS2
5	GO:0060284	regulation of cell development	Biological Process	1	F1P8T3
5	GO:0031175	neuron projection development	Biological Process	1	F1P8T3
5	GO:0030198	extracellular matrix organization	Biological Process	1	F1Q432
5	GO:0044724	single-organism carbohydrate catabolic process	Biological Process	2	J9NU05, E2R2C3
5	GO:0050769	positive regulation of neurogenesis	Biological Process	1	F1P8T3
5	GO:0042060	wound healing	Biological Process	3	F1P8G0, F1PGS2, F1PBL4
5	GO:0006886	intracellular protein transport	Biological Process	2	F1PH83, F6X5M3
5	GO:0048666	neuron development	Biological Process	1	F1P8T3
5	GO:0006887	exocytosis	Biological Process	1	F1PGS2
5	GO:0034109	homotypic cell-cell adhesion	Biological Process	1	F1PGS2
5	GO:0045921	positive regulation of exocytosis	Biological Process	1	F1PGS2
5	GO:0045934	negative regulation of nucleobase-containing compound metabolic process	Biological Process	1	J9NVE9
5	GO:0015031	protein transport	Biological Process	3	F1PH83, F6X5M3, F1PGS2
5	GO:0050708	regulation of protein secretion	Biological Process	1	F1PGS2
5	GO:0007600	sensory perception	Biological Process	1	J9NU17
5	GO:0071702	organic substance transport	Biological Process	4	F1PH83, F6X5M3, E2R5U8, F1PGS2
5	GO:0051252	regulation of RNA metabolic process	Biological Process	1	J9NVE9
6	GO:0010738	regulation of protein kinase A signaling	Biological Process	1	J9NVE9
6	GO:0071616	acyl-CoA biosynthetic process	Biological Process	1	E2R7Z9
6	GO:0072522	purine-containing compound biosynthetic process	Biological Process	1	Q0QEN2
6	GO:2001236	regulation of extrinsic apoptotic signaling pathway	Biological Process	1	F1PGS2
6	GO:0006733	oxidoreduction coenzyme metabolic process	Biological Process	3	F1PPB6, J9NU05, E2R2C3
6	GO:0009264	deoxyribonucleotide catabolic process	Biological Process	1	F1PPB6
6	GO:0042886	amide transport	Biological Process	1	F1PGS2
6	GO:0019229	regulation of vasoconstriction	Biological Process	1	F1PGS2
6	GO:0048812	neuron projection morphogenesis	Biological Process	1	F1P8T3
6	GO:0007283	spermatogenesis	Biological Process	1	E2R357
6	GO:0061041	regulation of wound healing	Biological Process	1	F1PGS2
6	GO:0034220	ion transmembrane transport	Biological Process	1	Q0QEN2
6	GO:1902679	negative regulation of RNA biosynthetic process	Biological Process	1	J9NVE9
6	GO:0046390	ribose phosphate biosynthetic process	Biological Process	1	Q0QEN2
6	GO:0002791	regulation of peptide secretion	Biological Process	1	F1PGS2
6	GO:0009119	ribonucleoside metabolic process	Biological Process	4	Q0QEN2, J9NU05, E2R2C3, C4MW55
6	GO:0034622	cellular macromolecular complex assembly	Biological Process	3	F1P8G0, F1PGS2, F1PBL4
6	GO:0006123	mitochondrial electron transport, cytochrome c to oxygen	Biological Process	1	C4MW55
6	GO:0042278	purine nucleoside metabolic process	Biological Process	4	Q0QEN2, J9NU05, E2R2C3, C4MW55
6	GO:0051592	response to calcium ion	Biological Process	1	F1PGS2
6	GO:0009259	ribonucleotide metabolic process	Biological Process	4	Q0QEN2, J9NU05, E2R2C3, C4MW55
6	GO:2001141	regulation of RNA biosynthetic process	Biological Process	1	J9NVE9
6	GO:0035337	fatty-acyl-CoA metabolic process	Biological Process	1	E2R7Z9
6	GO:2001237	negative regulation of extrinsic apoptotic signaling pathway	Biological Process	1	F1PGS2
6	GO:0097191	extrinsic apoptotic signaling pathway	Biological Process	1	F1PGS2
6	GO:0009123	nucleoside monophosphate metabolic process	Biological Process	4	Q0QEN2, J9NU05, E2R2C3, C4MW55
6	GO:0031399	regulation of protein modification process	Biological Process	3	J9NVE9, F1P8T3, F1PGS2
6	GO:0006355	regulation of transcription, DNA-templated	Biological Process	1	J9NVE9
6	GO:0006163	purine nucleotide metabolic process	Biological Process	4	Q0QEN2, J9NU05, E2R2C3, C4MW55
6	GO:0009166	nucleotide catabolic process	Biological Process	1	F1PPB6
6	GO:0046364	monosaccharide biosynthetic process	Biological Process	2	J9NU05, E2R2C3
6	GO:0045666	positive regulation of neuron differentiation	Biological Process	1	F1P8T3
6	GO:0019362	pyridine nucleotide metabolic process	Biological Process	3	F1PPB6, J9NU05, E2R2C3
6	GO:0045937	positive regulation of phosphate metabolic process	Biological Process	3	J9NVE9, F1P8T3, F1PGS2
6	GO:0009069	serine family amino acid metabolic process	Biological Process	1	J9NU05
6	GO:0009124	nucleoside monophosphate biosynthetic process	Biological Process	1	Q0QEN2
6	GO:0043623	cellular protein complex assembly	Biological Process	3	F1P8G0, F1PGS2, F1PBL4
6	GO:0006396	RNA processing	Biological Process	1	E2RL75
6	GO:0015671	oxygen transport	Biological Process	5	F1PYZ1, P60529, J9JHF7, J9JHZ3, P60524
6	GO:0045892	negative regulation of transcription, DNA-templated	Biological Process	1	J9NVE9
6	GO:0043410	positive regulation of MAPK cascade	Biological Process	3	J9NVE9, F1P8T3, F1PGS2
6	GO:0070327	thyroid hormone transport	Biological Process	1	E2R5U8
6	GO:0010976	positive regulation of neuron projection development	Biological Process	1	F1P8T3
6	GO:0043408	regulation of MAPK cascade	Biological Process	3	J9NVE9, F1P8T3, F1PGS2
6	GO:0010769	regulation of cell morphogenesis involved in differentiation	Biological Process	1	F1P8T3
6	GO:0006351	transcription, DNA-templated	Biological Process	1	J9NVE9
6	GO:0010975	regulation of neuron projection development	Biological Process	1	F1P8T3
6	GO:0002790	peptide secretion	Biological Process	1	F1PGS2
6	GO:0009117	nucleotide metabolic process	Biological Process	5	F1PPB6, Q0QEN2, J9NU05, E2R2C3, C4MW55
6	GO:0019220	regulation of phosphate metabolic process	Biological Process	3	J9NVE9, F1P8T3, F1PGS2
6	GO:0070371	ERK1 and ERK2 cascade	Biological Process	3	J9NVE9, F1P8T3, F1PGS2
6	GO:0007229	integrin-mediated signaling pathway	Biological Process	1	F1P8T3
6	GO:0006464	cellular protein modification process	Biological Process	4	Q9MZD3, J9NVE9, F1P8T3, F1PGS2
6	GO:0030182	neuron differentiation	Biological Process	2	F1PP21, F1P8T3
6	GO:0070527	platelet aggregation	Biological Process	1	F1PGS2
6	GO:0044042	glucan metabolic process	Biological Process	1	E2R2C3
6	GO:0046879	hormone secretion	Biological Process	1	F1PGS2
6	GO:0006098	pentose-phosphate shunt	Biological Process	2	F1PPB6, E2R2C3
6	GO:0050767	regulation of neurogenesis	Biological Process	1	F1P8T3
6	GO:0043152	induction of bacterial agglutination	Biological Process	1	F1PGS2
6	GO:0043066	negative regulation of apoptotic process	Biological Process	1	F1PGS2
6	GO:0015992	proton transport	Biological Process	2	Q0QEN2, C4MW55
6	GO:2000113	negative regulation of cellular macromolecule biosynthetic process	Biological Process	1	J9NVE9
6	GO:0006073	cellular glucan metabolic process	Biological Process	1	E2R2C3
6	GO:0048667	cell morphogenesis involved in neuron differentiation	Biological Process	1	F1P8T3
6	GO:0006915	apoptotic process	Biological Process	1	F1PGS2
6	GO:0019318	hexose metabolic process	Biological Process	2	J9NU05, E2R2C3
6	GO:0016310	phosphorylation	Biological Process	6	J9NVE9, J9NU05, F1P8T3, E2R2C3, F1PGS2, C4MW55
6	GO:0071345	cellular response to cytokine stimulus	Biological Process	1	F1PGC3
6	GO:0022008	neurogenesis	Biological Process	2	F1PP21, F1P8T3
6	GO:0061564	axon development	Biological Process	1	F1P8T3
6	GO:0045069	regulation of viral genome replication	Biological Process	1	Q9MZD3
6	GO:0010737	protein kinase A signaling	Biological Process	1	J9NVE9
6	GO:0034660	ncRNA metabolic process	Biological Process	1	E2RL75
6	GO:0090662	ATP hydrolysis coupled transmembrane transport	Biological Process	1	Q0QEN2
6	GO:0019752	carboxylic acid metabolic process	Biological Process	2	J9NU05, E2R2C3
6	GO:0035455	response to interferon-alpha	Biological Process	1	F1PGC3
6	GO:0009142	nucleoside triphosphate biosynthetic process	Biological Process	1	Q0QEN2
6	GO:0009141	nucleoside triphosphate metabolic process	Biological Process	4	Q0QEN2, J9NU05, E2R2C3, C4MW55
6	GO:0009163	nucleoside biosynthetic process	Biological Process	1	Q0QEN2
6	GO:0006096	glycolytic process	Biological Process	2	J9NU05, E2R2C3
6	GO:0006812	cation transport	Biological Process	2	Q0QEN2, C4MW55
6	GO:2000112	regulation of cellular macromolecule biosynthetic process	Biological Process	1	J9NVE9
6	GO:0050954	sensory perception of mechanical stimulus	Biological Process	1	J9NU17
6	GO:0050772	positive regulation of axonogenesis	Biological Process	1	F1P8T3
6	GO:0042773	ATP synthesis coupled electron transport	Biological Process	1	C4MW55
6	GO:0006721	terpenoid metabolic process	Biological Process	1	E2R5U8
6	GO:0002526	acute inflammatory response	Biological Process	1	J9NVE9
6	GO:0048675	axon extension	Biological Process	1	F1P8T3
6	GO:0042981	regulation of apoptotic process	Biological Process	1	F1PGS2
6	GO:0050880	regulation of blood vessel size	Biological Process	1	F1PGS2
6	GO:0034308	primary alcohol metabolic process	Biological Process	1	E2R5U8
6	GO:0009165	nucleotide biosynthetic process	Biological Process	1	Q0QEN2
6	GO:0009132	nucleoside diphosphate metabolic process	Biological Process	2	J9NU05, E2R2C3
6	GO:0032774	RNA biosynthetic process	Biological Process	1	J9NVE9
6	GO:0016485	protein processing	Biological Process	1	F1PGS2
6	GO:0015833	peptide transport	Biological Process	1	F1PGS2
6	GO:0031401	positive regulation of protein modification process	Biological Process	3	J9NVE9, F1P8T3, F1PGS2
6	GO:0010739	positive regulation of protein kinase A signaling	Biological Process	1	J9NVE9
6	GO:0009108	coenzyme biosynthetic process	Biological Process	1	E2R7Z9
6	GO:0072337	modified amino acid transport	Biological Process	1	E2R5U8
6	GO:0030199	collagen fibril organization	Biological Process	1	F1Q432
7	GO:0030072	peptide hormone secretion	Biological Process	1	F1PGS2
7	GO:0009201	ribonucleoside triphosphate biosynthetic process	Biological Process	1	Q0QEN2
7	GO:1902600	hydrogen ion transmembrane transport	Biological Process	1	Q0QEN2
7	GO:0050770	regulation of axonogenesis	Biological Process	1	F1P8T3
7	GO:0098655	cation transmembrane transport	Biological Process	1	Q0QEN2
7	GO:0006953	acute-phase response	Biological Process	1	J9NVE9
7	GO:1903506	regulation of nucleic acid-templated transcription	Biological Process	1	J9NVE9
7	GO:0016101	diterpenoid metabolic process	Biological Process	1	E2R5U8
7	GO:0006165	nucleoside diphosphate phosphorylation	Biological Process	2	J9NU05, E2R2C3
7	GO:0001934	positive regulation of protein phosphorylation	Biological Process	3	J9NVE9, F1P8T3, F1PGS2
7	GO:0042775	mitochondrial ATP synthesis coupled electron transport	Biological Process	1	C4MW55
7	GO:0009127	purine nucleoside monophosphate biosynthetic process	Biological Process	1	Q0QEN2
7	GO:0007409	axonogenesis	Biological Process	1	F1P8T3
7	GO:0034470	ncRNA processing	Biological Process	1	E2RL75
7	GO:0042310	vasoconstriction	Biological Process	1	F1PGS2
7	GO:0015991	ATP hydrolysis coupled proton transport	Biological Process	1	Q0QEN2
7	GO:0009126	purine nucleoside monophosphate metabolic process	Biological Process	4	Q0QEN2, J9NU05, E2R2C3, C4MW55
7	GO:0009199	ribonucleoside triphosphate metabolic process	Biological Process	4	J9NU05, Q0QEN2, E2R2C3, C4MW55
7	GO:1902042	negative regulation of extrinsic apoptotic signaling pathway via death domain receptors	Biological Process	1	F1PGS2
7	GO:0048699	generation of neurons	Biological Process	2	F1PP21, F1P8T3
7	GO:0018193	peptidyl-amino acid modification	Biological Process	2	Q9MZD3, J9NVE9
7	GO:0009260	ribonucleotide biosynthetic process	Biological Process	1	Q0QEN2
7	GO:0006534	cysteine metabolic process	Biological Process	1	J9NU05
7	GO:0009145	purine nucleoside triphosphate biosynthetic process	Biological Process	1	Q0QEN2
7	GO:0046939	nucleotide phosphorylation	Biological Process	2	J9NU05, E2R2C3
7	GO:1902041	regulation of extrinsic apoptotic signaling pathway via death domain receptors	Biological Process	1	F1PGS2
7	GO:0009144	purine nucleoside triphosphate metabolic process	Biological Process	4	J9NU05, Q0QEN2, E2R2C3, C4MW55
7	GO:0046949	fatty-acyl-CoA biosynthetic process	Biological Process	1	E2R7Z9
7	GO:0007605	sensory perception of sound	Biological Process	1	J9NU17
7	GO:0045664	regulation of neuron differentiation	Biological Process	1	F1P8T3
7	GO:0042455	ribonucleoside biosynthetic process	Biological Process	1	Q0QEN2
7	GO:1903507	negative regulation of nucleic acid-templated transcription	Biological Process	1	J9NVE9
7	GO:1904035	regulation of epithelial cell apoptotic process	Biological Process	1	F1PGS2
7	GO:0019319	hexose biosynthetic process	Biological Process	2	J9NU05, E2R2C3
7	GO:0097659	nucleic acid-templated transcription	Biological Process	1	J9NVE9
7	GO:0009135	purine nucleoside diphosphate metabolic process	Biological Process	2	J9NU05, E2R2C3
7	GO:1904036	negative regulation of epithelial cell apoptotic process	Biological Process	1	F1PGS2
7	GO:0032787	monocarboxylic acid metabolic process	Biological Process	2	J9NU05, E2R2C3
7	GO:0046128	purine ribonucleoside metabolic process	Biological Process	4	J9NU05, Q0QEN2, E2R2C3, C4MW55
7	GO:0042451	purine nucleoside biosynthetic process	Biological Process	1	Q0QEN2
7	GO:0006468	protein phosphorylation	Biological Process	3	J9NVE9, F1P8T3, F1PGS2
7	GO:0070374	positive regulation of ERK1 and ERK2 cascade	Biological Process	3	J9NVE9, F1P8T3, F1PGS2
7	GO:0006006	glucose metabolic process	Biological Process	2	J9NU05, E2R2C3
7	GO:0042327	positive regulation of phosphorylation	Biological Process	3	J9NVE9, F1P8T3, F1PGS2
7	GO:0001932	regulation of protein phosphorylation	Biological Process	3	J9NVE9, F1P8T3, F1PGS2
7	GO:0015672	monovalent inorganic cation transport	Biological Process	2	Q0QEN2, C4MW55
7	GO:0005982	starch metabolic process	Biological Process	1	E2R2C3
7	GO:0009150	purine ribonucleotide metabolic process	Biological Process	4	J9NU05, Q0QEN2, E2R2C3, C4MW55
7	GO:0006164	purine nucleotide biosynthetic process	Biological Process	1	Q0QEN2
7	GO:0046496	nicotinamide nucleotide metabolic process	Biological Process	3	F1PPB6, J9NU05, E2R2C3
7	GO:0070372	regulation of ERK1 and ERK2 cascade	Biological Process	3	J9NVE9, F1P8T3, F1PGS2
7	GO:0098660	inorganic ion transmembrane transport	Biological Process	1	Q0QEN2
7	GO:0031638	zymogen activation	Biological Process	1	F1PGS2
7	GO:1904019	epithelial cell apoptotic process	Biological Process	1	F1PGS2
7	GO:0016073	snRNA metabolic process	Biological Process	1	E2RL75
7	GO:0035336	long-chain fatty-acyl-CoA metabolic process	Biological Process	1	E2R7Z9
7	GO:0009156	ribonucleoside monophosphate biosynthetic process	Biological Process	1	Q0QEN2
7	GO:0051258	protein polymerization	Biological Process	3	F1P8G0, F1PGS2, F1PBL4
7	GO:0008625	extrinsic apoptotic signaling pathway via death domain receptors	Biological Process	1	F1PGS2
7	GO:0009161	ribonucleoside monophosphate metabolic process	Biological Process	4	Q0QEN2, J9NU05, E2R2C3, C4MW55
7	GO:0009185	ribonucleoside diphosphate metabolic process	Biological Process	2	J9NU05, E2R2C3
7	GO:0035457	cellular response to interferon-alpha	Biological Process	1	F1PGC3
7	GO:0042325	regulation of phosphorylation	Biological Process	3	J9NVE9, F1P8T3, F1PGS2
8	GO:0072577	endothelial cell apoptotic process	Biological Process	1	F1PGS2
8	GO:0018209	peptidyl-serine modification	Biological Process	1	J9NVE9
8	GO:0046129	purine ribonucleoside biosynthetic process	Biological Process	1	Q0QEN2
8	GO:0033138	positive regulation of peptidyl-serine phosphorylation	Biological Process	1	J9NVE9
8	GO:0009179	purine ribonucleoside diphosphate metabolic process	Biological Process	2	J9NU05, E2R2C3
8	GO:0031639	plasminogen activation	Biological Process	1	F1PGS2
8	GO:0009205	purine ribonucleoside triphosphate metabolic process	Biological Process	4	J9NU05, Q0QEN2, E2R2C3, C4MW55
8	GO:0001523	retinoid metabolic process	Biological Process	1	E2R5U8
8	GO:0046034	ATP metabolic process	Biological Process	4	J9NU05, Q0QEN2, E2R2C3, C4MW55
8	GO:0015988	energy coupled proton transmembrane transport, against electrochemical gradient	Biological Process	1	Q0QEN2
8	GO:0009152	purine ribonucleotide biosynthetic process	Biological Process	1	Q0QEN2
8	GO:0015985	energy coupled proton transport, down electrochemical gradient	Biological Process	1	Q0QEN2
8	GO:0098662	inorganic cation transmembrane transport	Biological Process	1	Q0QEN2
8	GO:0035338	long-chain fatty-acyl-CoA biosynthetic process	Biological Process	1	E2R7Z9
8	GO:2000351	regulation of endothelial cell apoptotic process	Biological Process	1	F1PGS2
8	GO:0033135	regulation of peptidyl-serine phosphorylation	Biological Process	1	J9NVE9
8	GO:0006094	gluconeogenesis	Biological Process	2	J9NU05, E2R2C3
8	GO:0009168	purine ribonucleoside monophosphate biosynthetic process	Biological Process	1	Q0QEN2
8	GO:0009167	purine ribonucleoside monophosphate metabolic process	Biological Process	4	J9NU05, Q0QEN2, E2R2C3, C4MW55
8	GO:0018208	peptidyl-proline modification	Biological Process	1	Q9MZD3
8	GO:2000352	negative regulation of endothelial cell apoptotic process	Biological Process	1	F1PGS2
8	GO:0006739	NADP metabolic process	Biological Process	2	F1PPB6, E2R2C3
8	GO:0016180	snRNA processing	Biological Process	1	E2RL75
8	GO:0018105	peptidyl-serine phosphorylation	Biological Process	1	J9NVE9
8	GO:0046031	ADP metabolic process	Biological Process	2	J9NU05, E2R2C3
8	GO:0009206	purine ribonucleoside triphosphate biosynthetic process	Biological Process	1	Q0QEN2
8	GO:0006090	pyruvate metabolic process	Biological Process	2	J9NU05, E2R2C3
9	GO:0000413	protein peptidyl-prolyl isomerization	Biological Process	1	Q9MZD3
9	GO:0006754	ATP biosynthetic process	Biological Process	1	Q0QEN2
9	GO:0015986	ATP synthesis coupled proton transport	Biological Process	1	Q0QEN2

## Sheet: mf
Level	GO ID	Term	GO Type	#Seqs	Sequence Names
1	GO:0003674	molecular_function	Molecular Function	43	J9P9B9, F1PYZ1, E2RL75, F6X5M3, F1Q432, J9NYI6, F1P6H7, J9JHZ3, F1PBL4, C4MW55, J9NYN2, J9NU17, J9JHF7, F1PPB6, J9PB81, E2R489, E2R5U8, F1P8G0, E2R2C3, J9NVT1, F1PEH9, F1Q0N9, E2RH23, F1PP21, P60529, F1P8A6, F1PBK6, E2REU6, Q9MZD3, F1PGS2, F1PTY1, J9NWJ5, E2RP87, J9P0D4, F1PF31, E2R7Z9, J9NU05, Q0QEN2, J9NWS3, F1P8T3, F1P6P2, F1PGC3, P60524
2	GO:0009055	electron carrier activity	Molecular Function	1	C4MW55
2	GO:0005215	transporter activity	Molecular Function	2	Q0QEN2, C4MW55
2	GO:0003824	catalytic activity	Molecular Function	12	F1PBK6, Q9MZD3, J9NWJ5, C4MW55, J9NU17, F1PPB6, E2R7Z9, J9NU05, Q0QEN2, J9PB81, E2R2C3, F1PEH9
2	GO:0005488	binding	Molecular Function	31	F1PYZ1, J9P9B9, E2RL75, F6X5M3, F1Q432, J9NYI6, J9JHZ3, F1P6H7, F1PBL4, C4MW55, J9NYN2, J9JHF7, J9NU17, E2R5U8, F1P8G0, J9NVT1, P60529, E2RH23, F1PP21, F1P8A6, F1PBK6, F1PGS2, E2RP87, J9P0D4, F1PF31, E2R7Z9, Q0QEN2, F1P8T3, F1P6P2, F1PGC3, P60524
2	GO:0005198	structural molecule activity	Molecular Function	7	E2REU6, E2R489, F6X5M3, J9NWS3, F1PGS2, F1PTY1, F1Q0N9
3	GO:0005515	protein binding	Molecular Function	20	J9P9B9, E2RH23, F1P8A6, F1PBK6, F6X5M3, F1Q432, J9NYI6, F1PGS2, F1P6H7, F1PBL4, E2RP87, J9P0D4, J9NU17, F1PF31, F1P8G0, E2R5U8, F1P8T3, F1P6P2, F1PGC3, J9NVT1
3	GO:0016829	lyase activity	Molecular Function	2	F1PBK6, F1PPB6
3	GO:0097159	organic cyclic compound binding	Molecular Function	9	F1PYZ1, P60529, F1PP21, J9NU17, J9JHF7, Q0QEN2, F1PGC3, J9JHZ3, P60524
3	GO:0043167	ion binding	Molecular Function	10	F1PYZ1, J9NYN2, P60529, F1PP21, E2RH23, J9JHF7, F1PBK6, J9JHZ3, P60524, C4MW55
3	GO:1901363	heterocyclic compound binding	Molecular Function	9	F1PYZ1, P60529, F1PP21, J9NU17, J9JHF7, Q0QEN2, F1PGC3, J9JHZ3, P60524
3	GO:0036094	small molecule binding	Molecular Function	2	J9NU17, Q0QEN2
3	GO:0022892	substrate-specific transporter activity	Molecular Function	2	Q0QEN2, C4MW55
3	GO:0004129	cytochrome-c oxidase activity	Molecular Function	1	C4MW55
3	GO:0022857	transmembrane transporter activity	Molecular Function	2	Q0QEN2, C4MW55
3	GO:0042562	hormone binding	Molecular Function	1	E2R5U8
3	GO:0016787	hydrolase activity	Molecular Function	5	J9NU17, F1PBK6, E2R7Z9, Q0QEN2, J9PB81
3	GO:0097367	carbohydrate derivative binding	Molecular Function	2	J9NU17, Q0QEN2
3	GO:0016874	ligase activity	Molecular Function	1	F1PEH9
3	GO:0016491	oxidoreductase activity	Molecular Function	3	J9NU05, J9NWJ5, C4MW55
3	GO:0019825	oxygen binding	Molecular Function	5	F1PYZ1, P60529, J9JHF7, J9JHZ3, P60524
3	GO:0060090	binding, bridging	Molecular Function	3	F1P8G0, F1PGS2, F1PBL4
3	GO:0008289	lipid binding	Molecular Function	1	E2R7Z9
3	GO:0016853	isomerase activity	Molecular Function	2	Q9MZD3, E2R2C3
4	GO:0015002	heme-copper terminal oxidase activity	Molecular Function	1	C4MW55
4	GO:0043169	cation binding	Molecular Function	10	F1PYZ1, J9NYN2, P60529, F1PP21, E2RH23, J9JHF7, F1PBK6, J9JHZ3, P60524, C4MW55
4	GO:0016788	hydrolase activity, acting on ester bonds	Molecular Function	2	F1PBK6, E2R7Z9
4	GO:0017171	serine hydrolase activity	Molecular Function	1	J9PB81
4	GO:0016860	intramolecular oxidoreductase activity	Molecular Function	1	E2R2C3
4	GO:0030674	protein binding, bridging	Molecular Function	3	F1P8G0, F1PGS2, F1PBL4
4	GO:0051087	chaperone binding	Molecular Function	1	F1PGS2
4	GO:0016835	carbon-oxygen lyase activity	Molecular Function	1	F1PBK6
4	GO:0050839	cell adhesion molecule binding	Molecular Function	1	F1PGS2
4	GO:0022891	substrate-specific transmembrane transporter activity	Molecular Function	2	Q0QEN2, C4MW55
4	GO:0016667	oxidoreductase activity, acting on a sulfur group of donors	Molecular Function	1	J9NWJ5
4	GO:0032553	ribonucleotide binding	Molecular Function	2	J9NU17, Q0QEN2
4	GO:0005102	receptor binding	Molecular Function	4	F1P8G0, F1P8T3, F1PGS2, F1PBL4
4	GO:0016830	carbon-carbon lyase activity	Molecular Function	1	F1PPB6
4	GO:0000166	nucleotide binding	Molecular Function	2	J9NU17, Q0QEN2
4	GO:0016817	hydrolase activity, acting on acid anhydrides	Molecular Function	2	J9NU17, Q0QEN2
4	GO:0003676	nucleic acid binding	Molecular Function	2	F1PP21, F1PGC3
4	GO:0046906	tetrapyrrole binding	Molecular Function	5	F1PYZ1, P60529, J9JHF7, J9JHZ3, P60524
4	GO:1901265	nucleoside phosphate binding	Molecular Function	2	J9NU17, Q0QEN2
4	GO:0016614	oxidoreductase activity, acting on CH-OH group of donors	Molecular Function	1	J9NU05
4	GO:0016675	oxidoreductase activity, acting on a heme group of donors	Molecular Function	1	C4MW55
4	GO:0001882	nucleoside binding	Molecular Function	2	J9NU17, Q0QEN2
4	GO:0022804	active transmembrane transporter activity	Molecular Function	1	Q0QEN2
4	GO:0016859	cis-trans isomerase activity	Molecular Function	1	Q9MZD3
4	GO:0008233	peptidase activity	Molecular Function	1	J9PB81
4	GO:0070324	thyroid hormone binding	Molecular Function	1	E2R5U8
5	GO:0015036	disulfide oxidoreductase activity	Molecular Function	1	J9NWJ5
5	GO:0016676	oxidoreductase activity, acting on a heme group of donors, oxygen as acceptor	Molecular Function	1	C4MW55
5	GO:0032555	purine ribonucleotide binding	Molecular Function	2	J9NU17, Q0QEN2
5	GO:0017076	purine nucleotide binding	Molecular Function	2	J9NU17, Q0QEN2
5	GO:0016820	hydrolase activity, acting on acid anhydrides, catalyzing transmembrane movement of substances	Molecular Function	1	Q0QEN2
5	GO:0015075	ion transmembrane transporter activity	Molecular Function	2	Q0QEN2, C4MW55
5	GO:0052689	carboxylic ester hydrolase activity	Molecular Function	1	F1PBK6
5	GO:0003677	DNA binding	Molecular Function	1	F1PP21
5	GO:0022853	active ion transmembrane transporter activity	Molecular Function	1	Q0QEN2
5	GO:0016836	hydro-lyase activity	Molecular Function	1	F1PBK6
5	GO:0004457	lactate dehydrogenase activity	Molecular Function	1	J9NU05
5	GO:0016818	hydrolase activity, acting on acid anhydrides, in phosphorus-containing anhydrides	Molecular Function	2	J9NU17, Q0QEN2
5	GO:0035639	purine ribonucleoside triphosphate binding	Molecular Function	2	J9NU17, Q0QEN2
5	GO:0015399	primary active transmembrane transporter activity	Molecular Function	1	Q0QEN2
5	GO:0008236	serine-type peptidase activity	Molecular Function	1	J9PB81
5	GO:0070011	peptidase activity, acting on L-amino acid peptides	Molecular Function	1	J9PB81
5	GO:0016616	oxidoreductase activity, acting on the CH-OH group of donors, NAD or NADP as acceptor	Molecular Function	1	J9NU05
5	GO:0003723	RNA binding	Molecular Function	1	F1PGC3
5	GO:0001883	purine nucleoside binding	Molecular Function	2	J9NU17, Q0QEN2
5	GO:0016790	thiolester hydrolase activity	Molecular Function	1	E2R7Z9
5	GO:0016832	aldehyde-lyase activity	Molecular Function	1	F1PPB6
5	GO:0032549	ribonucleoside binding	Molecular Function	2	J9NU17, Q0QEN2
5	GO:0046872	metal ion binding	Molecular Function	10	F1PYZ1, J9NYN2, P60529, F1PP21, E2RH23, J9JHF7, F1PBK6, J9JHZ3, P60524, C4MW55
5	GO:0020037	heme binding	Molecular Function	5	F1PYZ1, P60529, J9JHF7, J9JHZ3, P60524
5	GO:0003755	peptidyl-prolyl cis-trans isomerase activity	Molecular Function	1	Q9MZD3
5	GO:0016861	intramolecular oxidoreductase activity, interconverting aldoses and ketoses	Molecular Function	1	E2R2C3
6	GO:0004347	glucose-6-phosphate isomerase activity	Molecular Function	1	E2R2C3
6	GO:0004459	L-lactate dehydrogenase activity	Molecular Function	1	J9NU05
6	GO:0016462	pyrophosphatase activity	Molecular Function	2	J9NU17, Q0QEN2
6	GO:0015035	protein disulfide oxidoreductase activity	Molecular Function	1	J9NWJ5
6	GO:0042626	ATPase activity, coupled to transmembrane movement of substances	Molecular Function	1	Q0QEN2
6	GO:0008324	cation transmembrane transporter activity	Molecular Function	2	Q0QEN2, C4MW55
6	GO:0004252	serine-type endopeptidase activity	Molecular Function	1	J9PB81
6	GO:0032559	adenyl ribonucleotide binding	Molecular Function	2	J9NU17, Q0QEN2
6	GO:0046914	transition metal ion binding	Molecular Function	10	F1PYZ1, J9NYN2, P60529, F1PP21, E2RH23, J9JHF7, F1PBK6, J9JHZ3, P60524, C4MW55
6	GO:0004139	deoxyribose-phosphate aldolase activity	Molecular Function	1	F1PPB6
6	GO:0004089	carbonate dehydratase activity	Molecular Function	1	F1PBK6
6	GO:0005524	ATP binding	Molecular Function	2	J9NU17, Q0QEN2
6	GO:0004064	arylesterase activity	Molecular Function	1	F1PBK6
6	GO:0030554	adenyl nucleotide binding	Molecular Function	2	J9NU17, Q0QEN2
6	GO:0032550	purine ribonucleoside binding	Molecular Function	2	J9NU17, Q0QEN2
6	GO:0004175	endopeptidase activity	Molecular Function	1	J9PB81
6	GO:0015405	P-P-bond-hydrolysis-driven transmembrane transporter activity	Molecular Function	1	Q0QEN2
6	GO:0042625	ATPase coupled ion transmembrane transporter activity	Molecular Function	1	Q0QEN2
6	GO:0016289	CoA hydrolase activity	Molecular Function	1	E2R7Z9
7	GO:0047617	acyl-CoA hydrolase activity	Molecular Function	1	E2R7Z9
7	GO:0019829	cation-transporting ATPase activity	Molecular Function	1	Q0QEN2
7	GO:0005507	copper ion binding	Molecular Function	1	C4MW55
7	GO:0044769	ATPase activity, coupled to transmembrane movement of ions, rotational mechanism	Molecular Function	1	Q0QEN2
7	GO:0005506	iron ion binding	Molecular Function	5	F1PYZ1, P60529, J9JHF7, J9JHZ3, P60524
7	GO:0008270	zinc ion binding	Molecular Function	4	J9NYN2, F1PP21, E2RH23, F1PBK6
7	GO:0017111	nucleoside-triphosphatase activity	Molecular Function	2	J9NU17, Q0QEN2
7	GO:0022890	inorganic cation transmembrane transporter activity	Molecular Function	2	Q0QEN2, C4MW55
8	GO:0003774	motor activity	Molecular Function	1	J9NU17
8	GO:0015077	monovalent inorganic cation transmembrane transporter activity	Molecular Function	2	Q0QEN2, C4MW55
8	GO:0046933	proton-transporting ATP synthase activity, rotational mechanism	Molecular Function	1	Q0QEN2
8	GO:0016887	ATPase activity	Molecular Function	1	Q0QEN2
9	GO:0015078	hydrogen ion transmembrane transporter activity	Molecular Function	2	Q0QEN2, C4MW55
9	GO:0042623	ATPase activity, coupled	Molecular Function	1	Q0QEN2
10	GO:0043492	ATPase activity, coupled to movement of substances	Molecular Function	1	Q0QEN2

## Sheet: cc
Level	GO ID	Term	GO Type	#Seqs	Sequence Names
1	GO:0005575	cellular_component	Cellular Component	41	E2RL75, F1PYZ1, J9NVE9, F6X5M3, F1Q432, J9JHZ3, F1P6H7, C4MW55, F1PBL4, J9NYN2, J9NU17, J9JHF7, F1PPB6, J9PB81, F1PDY8, E2R489, F1PH83, E2R5U8, F1P8G0, E2R2C3, F1PEH9, F1Q0N9, P60529, E2RH23, F1P8A6, F1PBK6, Q9MZD3, E2REU6, E2RKW4, F1PGS2, F1PTY1, J9NWJ5, E2RP87, F1PF31, E2R7Z9, Q0QEN2, J9NU05, J9NWS3, F1P8T3, F1P6P2, P60524
2	GO:0044421	extracellular region part	Cellular Component	10	F1PBK6, F1PF31, E2R7Z9, F1P8G0, F1Q432, E2R5U8, F1PGS2, F1P6H7, F1PTY1, F1PBL4
2	GO:0031974	membrane-enclosed lumen	Cellular Component	1	E2RL75
2	GO:0005576	extracellular region	Cellular Component	12	F1PBK6, F1PF31, E2R7Z9, J9NVE9, F1P8G0, F1Q432, E2R5U8, E2RKW4, F1PGS2, F1P6H7, F1PTY1, F1PBL4
2	GO:0044425	membrane part	Cellular Component	6	J9NU17, Q0QEN2, F6X5M3, F1P8T3, F1PGS2, C4MW55
2	GO:0005623	cell	Cellular Component	30	E2RL75, F1PYZ1, F6X5M3, J9JHZ3, F1PBL4, C4MW55, J9NU17, J9JHF7, F1PPB6, F1PDY8, E2R489, J9PB81, F1PH83, F1P8G0, E2R2C3, F1Q0N9, E2RH23, P60529, F1PBK6, E2REU6, Q9MZD3, F1PGS2, F1PTY1, J9NWJ5, E2R7Z9, Q0QEN2, J9NU05, J9NWS3, F1P8T3, P60524
2	GO:0044422	organelle part	Cellular Component	10	E2RL75, J9NU17, E2REU6, Q0QEN2, E2R489, F1PH83, J9NWS3, F6X5M3, F1PTY1, F1Q0N9
2	GO:0016020	membrane	Cellular Component	8	J9NU17, F1P8A6, Q0QEN2, F6X5M3, F1P8T3, F1PGS2, C4MW55, E2RP87
2	GO:0099080	supramolecular complex	Cellular Component	6	J9NU17, E2REU6, E2R489, J9NWS3, F1PTY1, F1Q0N9
2	GO:0044464	cell part	Cellular Component	30	E2RL75, F1PYZ1, F6X5M3, J9JHZ3, C4MW55, F1PBL4, J9NU17, J9JHF7, F1PPB6, E2R489, J9PB81, F1PH83, F1PDY8, F1P8G0, E2R2C3, F1Q0N9, E2RH23, P60529, F1PBK6, E2REU6, Q9MZD3, F1PGS2, F1PTY1, J9NWJ5, E2R7Z9, Q0QEN2, J9NU05, J9NWS3, F1P8T3, P60524
2	GO:0043226	organelle	Cellular Component	20	E2RL75, E2RH23, F1PBK6, Q9MZD3, E2REU6, F6X5M3, F1PGS2, F1PTY1, J9NWJ5, J9NYN2, J9NU17, E2R7Z9, E2R489, Q0QEN2, J9PB81, F1PH83, J9NWS3, F1P6P2, F1PEH9, F1Q0N9
2	GO:0032991	macromolecular complex	Cellular Component	14	E2RL75, F1PYZ1, P60529, F6X5M3, J9JHZ3, F1PGS2, C4MW55, F1PBL4, J9NU17, J9JHF7, Q0QEN2, F1PH83, F1P8G0, P60524
3	GO:0072562	blood microparticle	Cellular Component	1	F1PGS2
3	GO:0098589	membrane region	Cellular Component	1	F6X5M3
3	GO:0071944	cell periphery	Cellular Component	5	J9NU17, F6X5M3, F1P8T3, F1PGS2, F1Q0N9
3	GO:1903561	extracellular vesicle	Cellular Component	3	F1PBK6, E2R7Z9, F1PGS2
3	GO:0043230	extracellular organelle	Cellular Component	3	F1PBK6, E2R7Z9, F1PGS2
3	GO:0009986	cell surface	Cellular Component	1	F1PGS2
3	GO:0005886	plasma membrane	Cellular Component	4	J9NU17, F6X5M3, F1P8T3, F1PGS2
3	GO:0099081	supramolecular polymer	Cellular Component	6	J9NU17, E2REU6, E2R489, J9NWS3, F1PTY1, F1Q0N9
3	GO:0044424	intracellular part	Cellular Component	25	E2RL75, F1PYZ1, F6X5M3, J9JHZ3, C4MW55, J9NU17, J9JHF7, F1PPB6, E2R489, J9PB81, F1PH83, F1Q0N9, E2RH23, P60529, F1PBK6, E2REU6, Q9MZD3, F1PGS2, F1PTY1, J9NWJ5, E2R7Z9, Q0QEN2, J9NU05, J9NWS3, P60524
3	GO:0098590	plasma membrane region	Cellular Component	1	J9NU17
3	GO:0005622	intracellular	Cellular Component	25	E2RL75, F1PYZ1, F6X5M3, J9JHZ3, C4MW55, J9NU17, J9JHF7, F1PPB6, E2R489, J9PB81, F1PH83, F1Q0N9, E2RH23, P60529, F1PBK6, E2REU6, Q9MZD3, F1PGS2, F1PTY1, J9NWJ5, E2R7Z9, Q0QEN2, J9NU05, J9NWS3, P60524
3	GO:0043227	membrane-bounded organelle	Cellular Component	13	E2RL75, E2RH23, F1PBK6, Q9MZD3, F6X5M3, F1PGS2, J9NWJ5, J9NYN2, E2R7Z9, Q0QEN2, J9PB81, F1PH83, F1P6P2
3	GO:0005615	extracellular space	Cellular Component	3	F1P8G0, F1PGS2, F1PBL4
3	GO:0043233	organelle lumen	Cellular Component	1	E2RL75
3	GO:0031012	extracellular matrix	Cellular Component	3	F1PF31, F1Q432, F1P6H7
3	GO:0048475	coated membrane	Cellular Component	1	F6X5M3
3	GO:0070469	respiratory chain	Cellular Component	1	C4MW55
3	GO:0098796	membrane protein complex	Cellular Component	3	Q0QEN2, F6X5M3, C4MW55
3	GO:0031224	intrinsic component of membrane	Cellular Component	1	C4MW55
3	GO:0043229	intracellular organelle	Cellular Component	13	E2RL75, E2RH23, E2REU6, F6X5M3, F1PGS2, F1PTY1, J9NU17, Q0QEN2, E2R489, J9PB81, F1PH83, J9NWS3, F1Q0N9
3	GO:0043228	non-membrane-bounded organelle	Cellular Component	6	J9NU17, E2REU6, E2R489, J9NWS3, F1PTY1, F1Q0N9
3	GO:0098862	cluster of actin-based cell projections	Cellular Component	1	J9NU17
3	GO:0098552	side of membrane	Cellular Component	1	F1PGS2
3	GO:0043234	protein complex	Cellular Component	14	E2RL75, F1PYZ1, P60529, F6X5M3, J9JHZ3, F1PGS2, C4MW55, F1PBL4, J9NU17, J9JHF7, Q0QEN2, F1PH83, F1P8G0, P60524
3	GO:0012505	endomembrane system	Cellular Component	3	F1PH83, F6X5M3, F1PGS2
3	GO:0044446	intracellular organelle part	Cellular Component	10	E2RL75, J9NU17, E2REU6, Q0QEN2, E2R489, F1PH83, J9NWS3, F6X5M3, F1PTY1, F1Q0N9
3	GO:0005905	clathrin-coated pit	Cellular Component	1	F6X5M3
3	GO:0044459	plasma membrane part	Cellular Component	3	J9NU17, F6X5M3, F1PGS2
3	GO:0070062	extracellular exosome	Cellular Component	3	F1PBK6, E2R7Z9, F1PGS2
3	GO:0005577	fibrinogen complex	Cellular Component	3	F1P8G0, F1PGS2, F1PBL4
3	GO:0042995	cell projection	Cellular Component	1	J9NU17
3	GO:0031090	organelle membrane	Cellular Component	1	F6X5M3
3	GO:0098805	whole membrane	Cellular Component	1	F6X5M3
4	GO:0098803	respiratory chain complex	Cellular Component	1	C4MW55
4	GO:0032039	integrator complex	Cellular Component	1	E2RL75
4	GO:0030658	transport vesicle membrane	Cellular Component	1	F6X5M3
4	GO:0016459	myosin complex	Cellular Component	1	J9NU17
4	GO:0005833	hemoglobin complex	Cellular Component	5	F1PYZ1, P60529, J9JHF7, J9JHZ3, P60524
4	GO:0030880	RNA polymerase complex	Cellular Component	1	E2RL75
4	GO:0045259	proton-transporting ATP synthase complex	Cellular Component	1	Q0QEN2
4	GO:0099512	supramolecular fiber	Cellular Component	6	J9NU17, E2REU6, E2R489, J9NWS3, F1PTY1, F1Q0N9
4	GO:0099023	tethring complex	Cellular Component	1	F1PH83
4	GO:0070013	intracellular organelle lumen	Cellular Component	1	E2RL75
4	GO:0030117	membrane coat	Cellular Component	1	F6X5M3
4	GO:0098858	actin-based cell projection	Cellular Component	1	J9NU17
4	GO:0005737	cytoplasm	Cellular Component	18	F1PYZ1, P60529, F1PBK6, Q9MZD3, E2REU6, F6X5M3, J9JHZ3, F1PGS2, J9NWJ5, J9NU17, J9JHF7, E2R7Z9, F1PPB6, Q0QEN2, F1PH83, J9NU05, J9PB81, P60524
4	GO:0097708	intracellular vesicle	Cellular Component	2	F6X5M3, F1PGS2
4	GO:0045277	respiratory chain complex IV	Cellular Component	1	C4MW55
4	GO:0030132	clathrin coat of coated pit	Cellular Component	1	F6X5M3
4	GO:0044429	mitochondrial part	Cellular Component	1	Q0QEN2
4	GO:0044444	cytoplasmic part	Cellular Component	11	F1PYZ1, P60529, J9NU17, J9JHF7, E2R7Z9, Q0QEN2, F1PH83, F6X5M3, J9JHZ3, F1PGS2, P60524
4	GO:0070069	cytochrome complex	Cellular Component	1	C4MW55
4	GO:0033178	proton-transporting two-sector ATPase complex, catalytic domain	Cellular Component	1	Q0QEN2
4	GO:0005903	brush border	Cellular Component	1	J9NU17
4	GO:0044428	nuclear part	Cellular Component	1	E2RL75
4	GO:0098797	plasma membrane protein complex	Cellular Component	1	F6X5M3
4	GO:0016469	proton-transporting two-sector ATPase complex	Cellular Component	1	Q0QEN2
4	GO:0030662	coated vesicle membrane	Cellular Component	1	F6X5M3
4	GO:0005578	proteinaceous extracellular matrix	Cellular Component	1	F1Q432
4	GO:0098588	bounding membrane of organelle	Cellular Component	1	F6X5M3
4	GO:0044430	cytoskeletal part	Cellular Component	6	J9NU17, E2REU6, E2R489, J9NWS3, F1PTY1, F1Q0N9
4	GO:0044433	cytoplasmic vesicle part	Cellular Component	1	F6X5M3
4	GO:0044431	Golgi apparatus part	Cellular Component	2	F1PH83, F6X5M3
4	GO:0030141	secretory granule	Cellular Component	1	F1PGS2
4	GO:0016021	integral component of membrane	Cellular Component	1	C4MW55
4	GO:0012506	vesicle membrane	Cellular Component	1	F6X5M3
4	GO:0016323	basolateral plasma membrane	Cellular Component	1	J9NU17
4	GO:0030133	transport vesicle	Cellular Component	1	F6X5M3
4	GO:0005938	cell cortex	Cellular Component	1	J9NU17
4	GO:0005794	Golgi apparatus	Cellular Component	2	F1PH83, F6X5M3
4	GO:0030660	Golgi-associated vesicle membrane	Cellular Component	1	F6X5M3
4	GO:0043232	intracellular non-membrane-bounded organelle	Cellular Component	6	J9NU17, E2REU6, E2R489, J9NWS3, F1PTY1, F1Q0N9
4	GO:0031941	filamentous actin	Cellular Component	1	J9NU17
4	GO:0016328	lateral plasma membrane	Cellular Component	1	J9NU17
4	GO:0009897	external side of plasma membrane	Cellular Component	1	F1PGS2
4	GO:0031982	vesicle	Cellular Component	5	F1PBK6, E2R7Z9, F6X5M3, F1P6P2, F1PGS2
4	GO:0043231	intracellular membrane-bounded organelle	Cellular Component	7	E2RL75, E2RH23, Q0QEN2, F1PH83, J9PB81, F6X5M3, F1PGS2
4	GO:1902494	catalytic complex	Cellular Component	1	E2RL75
5	GO:1990234	transferase complex	Cellular Component	1	E2RL75
5	GO:0030140	trans-Golgi network transport vesicle	Cellular Component	1	F6X5M3
5	GO:0030118	clathrin coat	Cellular Component	1	F6X5M3
5	GO:0005654	nucleoplasm	Cellular Component	1	E2RL75
5	GO:0044445	cytosolic part	Cellular Component	5	F1PYZ1, P60529, J9JHF7, J9JHZ3, P60524
5	GO:0031410	cytoplasmic vesicle	Cellular Component	2	F6X5M3, F1PGS2
5	GO:0044451	nucleoplasm part	Cellular Component	1	E2RL75
5	GO:0005739	mitochondrion	Cellular Component	1	Q0QEN2
5	GO:0030864	cortical actin cytoskeleton	Cellular Component	1	J9NU17
5	GO:0030130	clathrin coat of trans-Golgi network vesicle	Cellular Component	1	F6X5M3
5	GO:0030659	cytoplasmic vesicle membrane	Cellular Component	1	F6X5M3
5	GO:0012510	trans-Golgi network transport vesicle membrane	Cellular Component	1	F6X5M3
5	GO:0099568	cytoplasmic region	Cellular Component	1	J9NU17
5	GO:0031091	platelet alpha granule	Cellular Component	1	F1PGS2
5	GO:0030665	clathrin-coated vesicle membrane	Cellular Component	1	F6X5M3
5	GO:0005634	nucleus	Cellular Component	2	E2RL75, E2RH23
5	GO:0055029	nuclear DNA-directed RNA polymerase complex	Cellular Component	1	E2RL75
5	GO:0044448	cell cortex part	Cellular Component	1	J9NU17
5	GO:0005902	microvillus	Cellular Component	1	J9NU17
5	GO:0000428	DNA-directed RNA polymerase complex	Cellular Component	1	E2RL75
5	GO:0031981	nuclear lumen	Cellular Component	1	E2RL75
5	GO:0016023	cytoplasmic, membrane-bounded vesicle	Cellular Component	2	F6X5M3, F1PGS2
5	GO:0031988	membrane-bounded vesicle	Cellular Component	4	F1PBK6, E2R7Z9, F6X5M3, F1PGS2
5	GO:0099513	polymeric cytoskeletal fiber	Cellular Component	6	J9NU17, E2REU6, E2R489, J9NWS3, F1PTY1, F1Q0N9
5	GO:0030120	vesicle coat	Cellular Component	1	F6X5M3
5	GO:0005829	cytosol	Cellular Component	6	F1PYZ1, P60529, J9JHF7, E2R7Z9, J9JHZ3, P60524
5	GO:0005856	cytoskeleton	Cellular Component	6	J9NU17, E2REU6, E2R489, J9NWS3, F1PTY1, F1Q0N9
5	GO:0005798	Golgi-associated vesicle	Cellular Component	1	F6X5M3
5	GO:0017119	Golgi transport complex	Cellular Component	1	F1PH83
6	GO:0016591	DNA-directed RNA polymerase II, holoenzyme	Cellular Component	1	E2RL75
6	GO:0045111	intermediate filament cytoskeleton	Cellular Component	5	E2REU6, E2R489, J9NWS3, F1PTY1, F1Q0N9
6	GO:0030125	clathrin vesicle coat	Cellular Component	1	F6X5M3
6	GO:0030135	coated vesicle	Cellular Component	1	F6X5M3
6	GO:0030863	cortical cytoskeleton	Cellular Component	1	J9NU17
6	GO:0005884	actin filament	Cellular Component	1	J9NU17
6	GO:0099503	secretory vesicle	Cellular Component	1	F1PGS2
6	GO:0005882	intermediate filament	Cellular Component	5	E2REU6, E2R489, J9NWS3, F1PTY1, F1Q0N9
6	GO:0061695	transferase complex, transferring phosphorus-containing groups	Cellular Component	1	E2RL75
6	GO:0015629	actin cytoskeleton	Cellular Component	1	J9NU17
7	GO:0045095	keratin filament	Cellular Component	2	E2R489, F1PTY1
7	GO:0030136	clathrin-coated vesicle	Cellular Component	1	F6X5M3

## Sheet: enrich
GO-ID	Term	Category	#Diff	#Ref	%Diff	%Ref	Over/Under	P-Value	FDR	DiffSeqs
GO:0015671	oxygen transport	P	5	8	9.80392	1.15774	OVER	7.01741e-05	0.0564902	P60529, J9JHF7, P60524, F1PYZ1, J9JHZ3
GO:0015669	gas transport	P	5	8	9.80392	1.15774	OVER	7.01741e-05	0.0564902	P60529, J9JHF7, P60524, F1PYZ1, J9JHZ3
GO:0005833	hemoglobin complex	C	5	8	9.80392	1.15774	OVER	7.01741e-05	0.0564902	P60529, J9JHF7, P60524, F1PYZ1, J9JHZ3
GO:0019825	oxygen binding	F	5	8	9.80392	1.15774	OVER	7.01741e-05	0.0564902	P60529, J9JHF7, P60524, F1PYZ1, J9JHZ3
GO:0043234	protein complex	C	19	118	37.2549	17.0767	OVER	0.000204267	0.131548	C4MW55, P60529, J9NU17, J9JHF7, P60524, F1PTY1, E2RL75, E2REU6, F1Q0N9, F1PYZ1, F1P8G0, F1PH83, F1PBL4, F6X5M3, E2R489, F1PGS2, J9JHZ3, J9NWS3, Q0QEN2
GO:0060090	binding, bridging	F	3	3	5.88235	0.434153	OVER	0.000337432	0.155219	F1P8G0, F1PBL4, F1PGS2
GO:0030674	protein binding, bridging	F	3	3	5.88235	0.434153	OVER	0.000337432	0.155219	F1P8G0, F1PBL4, F1PGS2
GO:0045111	intermediate filament cytoskeleton	C	5	11	9.80392	1.5919	OVER	0.00049118	0.15816	F1PTY1, E2REU6, F1Q0N9, E2R489, J9NWS3
GO:0020037	heme binding	F	5	11	9.80392	1.5919	OVER	0.00049118	0.15816	P60529, J9JHF7, P60524, F1PYZ1, J9JHZ3
GO:0005882	intermediate filament	C	5	11	9.80392	1.5919	OVER	0.00049118	0.15816	F1PTY1, E2REU6, F1Q0N9, E2R489, J9NWS3
GO:0005198	structural molecule activity	F	7	23	13.7255	3.32851	OVER	0.000600866	0.17589	F1PTY1, E2REU6, F1Q0N9, F6X5M3, E2R489, F1PGS2, J9NWS3
GO:0046906	tetrapyrrole binding	F	5	12	9.80392	1.73661	OVER	0.000797168	0.197452	P60529, J9JHF7, P60524, F1PYZ1, J9JHZ3
GO:0005506	iron ion binding	F	5	12	9.80392	1.73661	OVER	0.000797168	0.197452	P60529, J9JHF7, P60524, F1PYZ1, J9JHZ3
GO:0046914	transition metal ion binding	F	10	48	19.6078	6.94645	OVER	0.00106444	0.231075	C4MW55, P60529, J9JHF7, P60524, J9NYN2, F1PYZ1, E2RH23, F1PP21, J9JHZ3, F1PBK6
GO:0044445	cytosolic part	C	5	13	9.80392	1.88133	OVER	0.00122643	0.231075	P60529, J9JHF7, P60524, F1PYZ1, J9JHZ3
GO:0070374	positive regulation of ERK1 and ERK2 cascade	P	3	4	5.88235	0.578871	OVER	0.00128204	0.231075	F1P8T3, J9NVE9, F1PGS2
GO:0070372	regulation of ERK1 and ERK2 cascade	P	3	4	5.88235	0.578871	OVER	0.00128204	0.231075	F1P8T3, J9NVE9, F1PGS2
GO:0032991	macromolecular complex	C	19	137	37.2549	19.8263	OVER	0.00129173	0.231075	C4MW55, P60529, J9NU17, J9JHF7, P60524, F1PTY1, E2RL75, E2REU6, F1Q0N9, F1PYZ1, F1P8G0, F1PH83, F1PBL4, F6X5M3, E2R489, F1PGS2, J9JHZ3, J9NWS3, Q0QEN2
GO:0070371	ERK1 and ERK2 cascade	P	3	5	5.88235	0.723589	OVER	0.00304475	0.490205	F1P8T3, J9NVE9, F1PGS2
GO:0005577	fibrinogen complex	C	3	5	5.88235	0.723589	OVER	0.00304475	0.490205	F1P8G0, F1PBL4, F1PGS2
GO:0005737	cytoplasm	C	18	137	35.2941	19.8263	OVER	0.00440065	0.674767	J9PB81, F1PPB6, P60529, J9NU17, J9JHF7, P60524, E2R7Z9, E2REU6, F1PYZ1, F1PH83, J9NU05, F6X5M3, Q9MZD3, F1PGS2, J9JHZ3, J9NWJ5, F1PBK6, Q0QEN2
GO:0009914	hormone transport	P	2	2	3.92157	0.289436	OVER	0.00494412	0.723639	E2R5U8, F1PGS2
GO:0043410	positive regulation of MAPK cascade	P	3	6	5.88235	0.868307	OVER	0.00578558	0.745182	F1P8T3, J9NVE9, F1PGS2
GO:0043408	regulation of MAPK cascade	P	3	6	5.88235	0.868307	OVER	0.00578558	0.745182	F1P8T3, J9NVE9, F1PGS2
GO:0030168	platelet activation	P	3	6	5.88235	0.868307	OVER	0.00578558	0.745182	F1P8G0, F1PBL4, F1PGS2
GO:0005829	cytosol	C	6	27	11.7647	3.90738	OVER	0.00878743	1	P60529, J9JHF7, P60524, E2R7Z9, F1PYZ1, J9JHZ3
GO:0051258	protein polymerization	P	3	7	5.88235	1.01302	OVER	0.00962068	1	F1P8G0, F1PBL4, F1PGS2
GO:0043623	cellular protein complex assembly	P	3	7	5.88235	1.01302	OVER	0.00962068	1	F1P8G0, F1PBL4, F1PGS2
GO:0034622	cellular macromolecular complex assembly	P	3	7	5.88235	1.01302	OVER	0.00962068	1	F1P8G0, F1PBL4, F1PGS2
GO:0051704	multi-organism process	P	5	20	9.80392	2.89436	OVER	0.0100829	1	J9PB81, Q9MZD3, F1PGS2, E2R357, F1PGC3
GO:0010817	regulation of hormone levels	P	2	3	3.92157	0.434153	OVER	0.0141575	1	E2R5U8, F1PGS2
GO:0006818	hydrogen transport	P	2	3	3.92157	0.434153	OVER	0.0141575	1	C4MW55, Q0QEN2
GO:0015992	proton transport	P	2	3	3.92157	0.434153	OVER	0.0141575	1	C4MW55, Q0QEN2
GO:1902533	positive regulation of intracellular signal transduction	P	3	8	5.88235	1.15774	OVER	0.0146287	1	F1P8T3, J9NVE9, F1PGS2
GO:0001934	positive regulation of protein phosphorylation	P	3	8	5.88235	1.15774	OVER	0.0146287	1	F1P8T3, J9NVE9, F1PGS2
GO:0023014	signal transduction by protein phosphorylation	P	3	8	5.88235	1.15774	OVER	0.0146287	1	F1P8T3, J9NVE9, F1PGS2
GO:0000165	MAPK cascade	P	3	8	5.88235	1.15774	OVER	0.0146287	1	F1P8T3, J9NVE9, F1PGS2
GO:0065007	biological regulation	P	13	297	25.4902	42.9812	UNDER	0.0156203	1	F1PDY8, E2R5U8, F1P8T3, F1P6H7, F1PTY1, F1PF31, F1P8G0, F1PP21, J9NVE9, F1PBL4, Q9MZD3, F1PGS2, J9NWJ5
GO:0006793	phosphorus metabolic process	P	9	58	17.6471	8.39363	OVER	0.0156839	1	C4MW55, F1P8T3, F1PPB6, E2R7Z9, E2R2C3, J9NVE9, J9NU05, F1PGS2, Q0QEN2
GO:0044464	cell part	C	30	308	58.8235	44.5731	OVER	0.0161618	1	J9PB81, C4MW55, F1PDY8, F1P8T3, F1PPB6, P60529, J9NU17, J9JHF7, P60524, E2R7Z9, F1PTY1, E2RL75, E2REU6, F1Q0N9, F1PYZ1, E2RH23, E2R2C3, F1P8G0, F1PH83, F1PBL4, J9NU05, F6X5M3, E2R489, Q9MZD3, F1PGS2, J9JHZ3, J9NWJ5, F1PBK6, J9NWS3, Q0QEN2
GO:0044424	intracellular part	C	25	242	49.0196	35.0217	OVER	0.018667	1	J9PB81, C4MW55, F1PPB6, P60529, J9NU17, J9JHF7, P60524, E2R7Z9, F1PTY1, E2RL75, E2REU6, F1Q0N9, F1PYZ1, E2RH23, F1PH83, J9NU05, F6X5M3, E2R489, Q9MZD3, F1PGS2, J9JHZ3, J9NWJ5, F1PBK6, J9NWS3, Q0QEN2
GO:0042327	positive regulation of phosphorylation	P	3	9	5.88235	1.30246	OVER	0.0208562	1	F1P8T3, J9NVE9, F1PGS2
GO:0050789	regulation of biological process	P	11	261	21.5686	37.7713	UNDER	0.0210583	1	F1PDY8, F1P8T3, F1P6H7, F1PF31, F1P8G0, F1PP21, J9NVE9, F1PBL4, Q9MZD3, F1PGS2, J9NWJ5
GO:0019693	ribose phosphate metabolic process	P	5	24	9.80392	3.47323	OVER	0.0222405	1	C4MW55, F1PPB6, E2R2C3, J9NU05, Q0QEN2
GO:0005623	cell	C	30	310	58.8235	44.8625	OVER	0.0233103	1	J9PB81, C4MW55, F1PDY8, F1P8T3, F1PPB6, P60529, J9NU17, J9JHF7, P60524, E2R7Z9, F1PTY1, E2RL75, E2REU6, F1Q0N9, F1PYZ1, E2RH23, E2R2C3, F1P8G0, F1PH83, F1PBL4, J9NU05, F6X5M3, E2R489, Q9MZD3, F1PGS2, J9JHZ3, J9NWJ5, F1PBK6, J9NWS3, Q0QEN2
GO:0009117	nucleotide metabolic process	P	5	25	9.80392	3.61795	OVER	0.026333	1	C4MW55, F1PPB6, E2R2C3, J9NU05, Q0QEN2
GO:0006753	nucleoside phosphate metabolic process	P	5	25	9.80392	3.61795	OVER	0.026333	1	C4MW55, F1PPB6, E2R2C3, J9NU05, Q0QEN2
GO:0015078	hydrogen ion transmembrane transporter activity	F	2	4	3.92157	0.578871	OVER	0.0270329	1	C4MW55, Q0QEN2
GO:0018193	peptidyl-amino acid modification	P	2	4	3.92157	0.578871	OVER	0.0270329	1	J9NVE9, Q9MZD3
GO:0001932	regulation of protein phosphorylation	P	3	10	5.88235	1.44718	OVER	0.0283228	1	F1P8T3, J9NVE9, F1PGS2
GO:0010562	positive regulation of phosphorus metabolic process	P	3	10	5.88235	1.44718	OVER	0.0283228	1	F1P8T3, J9NVE9, F1PGS2
GO:0045937	positive regulation of phosphate metabolic process	P	3	10	5.88235	1.44718	OVER	0.0283228	1	F1P8T3, J9NVE9, F1PGS2
GO:0005622	intracellular	C	25	250	49.0196	36.1795	OVER	0.0296271	1	J9PB81, C4MW55, F1PPB6, P60529, J9NU17, J9JHF7, P60524, E2R7Z9, F1PTY1, E2RL75, E2REU6, F1Q0N9, F1PYZ1, E2RH23, F1PH83, J9NU05, F6X5M3, E2R489, Q9MZD3, F1PGS2, J9JHZ3, J9NWJ5, F1PBK6, J9NWS3, Q0QEN2
GO:0055086	nucleobase-containing small molecule metabolic process	P	5	26	9.80392	3.76266	OVER	0.0308832	1	C4MW55, F1PPB6, E2R2C3, J9NU05, Q0QEN2
GO:0009199	ribonucleoside triphosphate metabolic process	P	4	18	7.84314	2.60492	OVER	0.0327104	1	C4MW55, E2R2C3, J9NU05, Q0QEN2
GO:0009167	purine ribonucleoside monophosphate metabolic process	P	4	18	7.84314	2.60492	OVER	0.0327104	1	C4MW55, E2R2C3, J9NU05, Q0QEN2
GO:0009161	ribonucleoside monophosphate metabolic process	P	4	18	7.84314	2.60492	OVER	0.0327104	1	C4MW55, E2R2C3, J9NU05, Q0QEN2
GO:0009144	purine nucleoside triphosphate metabolic process	P	4	18	7.84314	2.60492	OVER	0.0327104	1	C4MW55, E2R2C3, J9NU05, Q0QEN2
GO:0009141	nucleoside triphosphate metabolic process	P	4	18	7.84314	2.60492	OVER	0.0327104	1	C4MW55, E2R2C3, J9NU05, Q0QEN2
GO:0009126	purine nucleoside monophosphate metabolic process	P	4	18	7.84314	2.60492	OVER	0.0327104	1	C4MW55, E2R2C3, J9NU05, Q0QEN2
GO:0009123	nucleoside monophosphate metabolic process	P	4	18	7.84314	2.60492	OVER	0.0327104	1	C4MW55, E2R2C3, J9NU05, Q0QEN2
GO:0009119	ribonucleoside metabolic process	P	4	18	7.84314	2.60492	OVER	0.0327104	1	C4MW55, E2R2C3, J9NU05, Q0QEN2
GO:0009116	nucleoside metabolic process	P	4	18	7.84314	2.60492	OVER	0.0327104	1	C4MW55, E2R2C3, J9NU05, Q0QEN2
GO:1901657	glycosyl compound metabolic process	P	4	18	7.84314	2.60492	OVER	0.0327104	1	C4MW55, E2R2C3, J9NU05, Q0QEN2
GO:0046128	purine ribonucleoside metabolic process	P	4	18	7.84314	2.60492	OVER	0.0327104	1	C4MW55, E2R2C3, J9NU05, Q0QEN2
GO:0071822	protein complex subunit organization	P	4	18	7.84314	2.60492	OVER	0.0327104	1	F1P8G0, F1PBL4, F1PGS2, F1Q432
GO:0046034	ATP metabolic process	P	4	18	7.84314	2.60492	OVER	0.0327104	1	C4MW55, E2R2C3, J9NU05, Q0QEN2
GO:0042278	purine nucleoside metabolic process	P	4	18	7.84314	2.60492	OVER	0.0327104	1	C4MW55, E2R2C3, J9NU05, Q0QEN2
GO:0009205	purine ribonucleoside triphosphate metabolic process	P	4	18	7.84314	2.60492	OVER	0.0327104	1	C4MW55, E2R2C3, J9NU05, Q0QEN2
GO:0044430	cytoskeletal part	C	6	36	11.7647	5.20984	OVER	0.0352338	1	J9NU17, F1PTY1, E2REU6, F1Q0N9, E2R489, J9NWS3
GO:0051707	response to other organism	P	3	11	5.88235	1.5919	OVER	0.0370254	1	J9PB81, F1PGS2, F1PGC3
GO:0009607	response to biotic stimulus	P	3	11	5.88235	1.5919	OVER	0.0370254	1	J9PB81, F1PGS2, F1PGC3
GO:0042325	regulation of phosphorylation	P	3	11	5.88235	1.5919	OVER	0.0370254	1	F1P8T3, J9NVE9, F1PGS2
GO:0010647	positive regulation of cell communication	P	3	11	5.88235	1.5919	OVER	0.0370254	1	F1P8T3, J9NVE9, F1PGS2
GO:0023056	positive regulation of signaling	P	3	11	5.88235	1.5919	OVER	0.0370254	1	F1P8T3, J9NVE9, F1PGS2
GO:0043207	response to external biotic stimulus	P	3	11	5.88235	1.5919	OVER	0.0370254	1	J9PB81, F1PGS2, F1PGC3
GO:0009967	positive regulation of signal transduction	P	3	11	5.88235	1.5919	OVER	0.0370254	1	F1P8T3, J9NVE9, F1PGS2
GO:0001775	cell activation	P	3	11	5.88235	1.5919	OVER	0.0370254	1	F1P8G0, F1PBL4, F1PGS2
GO:0050896	response to stimulus	P	9	221	17.6471	31.9826	UNDER	0.0372917	1	J9PB81, F1PDY8, F1P8T3, E2R7Z9, F1P8G0, J9NVE9, F1PBL4, F1PGS2, F1PGC3
GO:0009150	purine ribonucleotide metabolic process	P	4	19	7.84314	2.74964	OVER	0.0393037	1	C4MW55, E2R2C3, J9NU05, Q0QEN2
GO:0006163	purine nucleotide metabolic process	P	4	19	7.84314	2.74964	OVER	0.0393037	1	C4MW55, E2R2C3, J9NU05, Q0QEN2
GO:0009259	ribonucleotide metabolic process	P	4	19	7.84314	2.74964	OVER	0.0393037	1	C4MW55, E2R2C3, J9NU05, Q0QEN2
GO:0016310	phosphorylation	P	6	37	11.7647	5.35456	OVER	0.0398064	1	C4MW55, F1P8T3, E2R2C3, J9NVE9, J9NU05, F1PGS2
GO:0002682	regulation of immune system process	P	0	48	0	6.94645	UNDER	0.0405411	1
GO:0098589	membrane region	C	2	5	3.92157	0.723589	OVER	0.043025	1	J9NU17, F6X5M3
GO:0015077	monovalent inorganic cation transmembrane transporter activity	F	2	5	3.92157	0.723589	OVER	0.043025	1	C4MW55, Q0QEN2
GO:0015672	monovalent inorganic cation transport	P	2	5	3.92157	0.723589	OVER	0.043025	1	C4MW55, Q0QEN2
GO:0044431	Golgi apparatus part	C	2	5	3.92157	0.723589	OVER	0.043025	1	F1PH83, F6X5M3
GO:0031401	positive regulation of protein modification process	P	3	12	5.88235	1.73661	OVER	0.0469422	1	F1P8T3, J9NVE9, F1PGS2
GO:1902531	regulation of intracellular signal transduction	P	3	12	5.88235	1.73661	OVER	0.0469422	1	F1P8T3, J9NVE9, F1PGS2
GO:0006796	phosphate-containing compound metabolic process	P	8	57	15.6863	8.24891	OVER	0.0523276	1	C4MW55, F1P8T3, F1PPB6, E2R2C3, J9NVE9, J9NU05, F1PGS2, Q0QEN2
GO:0006732	coenzyme metabolic process	P	4	21	7.84314	3.03907	OVER	0.0546268	1	F1PPB6, E2R7Z9, E2R2C3, J9NU05
GO:0005576	extracellular region	C	10	230	19.6078	33.2851	UNDER	0.0568706	1	E2R5U8, E2R7Z9, F1PTY1, F1P8G0, J9NVE9, F1PBL4, F1PGS2, F1Q432, F1PBK6, E2RKW4
GO:0045184	establishment of protein localization	P	3	13	5.88235	1.88133	OVER	0.0580359	1	F1PH83, F6X5M3, F1PGS2
GO:0015031	protein transport	P	3	13	5.88235	1.88133	OVER	0.0580359	1	F1PH83, F6X5M3, F1PGS2
GO:0019220	regulation of phosphate metabolic process	P	3	13	5.88235	1.88133	OVER	0.0580359	1	F1P8T3, J9NVE9, F1PGS2
GO:0045095	keratin filament	C	2	6	3.92157	0.868307	OVER	0.0616448	1	F1PTY1, E2R489
GO:0006886	intracellular protein transport	P	2	6	3.92157	0.868307	OVER	0.0616448	1	F1PH83, F6X5M3
GO:0071705	nitrogen compound transport	P	2	6	3.92157	0.868307	OVER	0.0616448	1	E2R5U8, F1PGS2
GO:0090066	regulation of anatomical structure size	P	2	6	3.92157	0.868307	OVER	0.0616448	1	F1P8T3, F1PGS2
GO:0072521	purine-containing compound metabolic process	P	4	22	7.84314	3.18379	OVER	0.0633526	1	C4MW55, E2R2C3, J9NU05, Q0QEN2
GO:0002684	positive regulation of immune system process	P	0	43	0	6.22287	UNDER	0.0639092	1
GO:0005509	calcium ion binding	F	0	45	0	6.5123	UNDER	0.0651653	1
GO:0019538	protein metabolic process	P	5	141	9.80392	20.4052	UNDER	0.0668611	1	J9PB81, F1P8T3, J9NVE9, Q9MZD3, F1PGS2
GO:0019637	organophosphate metabolic process	P	5	32	9.80392	4.63097	OVER	0.0683851	1	C4MW55, F1PPB6, E2R2C3, J9NU05, Q0QEN2
GO:0006461	protein complex assembly	P	3	14	5.88235	2.02605	OVER	0.0702567	1	F1P8G0, F1PBL4, F1PGS2
GO:0051174	regulation of phosphorus metabolic process	P	3	14	5.88235	2.02605	OVER	0.0702567	1	F1P8T3, J9NVE9, F1PGS2
GO:0070271	protein complex biogenesis	P	3	14	5.88235	2.02605	OVER	0.0702567	1	F1P8G0, F1PBL4, F1PGS2
GO:0031399	regulation of protein modification process	P	3	14	5.88235	2.02605	OVER	0.0702567	1	F1P8T3, J9NVE9, F1PGS2
GO:0004347	glucose-6-phosphate isomerase activity	F	1	1	1.96078	0.144718	OVER	0.0710059	1	E2R2C3
GO:0046949	fatty-acyl-CoA biosynthetic process	P	1	1	1.96078	0.144718	OVER	0.0710059	1	E2R7Z9
GO:0003206	cardiac chamber morphogenesis	P	1	1	1.96078	0.144718	OVER	0.0710059	1	F1PP21
GO:0003205	cardiac chamber development	P	1	1	1.96078	0.144718	OVER	0.0710059	1	F1PP21
GO:0042562	hormone binding	F	1	1	1.96078	0.144718	OVER	0.0710059	1	E2R5U8
GO:0015833	peptide transport	P	1	1	1.96078	0.144718	OVER	0.0710059	1	F1PGS2
GO:0070327	thyroid hormone transport	P	1	1	1.96078	0.144718	OVER	0.0710059	1	E2R5U8
GO:0002793	positive regulation of peptide secretion	P	1	1	1.96078	0.144718	OVER	0.0710059	1	F1PGS2
GO:0070324	thyroid hormone binding	F	1	1	1.96078	0.144718	OVER	0.0710059	1	E2R5U8
GO:0002791	regulation of peptide secretion	P	1	1	1.96078	0.144718	OVER	0.0710059	1	F1PGS2
GO:0002790	peptide secretion	P	1	1	1.96078	0.144718	OVER	0.0710059	1	F1PGS2
GO:0009166	nucleotide catabolic process	P	1	1	1.96078	0.144718	OVER	0.0710059	1	F1PPB6
GO:0012510	trans-Golgi network transport vesicle membrane	C	1	1	1.96078	0.144718	OVER	0.0710059	1	F6X5M3
GO:0048475	coated membrane	C	1	1	1.96078	0.144718	OVER	0.0710059	1	F6X5M3
GO:0016289	CoA hydrolase activity	F	1	1	1.96078	0.144718	OVER	0.0710059	1	E2R7Z9
GO:0050714	positive regulation of protein secretion	P	1	1	1.96078	0.144718	OVER	0.0710059	1	F1PGS2
GO:0044057	regulation of system process	P	1	1	1.96078	0.144718	OVER	0.0710059	1	F1PGS2
GO:0035338	long-chain fatty-acyl-CoA biosynthetic process	P	1	1	1.96078	0.144718	OVER	0.0710059	1	E2R7Z9
GO:0035337	fatty-acyl-CoA metabolic process	P	1	1	1.96078	0.144718	OVER	0.0710059	1	E2R7Z9
GO:0035336	long-chain fatty-acyl-CoA metabolic process	P	1	1	1.96078	0.144718	OVER	0.0710059	1	E2R7Z9
GO:0046887	positive regulation of hormone secretion	P	1	1	1.96078	0.144718	OVER	0.0710059	1	F1PGS2
GO:0046883	regulation of hormone secretion	P	1	1	1.96078	0.144718	OVER	0.0710059	1	F1PGS2
GO:0046879	hormone secretion	P	1	1	1.96078	0.144718	OVER	0.0710059	1	F1PGS2
GO:0033138	positive regulation of peptidyl-serine phosphorylation	P	1	1	1.96078	0.144718	OVER	0.0710059	1	J9NVE9
GO:0033135	regulation of peptidyl-serine phosphorylation	P	1	1	1.96078	0.144718	OVER	0.0710059	1	J9NVE9
GO:0032039	integrator complex	C	1	1	1.96078	0.144718	OVER	0.0710059	1	E2RL75
GO:0016874	ligase activity	F	1	1	1.96078	0.144718	OVER	0.0710059	1	F1PEH9
GO:0016859	cis-trans isomerase activity	F	1	1	1.96078	0.144718	OVER	0.0710059	1	Q9MZD3
GO:0005985	sucrose metabolic process	P	1	1	1.96078	0.144718	OVER	0.0710059	1	E2R2C3
GO:0005982	starch metabolic process	P	1	1	1.96078	0.144718	OVER	0.0710059	1	E2R2C3
GO:0003755	peptidyl-prolyl cis-trans isomerase activity	F	1	1	1.96078	0.144718	OVER	0.0710059	1	Q9MZD3
GO:0005905	coated pit	C	1	1	1.96078	0.144718	OVER	0.0710059	1	F6X5M3
GO:0005903	brush border	C	1	1	1.96078	0.144718	OVER	0.0710059	1	J9NU17
GO:0005902	microvillus	C	1	1	1.96078	0.144718	OVER	0.0710059	1	J9NU17
GO:0016180	snRNA processing	P	1	1	1.96078	0.144718	OVER	0.0710059	1	E2RL75
GO:0000413	protein peptidyl-prolyl isomerization	P	1	1	1.96078	0.144718	OVER	0.0710059	1	Q9MZD3
GO:0045069	regulation of viral genome replication	P	1	1	1.96078	0.144718	OVER	0.0710059	1	Q9MZD3
GO:0015036	disulfide oxidoreductase activity	F	1	1	1.96078	0.144718	OVER	0.0710059	1	J9NWJ5
GO:0015035	protein disulfide oxidoreductase activity	F	1	1	1.96078	0.144718	OVER	0.0710059	1	J9NWJ5
GO:0015002	heme-copper terminal oxidase activity	F	1	1	1.96078	0.144718	OVER	0.0710059	1	C4MW55
GO:0016790	thiolester hydrolase activity	F	1	1	1.96078	0.144718	OVER	0.0710059	1	E2R7Z9
GO:0034116	positive regulation of heterotypic cell-cell adhesion	P	1	1	1.96078	0.144718	OVER	0.0710059	1	F1PGS2
GO:0034114	regulation of heterotypic cell-cell adhesion	P	1	1	1.96078	0.144718	OVER	0.0710059	1	F1PGS2
GO:0034113	heterotypic cell-cell adhesion	P	1	1	1.96078	0.144718	OVER	0.0710059	1	F1PGS2
GO:0004139	deoxyribose-phosphate aldolase activity	F	1	1	1.96078	0.144718	OVER	0.0710059	1	F1PPB6
GO:0004129	cytochrome-c oxidase activity	F	1	1	1.96078	0.144718	OVER	0.0710059	1	C4MW55
GO:0051047	positive regulation of secretion	P	1	1	1.96078	0.144718	OVER	0.0710059	1	F1PGS2
GO:0003018	vascular process in circulatory system	P	1	1	1.96078	0.144718	OVER	0.0710059	1	F1PGS2
GO:0003007	heart morphogenesis	P	1	1	1.96078	0.144718	OVER	0.0710059	1	F1PP21
GO:0072337	modified amino acid transport	P	1	1	1.96078	0.144718	OVER	0.0710059	1	E2R5U8
GO:0018904	ether metabolic process	P	1	1	1.96078	0.144718	OVER	0.0710059	1	J9NWJ5
GO:1902042	negative regulation of extrinsic apoptotic signaling pathway via death domain receptors	P	1	1	1.96078	0.144718	OVER	0.0710059	1	F1PGS2
GO:0042310	vasoconstriction	P	1	1	1.96078	0.144718	OVER	0.0710059	1	F1PGS2
GO:0048232	male gamete generation	P	1	1	1.96078	0.144718	OVER	0.0710059	1	E2R357
GO:0016073	snRNA metabolic process	P	1	1	1.96078	0.144718	OVER	0.0710059	1	E2RL75
GO:0017157	regulation of exocytosis	P	1	1	1.96078	0.144718	OVER	0.0710059	1	F1PGS2
GO:0010739	positive regulation of protein kinase A signaling	P	1	1	1.96078	0.144718	OVER	0.0710059	1	J9NVE9
GO:0010738	regulation of protein kinase A signaling	P	1	1	1.96078	0.144718	OVER	0.0710059	1	J9NVE9
GO:0010737	protein kinase A signaling	P	1	1	1.96078	0.144718	OVER	0.0710059	1	J9NVE9
GO:0018208	peptidyl-proline modification	P	1	1	1.96078	0.144718	OVER	0.0710059	1	Q9MZD3
GO:0017119	Golgi transport complex	C	1	1	1.96078	0.144718	OVER	0.0710059	1	F1PH83
GO:0035150	regulation of tube size	P	1	1	1.96078	0.144718	OVER	0.0710059	1	F1PGS2
GO:0004089	carbonate dehydratase activity	F	1	1	1.96078	0.144718	OVER	0.0710059	1	F1PBK6
GO:0016676	oxidoreductase activity, acting on a heme group of donors, oxygen as acceptor	F	1	1	1.96078	0.144718	OVER	0.0710059	1	C4MW55
GO:0016675	oxidoreductase activity, acting on a heme group of donors	F	1	1	1.96078	0.144718	OVER	0.0710059	1	C4MW55
GO:0070069	cytochrome complex	C	1	1	1.96078	0.144718	OVER	0.0710059	1	C4MW55
GO:0005798	Golgi-associated vesicle	C	1	1	1.96078	0.144718	OVER	0.0710059	1	F6X5M3
GO:0090277	positive regulation of peptide hormone secretion	P	1	1	1.96078	0.144718	OVER	0.0710059	1	F1PGS2
GO:0090276	regulation of peptide hormone secretion	P	1	1	1.96078	0.144718	OVER	0.0710059	1	F1PGS2
GO:0019229	regulation of vasoconstriction	P	1	1	1.96078	0.144718	OVER	0.0710059	1	F1PGS2
GO:0007283	spermatogenesis	P	1	1	1.96078	0.144718	OVER	0.0710059	1	E2R357
GO:0006123	mitochondrial electron transport, cytochrome c to oxygen	P	1	1	1.96078	0.144718	OVER	0.0710059	1	C4MW55
GO:0023061	signal release	P	1	1	1.96078	0.144718	OVER	0.0710059	1	F1PGS2
GO:0047617	acyl-CoA hydrolase activity	F	1	1	1.96078	0.144718	OVER	0.0710059	1	E2R7Z9
GO:2000352	negative regulation of endothelial cell apoptotic process	P	1	1	1.96078	0.144718	OVER	0.0710059	1	F1PGS2
GO:1904036	negative regulation of epithelial cell apoptotic process	P	1	1	1.96078	0.144718	OVER	0.0710059	1	F1PGS2
GO:0006730	one-carbon metabolic process	P	1	1	1.96078	0.144718	OVER	0.0710059	1	F1PBK6
GO:0030140	trans-Golgi network transport vesicle	C	1	1	1.96078	0.144718	OVER	0.0710059	1	F6X5M3
GO:0030136	clathrin-coated vesicle	C	1	1	1.96078	0.144718	OVER	0.0710059	1	F6X5M3
GO:0030135	coated vesicle	C	1	1	1.96078	0.144718	OVER	0.0710059	1	F6X5M3
GO:0030133	transport vesicle	C	1	1	1.96078	0.144718	OVER	0.0710059	1	F6X5M3
GO:0030132	clathrin coat of coated pit	C	1	1	1.96078	0.144718	OVER	0.0710059	1	F6X5M3
GO:0030130	clathrin coat of trans-Golgi network vesicle	C	1	1	1.96078	0.144718	OVER	0.0710059	1	F6X5M3
GO:0030125	clathrin vesicle coat	C	1	1	1.96078	0.144718	OVER	0.0710059	1	F6X5M3
GO:0030120	vesicle coat	C	1	1	1.96078	0.144718	OVER	0.0710059	1	F6X5M3
GO:0030118	clathrin coat	C	1	1	1.96078	0.144718	OVER	0.0710059	1	F6X5M3
GO:0030117	membrane coat	C	1	1	1.96078	0.144718	OVER	0.0710059	1	F6X5M3
GO:0000139	Golgi membrane	C	1	1	1.96078	0.144718	OVER	0.0710059	1	F6X5M3
GO:1903532	positive regulation of secretion by cell	P	1	1	1.96078	0.144718	OVER	0.0710059	1	F1PGS2
GO:1903524	positive regulation of blood circulation	P	1	1	1.96078	0.144718	OVER	0.0710059	1	F1PGS2
GO:1903522	regulation of blood circulation	P	1	1	1.96078	0.144718	OVER	0.0710059	1	F1PGS2
GO:0098803	respiratory chain complex	C	1	1	1.96078	0.144718	OVER	0.0710059	1	C4MW55
GO:0043152	induction of bacterial agglutination	P	1	1	1.96078	0.144718	OVER	0.0710059	1	F1PGS2
GO:0090087	regulation of peptide transport	P	1	1	1.96078	0.144718	OVER	0.0710059	1	F1PGS2
GO:0006662	glycerol ether metabolic process	P	1	1	1.96078	0.144718	OVER	0.0710059	1	J9NWJ5
GO:0030072	peptide hormone secretion	P	1	1	1.96078	0.144718	OVER	0.0710059	1	F1PGS2
GO:0019079	viral genome replication	P	1	1	1.96078	0.144718	OVER	0.0710059	1	Q9MZD3
GO:1901292	nucleoside phosphate catabolic process	P	1	1	1.96078	0.144718	OVER	0.0710059	1	F1PPB6
GO:0070469	respiratory chain	C	1	1	1.96078	0.144718	OVER	0.0710059	1	C4MW55
GO:0045921	positive regulation of exocytosis	P	1	1	1.96078	0.144718	OVER	0.0710059	1	F1PGS2
GO:0045907	positive regulation of vasoconstriction	P	1	1	1.96078	0.144718	OVER	0.0710059	1	F1PGS2
GO:0009264	deoxyribonucleotide catabolic process	P	1	1	1.96078	0.144718	OVER	0.0710059	1	F1PPB6
GO:0009262	deoxyribonucleotide metabolic process	P	1	1	1.96078	0.144718	OVER	0.0710059	1	F1PPB6
GO:0030665	clathrin-coated vesicle membrane	C	1	1	1.96078	0.144718	OVER	0.0710059	1	F6X5M3
GO:0030662	coated vesicle membrane	C	1	1	1.96078	0.144718	OVER	0.0710059	1	F6X5M3
GO:0030660	Golgi-associated vesicle membrane	C	1	1	1.96078	0.144718	OVER	0.0710059	1	F6X5M3
GO:0050880	regulation of blood vessel size	P	1	1	1.96078	0.144718	OVER	0.0710059	1	F1PGS2
GO:0030658	transport vesicle membrane	C	1	1	1.96078	0.144718	OVER	0.0710059	1	F6X5M3
GO:0045277	respiratory chain complex IV	C	1	1	1.96078	0.144718	OVER	0.0710059	1	C4MW55
GO:0016323	basolateral plasma membrane	C	1	1	1.96078	0.144718	OVER	0.0710059	1	J9NU17
GO:0035457	cellular response to interferon-alpha	P	1	1	1.96078	0.144718	OVER	0.0710059	1	F1PGC3
GO:0035455	response to interferon-alpha	P	1	1	1.96078	0.144718	OVER	0.0710059	1	F1PGC3
GO:0051186	cofactor metabolic process	P	4	23	7.84314	3.32851	OVER	0.0727765	1	F1PPB6, E2R7Z9, E2R2C3, J9NU05
GO:0051641	cellular localization	P	4	23	7.84314	3.32851	OVER	0.0727765	1	J9NU17, F1PH83, F6X5M3, F1PGS2
GO:0044281	small molecule metabolic process	P	8	63	15.6863	9.11722	OVER	0.0746172	1	C4MW55, E2R5U8, F1PPB6, E2R2C3, J9NU05, J9NWJ5, F1PBK6, Q0QEN2
GO:0016829	lyase activity	F	2	7	3.92157	1.01302	OVER	0.0824544	1	F1PPB6, F1PBK6
GO:0044444	cytoplasmic part	C	11	96	21.5686	13.8929	OVER	0.0848712	1	P60529, J9NU17, J9JHF7, P60524, E2R7Z9, F1PYZ1, F1PH83, F6X5M3, F1PGS2, J9JHZ3, Q0QEN2
GO:0005102	receptor binding	F	4	25	7.84314	3.61795	OVER	0.0936552	1	F1P8T3, F1P8G0, F1PBL4, F1PGS2
GO:0044421	extracellular region part	C	8	186	15.6863	26.9175	UNDER	0.0937127	1	E2R5U8, E2R7Z9, F1PTY1, F1P8G0, F1PBL4, F1PGS2, F1Q432, F1PBK6
GO:1901135	carbohydrate derivative metabolic process	P	5	35	9.80392	5.06512	OVER	0.0938386	1	C4MW55, F1PPB6, E2R2C3, J9NU05, Q0QEN2
GO:0065003	macromolecular complex assembly	P	3	16	5.88235	2.31548	OVER	0.0978342	1	F1P8G0, F1PBL4, F1PGS2
GO:0032270	positive regulation of cellular protein metabolic process	P	3	16	5.88235	2.31548	OVER	0.0978342	1	F1P8T3, J9NVE9, F1PGS2
GO:0050776	regulation of immune response	P	0	37	0	5.35456	UNDER	0.10041	1
GO:0030234	enzyme regulator activity	F	0	36	0	5.20984	UNDER	0.100751	1
GO:0016740	transferase activity	F	0	39	0	5.64399	UNDER	0.101894	1
GO:0044702	single organism reproductive process	P	2	8	3.92157	1.15774	OVER	0.105063	1	J9NVT1, E2R357
GO:0022414	reproductive process	P	2	8	3.92157	1.15774	OVER	0.105063	1	J9NVT1, E2R357
GO:0098772	molecular function regulator	F	0	41	0	5.93343	UNDER	0.10614	1
GO:0070011	peptidase activity, acting on L-amino acid peptides	F	1	58	1.96078	8.39363	UNDER	0.111027	1	J9PB81
GO:0008233	peptidase activity	F	1	61	1.96078	8.82779	UNDER	0.112169	1	J9PB81
GO:0005856	cytoskeleton	C	6	43	11.7647	6.22287	OVER	0.113003	1	J9NU17, F1PTY1, E2REU6, F1Q0N9, E2R489, J9NWS3
GO:0051247	positive regulation of protein metabolic process	P	3	17	5.88235	2.4602	OVER	0.113051	1	F1P8T3, J9NVE9, F1PGS2
GO:0051649	establishment of localization in cell	P	3	17	5.88235	2.4602	OVER	0.113051	1	F1PH83, F6X5M3, F1PGS2
GO:0051240	positive regulation of multicellular organismal process	P	3	18	5.88235	2.60492	OVER	0.129119	1	F1P8T3, F1PP21, F1PGS2
GO:0051156	glucose 6-phosphate metabolic process	P	2	9	3.92157	1.30246	OVER	0.129122	1	F1PPB6, E2R2C3
GO:0016853	isomerase activity	F	2	9	3.92157	1.30246	OVER	0.129122	1	E2R2C3, Q9MZD3
GO:0016023	cytoplasmic membrane-bounded vesicle	C	2	9	3.92157	1.30246	OVER	0.129122	1	F6X5M3, F1PGS2
GO:0006739	NADP metabolic process	P	2	9	3.92157	1.30246	OVER	0.129122	1	F1PPB6, E2R2C3
GO:0006098	pentose-phosphate shunt	P	2	9	3.92157	1.30246	OVER	0.129122	1	F1PPB6, E2R2C3
GO:0044446	intracellular organelle part	C	10	92	19.6078	13.314	OVER	0.12972	1	J9NU17, F1PTY1, E2RL75, E2REU6, F1Q0N9, F1PH83, F6X5M3, E2R489, J9NWS3, Q0QEN2
GO:0005615	extracellular space	C	3	96	5.88235	13.8929	UNDER	0.131553	1	F1P8G0, F1PBL4, F1PGS2
GO:0043170	macromolecule metabolic process	P	9	193	17.6471	27.9305	UNDER	0.136836	1	J9PB81, F1P8T3, F1P6H7, E2RL75, E2R2C3, F1PP21, J9NVE9, Q9MZD3, F1PGS2
GO:0034308	primary alcohol metabolic process	P	1	2	1.96078	0.289436	OVER	0.137068	1	E2R5U8
GO:0072577	endothelial cell apoptotic process	P	1	2	1.96078	0.289436	OVER	0.137068	1	F1PGS2
GO:0044769	ATPase activity, coupled to transmembrane movement of ions, rotational mechanism	F	1	2	1.96078	0.289436	OVER	0.137068	1	Q0QEN2
GO:0046933	proton-transporting ATP synthase activity, rotational mechanism	F	1	2	1.96078	0.289436	OVER	0.137068	1	Q0QEN2
GO:0042572	retinol metabolic process	P	1	2	1.96078	0.289436	OVER	0.137068	1	E2R5U8
GO:0051222	positive regulation of protein transport	P	1	2	1.96078	0.289436	OVER	0.137068	1	F1PGS2
GO:0072522	purine-containing compound biosynthetic process	P	1	2	1.96078	0.289436	OVER	0.137068	1	Q0QEN2
GO:0009168	purine ribonucleoside monophosphate biosynthetic process	P	1	2	1.96078	0.289436	OVER	0.137068	1	Q0QEN2
GO:0009163	nucleoside biosynthetic process	P	1	2	1.96078	0.289436	OVER	0.137068	1	Q0QEN2
GO:0009156	ribonucleoside monophosphate biosynthetic process	P	1	2	1.96078	0.289436	OVER	0.137068	1	Q0QEN2
GO:0009152	purine ribonucleotide biosynthetic process	P	1	2	1.96078	0.289436	OVER	0.137068	1	Q0QEN2
GO:0009145	purine nucleoside triphosphate biosynthetic process	P	1	2	1.96078	0.289436	OVER	0.137068	1	Q0QEN2
GO:0009142	nucleoside triphosphate biosynthetic process	P	1	2	1.96078	0.289436	OVER	0.137068	1	Q0QEN2
GO:0050772	positive regulation of axonogenesis	P	1	2	1.96078	0.289436	OVER	0.137068	1	F1P8T3
GO:0050770	regulation of axonogenesis	P	1	2	1.96078	0.289436	OVER	0.137068	1	F1P8T3
GO:0009127	purine nucleoside monophosphate biosynthetic process	P	1	2	1.96078	0.289436	OVER	0.137068	1	Q0QEN2
GO:0009124	nucleoside monophosphate biosynthetic process	P	1	2	1.96078	0.289436	OVER	0.137068	1	Q0QEN2
GO:0009108	coenzyme biosynthetic process	P	1	2	1.96078	0.289436	OVER	0.137068	1	E2R7Z9
GO:0030516	regulation of axon extension	P	1	2	1.96078	0.289436	OVER	0.137068	1	F1P8T3
GO:0045165	cell fate commitment	P	1	2	1.96078	0.289436	OVER	0.137068	1	F1PP21
GO:0050708	regulation of protein secretion	P	1	2	1.96078	0.289436	OVER	0.137068	1	F1PGS2
GO:0022904	respiratory electron transport chain	P	1	2	1.96078	0.289436	OVER	0.137068	1	C4MW55
GO:0022900	electron transport chain	P	1	2	1.96078	0.289436	OVER	0.137068	1	C4MW55
GO:0035384	thioester biosynthetic process	P	1	2	1.96078	0.289436	OVER	0.137068	1	E2R7Z9
GO:0035383	thioester metabolic process	P	1	2	1.96078	0.289436	OVER	0.137068	1	E2R7Z9
GO:1903900	regulation of viral life cycle	P	1	2	1.96078	0.289436	OVER	0.137068	1	Q9MZD3
GO:0033178	proton-transporting two-sector ATPase complex, catalytic domain	C	1	2	1.96078	0.289436	OVER	0.137068	1	Q0QEN2
GO:0008625	extrinsic apoptotic signaling pathway via death domain receptors	P	1	2	1.96078	0.289436	OVER	0.137068	1	F1PGS2
GO:0051188	cofactor biosynthetic process	P	1	2	1.96078	0.289436	OVER	0.137068	1	E2R7Z9
GO:0007507	heart development	P	1	2	1.96078	0.289436	OVER	0.137068	1	F1PP21
GO:0045773	positive regulation of axon extension	P	1	2	1.96078	0.289436	OVER	0.137068	1	F1P8T3
GO:0016832	aldehyde-lyase activity	F	1	2	1.96078	0.289436	OVER	0.137068	1	F1PPB6
GO:0016830	carbon-carbon lyase activity	F	1	2	1.96078	0.289436	OVER	0.137068	1	F1PPB6
GO:0042455	ribonucleoside biosynthetic process	P	1	2	1.96078	0.289436	OVER	0.137068	1	Q0QEN2
GO:0042451	purine nucleoside biosynthetic process	P	1	2	1.96078	0.289436	OVER	0.137068	1	Q0QEN2
GO:0005984	disaccharide metabolic process	P	1	2	1.96078	0.289436	OVER	0.137068	1	E2R2C3
GO:0042445	hormone metabolic process	P	1	2	1.96078	0.289436	OVER	0.137068	1	E2R5U8
GO:0009055	electron carrier activity	F	1	2	1.96078	0.289436	OVER	0.137068	1	C4MW55
GO:1901659	glycosyl compound biosynthetic process	P	1	2	1.96078	0.289436	OVER	0.137068	1	Q0QEN2
GO:0046129	purine ribonucleoside biosynthetic process	P	1	2	1.96078	0.289436	OVER	0.137068	1	Q0QEN2
GO:0009615	response to virus	P	1	2	1.96078	0.289436	OVER	0.137068	1	F1PGC3
GO:0051087	chaperone binding	F	1	2	1.96078	0.289436	OVER	0.137068	1	F1PGS2
GO:0072378	blood coagulation, fibrin clot formation	P	1	2	1.96078	0.289436	OVER	0.137068	1	F1PGS2
GO:0051046	regulation of secretion	P	1	2	1.96078	0.289436	OVER	0.137068	1	F1PGS2
GO:0046700	heterocycle catabolic process	P	1	2	1.96078	0.289436	OVER	0.137068	1	F1PPB6
GO:1902041	regulation of extrinsic apoptotic signaling pathway via death domain receptors	P	1	2	1.96078	0.289436	OVER	0.137068	1	F1PGS2
GO:0034754	cellular hormone metabolic process	P	1	2	1.96078	0.289436	OVER	0.137068	1	E2R5U8
GO:0051648	vesicle localization	P	1	2	1.96078	0.289436	OVER	0.137068	1	J9NU17
GO:0051640	organelle localization	P	1	2	1.96078	0.289436	OVER	0.137068	1	J9NU17
GO:0032504	multicellular organism reproduction	P	1	2	1.96078	0.289436	OVER	0.137068	1	E2R357
GO:1902600	hydrogen ion transmembrane transport	P	1	2	1.96078	0.289436	OVER	0.137068	1	Q0QEN2
GO:0018209	peptidyl-serine modification	P	1	2	1.96078	0.289436	OVER	0.137068	1	J9NVE9
GO:0061387	regulation of extent of cell growth	P	1	2	1.96078	0.289436	OVER	0.137068	1	F1P8T3
GO:0034655	nucleobase-containing compound catabolic process	P	1	2	1.96078	0.289436	OVER	0.137068	1	F1PPB6
GO:0051592	response to calcium ion	P	1	2	1.96078	0.289436	OVER	0.137068	1	F1PGS2
GO:0042886	amide transport	P	1	2	1.96078	0.289436	OVER	0.137068	1	F1PGS2
GO:0008361	regulation of cell size	P	1	2	1.96078	0.289436	OVER	0.137068	1	F1P8T3
GO:0007276	gamete generation	P	1	2	1.96078	0.289436	OVER	0.137068	1	E2R357
GO:0018105	peptidyl-serine phosphorylation	P	1	2	1.96078	0.289436	OVER	0.137068	1	J9NVE9
GO:0031941	filamentous actin	C	1	2	1.96078	0.289436	OVER	0.137068	1	J9NU17
GO:0006164	purine nucleotide biosynthetic process	P	1	2	1.96078	0.289436	OVER	0.137068	1	Q0QEN2
GO:0007229	integrin-mediated signaling pathway	P	1	2	1.96078	0.289436	OVER	0.137068	1	F1P8T3
GO:0016591	DNA-directed RNA polymerase II, holoenzyme	C	1	2	1.96078	0.289436	OVER	0.137068	1	E2RL75
GO:0006118	obsolete electron transport	P	1	2	1.96078	0.289436	OVER	0.137068	1	J9NWJ5
GO:2000351	regulation of endothelial cell apoptotic process	P	1	2	1.96078	0.289436	OVER	0.137068	1	F1PGS2
GO:0006754	ATP biosynthetic process	P	1	2	1.96078	0.289436	OVER	0.137068	1	Q0QEN2
GO:0030199	collagen fibril organization	P	1	2	1.96078	0.289436	OVER	0.137068	1	F1Q432
GO:0097191	extrinsic apoptotic signaling pathway	P	1	2	1.96078	0.289436	OVER	0.137068	1	F1PGS2
GO:0042775	mitochondrial ATP synthesis coupled electron transport	P	1	2	1.96078	0.289436	OVER	0.137068	1	C4MW55
GO:0042773	ATP synthesis coupled electron transport	P	1	2	1.96078	0.289436	OVER	0.137068	1	C4MW55
GO:1901361	organic cyclic compound catabolic process	P	1	2	1.96078	0.289436	OVER	0.137068	1	F1PPB6
GO:1903530	regulation of secretion by cell	P	1	2	1.96078	0.289436	OVER	0.137068	1	F1PGS2
GO:0071616	acyl-CoA biosynthetic process	P	1	2	1.96078	0.289436	OVER	0.137068	1	E2R7Z9
GO:0070527	platelet aggregation	P	1	2	1.96078	0.289436	OVER	0.137068	1	F1PGS2
GO:0050996	positive regulation of lipid catabolic process	P	1	2	1.96078	0.289436	OVER	0.137068	1	J9NVE9
GO:0050994	regulation of lipid catabolic process	P	1	2	1.96078	0.289436	OVER	0.137068	1	J9NVE9
GO:0009311	oligosaccharide metabolic process	P	1	2	1.96078	0.289436	OVER	0.137068	1	E2R2C3
GO:0048675	axon extension	P	1	2	1.96078	0.289436	OVER	0.137068	1	F1P8T3
GO:0009306	protein secretion	P	1	2	1.96078	0.289436	OVER	0.137068	1	F1PGS2
GO:0044270	cellular nitrogen compound catabolic process	P	1	2	1.96078	0.289436	OVER	0.137068	1	F1PPB6
GO:0019731	antibacterial humoral response	P	1	2	1.96078	0.289436	OVER	0.137068	1	F1PGS2
GO:0019730	antimicrobial humoral response	P	1	2	1.96078	0.289436	OVER	0.137068	1	F1PGS2
GO:0016469	proton-transporting two-sector ATPase complex	C	1	2	1.96078	0.289436	OVER	0.137068	1	Q0QEN2
GO:0048609	multicellular organismal reproductive process	P	1	2	1.96078	0.289436	OVER	0.137068	1	E2R357
GO:0006637	acyl-CoA metabolic process	P	1	2	1.96078	0.289436	OVER	0.137068	1	E2R7Z9
GO:0015991	ATP hydrolysis coupled proton transport	P	1	2	1.96078	0.289436	OVER	0.137068	1	Q0QEN2
GO:0015988	energy coupled proton transmembrane transport, against electrochemical gradient	P	1	2	1.96078	0.289436	OVER	0.137068	1	Q0QEN2
GO:0015986	ATP synthesis coupled proton transport	P	1	2	1.96078	0.289436	OVER	0.137068	1	Q0QEN2
GO:0015985	energy coupled proton transport, down electrochemical gradient	P	1	2	1.96078	0.289436	OVER	0.137068	1	Q0QEN2
GO:0022409	positive regulation of cell-cell adhesion	P	1	2	1.96078	0.289436	OVER	0.137068	1	F1PGS2
GO:0009260	ribonucleotide biosynthetic process	P	1	2	1.96078	0.289436	OVER	0.137068	1	Q0QEN2
GO:0046390	ribose phosphate biosynthetic process	P	1	2	1.96078	0.289436	OVER	0.137068	1	Q0QEN2
GO:0009206	purine ribonucleoside triphosphate biosynthetic process	P	1	2	1.96078	0.289436	OVER	0.137068	1	Q0QEN2
GO:0009201	ribonucleoside triphosphate biosynthetic process	P	1	2	1.96078	0.289436	OVER	0.137068	1	Q0QEN2
GO:0045259	proton-transporting ATP synthase complex	C	1	2	1.96078	0.289436	OVER	0.137068	1	Q0QEN2
GO:0016328	lateral plasma membrane	C	1	2	1.96078	0.289436	OVER	0.137068	1	J9NU17
GO:2001237	negative regulation of extrinsic apoptotic signaling pathway	P	1	2	1.96078	0.289436	OVER	0.137068	1	F1PGS2
GO:2001236	regulation of extrinsic apoptotic signaling pathway	P	1	2	1.96078	0.289436	OVER	0.137068	1	F1PGS2
GO:2001234	negative regulation of apoptotic signaling pathway	P	1	2	1.96078	0.289436	OVER	0.137068	1	F1PGS2
GO:0031091	platelet alpha granule	C	1	2	1.96078	0.289436	OVER	0.137068	1	F1PGS2
GO:0006810	transport	P	11	102	21.5686	14.7612	OVER	0.140072	1	C4MW55, E2R5U8, P60529, J9JHF7, P60524, F1PYZ1, F1PH83, F6X5M3, F1PGS2, J9JHZ3, Q0QEN2
GO:0051234	establishment of localization	P	11	103	21.5686	14.9059	OVER	0.142669	1	C4MW55, E2R5U8, P60529, J9JHF7, P60524, F1PYZ1, F1PH83, F6X5M3, F1PGS2, J9JHZ3, Q0QEN2
GO:0043933	macromolecular complex subunit organization	P	4	29	7.84314	4.19682	OVER	0.14288	1	F1P8G0, F1PBL4, F1PGS2, F1Q432
GO:0046496	nicotinamide nucleotide metabolic process	P	3	19	5.88235	2.74964	OVER	0.14596	1	F1PPB6, E2R2C3, J9NU05
GO:0050794	regulation of cellular process	P	11	220	21.5686	31.8379	UNDER	0.153087	1	F1PDY8, F1P8T3, F1P6H7, F1PF31, F1P8G0, F1PP21, J9NVE9, F1PBL4, Q9MZD3, F1PGS2, J9NWJ5
GO:0031410	cytoplasmic vesicle	C	2	10	3.92157	1.44718	OVER	0.154322	1	F6X5M3, F1PGS2
GO:0019682	glyceraldehyde-3-phosphate metabolic process	P	2	10	3.92157	1.44718	OVER	0.154322	1	F1PPB6, E2R2C3
GO:0008270	zinc ion binding	F	4	30	7.84314	4.34153	OVER	0.15657	1	J9NYN2, E2RH23, F1PP21, F1PBK6
GO:0060089	molecular transducer activity	F	0	31	0	4.48625	UNDER	0.157458	1
GO:0044765	single-organism transport	P	9	80	17.6471	11.5774	OVER	0.159055	1	C4MW55, E2R5U8, P60529, J9JHF7, P60524, F1PYZ1, F1PGS2, J9JHZ3, Q0QEN2
GO:0002253	activation of immune response	P	0	34	0	4.92041	UNDER	0.161408	1
GO:0072524	pyridine-containing compound metabolic process	P	3	20	5.88235	2.89436	OVER	0.163492	1	F1PPB6, E2R2C3, J9NU05
GO:0006468	protein phosphorylation	P	3	20	5.88235	2.89436	OVER	0.163492	1	F1P8T3, J9NVE9, F1PGS2
GO:0019362	pyridine nucleotide metabolic process	P	3	20	5.88235	2.89436	OVER	0.163492	1	F1PPB6, E2R2C3, J9NU05
GO:0006733	oxidoreduction coenzyme metabolic process	P	3	20	5.88235	2.89436	OVER	0.163492	1	F1PPB6, E2R2C3, J9NU05
GO:0009059	macromolecule biosynthetic process	P	1	52	1.96078	7.52533	UNDER	0.164387	1	J9NVE9
GO:0050778	positive regulation of immune response	P	0	35	0	5.06512	UNDER	0.164659	1
GO:1902578	single-organism localization	P	9	83	17.6471	12.0116	OVER	0.16919	1	C4MW55, E2R5U8, P60529, J9JHF7, P60524, F1PYZ1, F1PGS2, J9JHZ3, Q0QEN2
GO:0016787	hydrolase activity	F	5	124	9.80392	17.945	UNDER	0.17593	1	J9PB81, J9NU17, E2R7Z9, F1PBK6, Q0QEN2
GO:0051179	localization	P	13	129	25.4902	18.6686	OVER	0.179743	1	C4MW55, E2R5U8, F1P8T3, P60529, J9NU17, J9JHF7, P60524, F1PYZ1, F1PH83, F6X5M3, F1PGS2, J9JHZ3, Q0QEN2
GO:0022890	inorganic cation transmembrane transporter activity	F	2	11	3.92157	1.5919	OVER	0.180388	1	C4MW55, Q0QEN2
GO:0070727	cellular macromolecule localization	P	2	11	3.92157	1.5919	OVER	0.180388	1	F1PH83, F6X5M3
GO:0005794	Golgi apparatus	C	2	11	3.92157	1.5919	OVER	0.180388	1	F1PH83, F6X5M3
GO:0034613	cellular protein localization	P	2	11	3.92157	1.5919	OVER	0.180388	1	F1PH83, F6X5M3
GO:0008324	cation transmembrane transporter activity	F	2	11	3.92157	1.5919	OVER	0.180388	1	C4MW55, Q0QEN2
GO:0006790	sulfur compound metabolic process	P	2	11	3.92157	1.5919	OVER	0.180388	1	E2R7Z9, J9NU05
GO:0098796	membrane protein complex	C	3	21	5.88235	3.03907	OVER	0.181636	1	C4MW55, F6X5M3, Q0QEN2
GO:0008104	protein localization	P	3	21	5.88235	3.03907	OVER	0.181636	1	F1PH83, F6X5M3, F1PGS2
GO:0044422	organelle part	C	10	94	19.6078	13.6035	OVER	0.190027	1	J9NU17, F1PTY1, E2RL75, E2REU6, F1Q0N9, F1PH83, F6X5M3, E2R489, J9NWS3, Q0QEN2
GO:0006534	cysteine metabolic process	P	1	3	1.96078	0.434153	OVER	0.198523	1	J9NU05
GO:0051223	regulation of protein transport	P	1	3	1.96078	0.434153	OVER	0.198523	1	F1PGS2
GO:0044703	multi-organism reproductive process	P	1	3	1.96078	0.434153	OVER	0.198523	1	E2R357
GO:0060560	developmental growth involved in morphogenesis	P	1	3	1.96078	0.434153	OVER	0.198523	1	F1P8T3
GO:1901136	carbohydrate derivative catabolic process	P	1	3	1.96078	0.434153	OVER	0.198523	1	F1PPB6
GO:0009165	nucleotide biosynthetic process	P	1	3	1.96078	0.434153	OVER	0.198523	1	Q0QEN2
GO:0050792	regulation of viral process	P	1	3	1.96078	0.434153	OVER	0.198523	1	Q9MZD3
GO:0001649	osteoblast differentiation	P	1	3	1.96078	0.434153	OVER	0.198523	1	F1P8T3
GO:0010976	positive regulation of neuron projection development	P	1	3	1.96078	0.434153	OVER	0.198523	1	F1P8T3
GO:0006457	protein folding	P	1	3	1.96078	0.434153	OVER	0.198523	1	Q9MZD3
GO:0045785	positive regulation of cell adhesion	P	1	3	1.96078	0.434153	OVER	0.198523	1	F1PGS2
GO:0016861	intramolecular oxidoreductase activity, interconverting aldoses and ketoses	F	1	3	1.96078	0.434153	OVER	0.198523	1	E2R2C3
GO:0016860	intramolecular oxidoreductase activity	F	1	3	1.96078	0.434153	OVER	0.198523	1	E2R2C3
GO:0070201	regulation of establishment of protein localization	P	1	3	1.96078	0.434153	OVER	0.198523	1	F1PGS2
GO:0005938	cell cortex	C	1	3	1.96078	0.434153	OVER	0.198523	1	J9NU17
GO:0001523	retinoid metabolic process	P	1	3	1.96078	0.434153	OVER	0.198523	1	E2R5U8
GO:0000428	DNA-directed RNA polymerase complex	C	1	3	1.96078	0.434153	OVER	0.198523	1	E2RL75
GO:0019439	aromatic compound catabolic process	P	1	3	1.96078	0.434153	OVER	0.198523	1	F1PPB6
GO:0016101	diterpenoid metabolic process	P	1	3	1.96078	0.434153	OVER	0.198523	1	E2R5U8
GO:0045666	positive regulation of neuron differentiation	P	1	3	1.96078	0.434153	OVER	0.198523	1	F1P8T3
GO:0005884	actin filament	C	1	3	1.96078	0.434153	OVER	0.198523	1	J9NU17
GO:0006953	acute-phase response	P	1	3	1.96078	0.434153	OVER	0.198523	1	J9NVE9
GO:0030307	positive regulation of cell growth	P	1	3	1.96078	0.434153	OVER	0.198523	1	F1P8T3
GO:0010770	positive regulation of cell morphogenesis involved in differentiation	P	1	3	1.96078	0.434153	OVER	0.198523	1	F1P8T3
GO:0004064	arylesterase activity	F	1	3	1.96078	0.434153	OVER	0.198523	1	F1PBK6
GO:0019953	sexual reproduction	P	1	3	1.96078	0.434153	OVER	0.198523	1	E2R357
GO:0016667	oxidoreductase activity, acting on a sulfur group of donors	F	1	3	1.96078	0.434153	OVER	0.198523	1	J9NWJ5
GO:0044448	cell cortex part	C	1	3	1.96078	0.434153	OVER	0.198523	1	J9NU17
GO:0010038	response to metal ion	P	1	3	1.96078	0.434153	OVER	0.198523	1	F1PGS2
GO:0097285	cell-type specific apoptotic process	P	1	3	1.96078	0.434153	OVER	0.198523	1	F1PGS2
GO:0030880	RNA polymerase complex	C	1	3	1.96078	0.434153	OVER	0.198523	1	E2RL75
GO:0030864	cortical actin cytoskeleton	C	1	3	1.96078	0.434153	OVER	0.198523	1	J9NU17
GO:0030863	cortical cytoskeleton	C	1	3	1.96078	0.434153	OVER	0.198523	1	J9NU17
GO:0006119	oxidative phosphorylation	P	1	3	1.96078	0.434153	OVER	0.198523	1	C4MW55
GO:1904035	regulation of epithelial cell apoptotic process	P	1	3	1.96078	0.434153	OVER	0.198523	1	F1PGS2
GO:1904019	epithelial cell apoptotic process	P	1	3	1.96078	0.434153	OVER	0.198523	1	F1PGS2
GO:0006721	terpenoid metabolic process	P	1	3	1.96078	0.434153	OVER	0.198523	1	E2R5U8
GO:0006720	isoprenoid metabolic process	P	1	3	1.96078	0.434153	OVER	0.198523	1	E2R5U8
GO:0048639	positive regulation of developmental growth	P	1	3	1.96078	0.434153	OVER	0.198523	1	F1P8T3
GO:0048638	regulation of developmental growth	P	1	3	1.96078	0.434153	OVER	0.198523	1	F1P8T3
GO:0044272	sulfur compound biosynthetic process	P	1	3	1.96078	0.434153	OVER	0.198523	1	E2R7Z9
GO:0004459	L-lactate dehydrogenase activity	F	1	3	1.96078	0.434153	OVER	0.198523	1	J9NU05
GO:0004457	lactate dehydrogenase activity	F	1	3	1.96078	0.434153	OVER	0.198523	1	J9NU05
GO:1901293	nucleoside phosphate biosynthetic process	P	1	3	1.96078	0.434153	OVER	0.198523	1	Q0QEN2
GO:1990138	neuron projection extension	P	1	3	1.96078	0.434153	OVER	0.198523	1	F1P8T3
GO:0045927	positive regulation of growth	P	1	3	1.96078	0.434153	OVER	0.198523	1	F1P8T3
GO:0019058	viral life cycle	P	1	3	1.96078	0.434153	OVER	0.198523	1	Q9MZD3
GO:0048588	developmental cell growth	P	1	3	1.96078	0.434153	OVER	0.198523	1	F1P8T3
GO:0055029	nuclear DNA-directed RNA polymerase complex	C	1	3	1.96078	0.434153	OVER	0.198523	1	E2RL75
GO:0009897	external side of plasma membrane	C	1	3	1.96078	0.434153	OVER	0.198523	1	F1PGS2
GO:0046907	intracellular transport	P	2	12	3.92157	1.73661	OVER	0.207077	1	F1PH83, F6X5M3
GO:0044238	primary metabolic process	P	13	242	25.4902	35.0217	UNDER	0.213999	1	J9PB81, C4MW55, E2R5U8, F1P8T3, F1PPB6, E2RL75, E2R2C3, F1PP21, J9NVE9, J9NU05, Q9MZD3, F1PGS2, Q0QEN2
GO:0006508	proteolysis	P	2	71	3.92157	10.275	UNDER	0.217139	1	J9PB81, F1PGS2
GO:0007596	blood coagulation	P	3	23	5.88235	3.32851	OVER	0.219443	1	F1P8G0, F1PBL4, F1PGS2
GO:0006091	generation of precursor metabolites and energy	P	3	23	5.88235	3.32851	OVER	0.219443	1	C4MW55, E2R2C3, J9NU05
GO:0035556	intracellular signal transduction	P	3	23	5.88235	3.32851	OVER	0.219443	1	F1P8T3, J9NVE9, F1PGS2
GO:0050817	coagulation	P	3	23	5.88235	3.32851	OVER	0.219443	1	F1P8G0, F1PBL4, F1PGS2
GO:0015075	ion transmembrane transporter activity	F	2	13	3.92157	1.88133	OVER	0.234175	1	C4MW55, Q0QEN2
GO:0030182	neuron differentiation	P	2	13	3.92157	1.88133	OVER	0.234175	1	F1P8T3, F1PP21
GO:0006081	cellular aldehyde metabolic process	P	2	13	3.92157	1.88133	OVER	0.234175	1	F1PPB6, E2R2C3
GO:0098805	whole membrane	C	2	13	3.92157	1.88133	OVER	0.234175	1	J9NU17, F6X5M3
GO:0002376	immune system process	P	5	121	9.80392	17.5109	UNDER	0.238791	1	J9PB81, F1P8T3, J9P0D4, J9P9B9, F1PGS2
GO:0007599	hemostasis	P	3	24	5.88235	3.47323	OVER	0.238952	1	F1P8G0, F1PBL4, F1PGS2
GO:0009966	regulation of signal transduction	P	3	24	5.88235	3.47323	OVER	0.238952	1	F1P8T3, J9NVE9, F1PGS2
GO:0004175	endopeptidase activity	F	1	49	1.96078	7.09117	UNDER	0.243271	1	J9PB81
GO:0016021	integral component of membrane	C	1	49	1.96078	7.09117	UNDER	0.243271	1	C4MW55
GO:0034645	cellular macromolecule biosynthetic process	P	1	49	1.96078	7.09117	UNDER	0.243271	1	J9NVE9
GO:0030414	peptidase inhibitor activity	F	0	25	0	3.61795	UNDER	0.246839	1
GO:1902589	single-organism organelle organization	P	0	25	0	3.61795	UNDER	0.246839	1
GO:0004857	enzyme inhibitor activity	F	0	27	0	3.90738	UNDER	0.248508	1
GO:0061134	peptidase regulator activity	F	0	27	0	3.90738	UNDER	0.248508	1
GO:0031224	intrinsic component of membrane	C	1	51	1.96078	7.38061	UNDER	0.248643	1	C4MW55
GO:0004872	receptor activity	F	0	28	0	4.0521	UNDER	0.251403	1
GO:0006897	endocytosis	P	0	28	0	4.0521	UNDER	0.251403	1
GO:0048583	regulation of response to stimulus	P	3	83	5.88235	12.0116	UNDER	0.253859	1	F1P8T3, J9NVE9, F1PGS2
GO:0065009	regulation of molecular function	P	0	29	0	4.19682	UNDER	0.255558	1
GO:0007605	sensory perception of sound	P	1	4	1.96078	0.578871	OVER	0.255686	1	J9NU17
GO:0044764	multi-organism cellular process	P	1	4	1.96078	0.578871	OVER	0.255686	1	Q9MZD3
GO:0012506	vesicle membrane	C	1	4	1.96078	0.578871	OVER	0.255686	1	F6X5M3
GO:0031639	plasminogen activation	P	1	4	1.96078	0.578871	OVER	0.255686	1	F1PGS2
GO:0031638	zymogen activation	P	1	4	1.96078	0.578871	OVER	0.255686	1	F1PGS2
GO:0008015	blood circulation	P	1	4	1.96078	0.578871	OVER	0.255686	1	F1PGS2
GO:0044042	glucan metabolic process	P	1	4	1.96078	0.578871	OVER	0.255686	1	E2R2C3
GO:0016836	hydro-lyase activity	F	1	4	1.96078	0.578871	OVER	0.255686	1	F1PBK6
GO:0016835	carbon-oxygen lyase activity	F	1	4	1.96078	0.578871	OVER	0.255686	1	F1PBK6
GO:0016820	hydrolase activity, acting on acid anhydrides, catalyzing transmembrane movement of substances	F	1	4	1.96078	0.578871	OVER	0.255686	1	Q0QEN2
GO:0005976	polysaccharide metabolic process	P	1	4	1.96078	0.578871	OVER	0.255686	1	E2R2C3
GO:0090407	organophosphate biosynthetic process	P	1	4	1.96078	0.578871	OVER	0.255686	1	Q0QEN2
GO:0098590	plasma membrane region	C	1	4	1.96078	0.578871	OVER	0.255686	1	J9NU17
GO:0098552	side of membrane	C	1	4	1.96078	0.578871	OVER	0.255686	1	F1PGS2
GO:0098542	defense response to other organism	P	1	4	1.96078	0.578871	OVER	0.255686	1	F1PGS2
GO:0007409	axonogenesis	P	1	4	1.96078	0.578871	OVER	0.255686	1	F1P8T3
GO:0003013	circulatory system process	P	1	4	1.96078	0.578871	OVER	0.255686	1	F1PGS2
GO:0032535	regulation of cellular component size	P	1	4	1.96078	0.578871	OVER	0.255686	1	F1P8T3
GO:0002526	acute inflammatory response	P	1	4	1.96078	0.578871	OVER	0.255686	1	J9NVE9
GO:0010769	regulation of cell morphogenesis involved in differentiation	P	1	4	1.96078	0.578871	OVER	0.255686	1	F1P8T3
GO:0016032	viral process	P	1	4	1.96078	0.578871	OVER	0.255686	1	Q9MZD3
GO:0006887	exocytosis	P	1	4	1.96078	0.578871	OVER	0.255686	1	F1PGS2
GO:0044429	mitochondrial part	C	1	4	1.96078	0.578871	OVER	0.255686	1	Q0QEN2
GO:0010035	response to inorganic substance	P	1	4	1.96078	0.578871	OVER	0.255686	1	F1PGS2
GO:0043903	regulation of symbiosis, encompassing mutualism through parasitism	P	1	4	1.96078	0.578871	OVER	0.255686	1	Q9MZD3
GO:0043900	regulation of multi-organism process	P	1	4	1.96078	0.578871	OVER	0.255686	1	Q9MZD3
GO:0019829	cation-transporting ATPase activity	F	1	4	1.96078	0.578871	OVER	0.255686	1	Q0QEN2
GO:0015405	P-P-bond-hydrolysis-driven transmembrane transporter activity	F	1	4	1.96078	0.578871	OVER	0.255686	1	Q0QEN2
GO:0030141	secretory granule	C	1	4	1.96078	0.578871	OVER	0.255686	1	F1PGS2
GO:0097190	apoptotic signaling pathway	P	1	4	1.96078	0.578871	OVER	0.255686	1	F1PGS2
GO:0042742	defense response to bacterium	P	1	4	1.96078	0.578871	OVER	0.255686	1	F1PGS2
GO:0006073	cellular glucan metabolic process	P	1	4	1.96078	0.578871	OVER	0.255686	1	E2R2C3
GO:0050954	sensory perception of mechanical stimulus	P	1	4	1.96078	0.578871	OVER	0.255686	1	J9NU17
GO:0015399	primary active transmembrane transporter activity	F	1	4	1.96078	0.578871	OVER	0.255686	1	Q0QEN2
GO:0044264	cellular polysaccharide metabolic process	P	1	4	1.96078	0.578871	OVER	0.255686	1	E2R2C3
GO:0000096	sulfur amino acid metabolic process	P	1	4	1.96078	0.578871	OVER	0.255686	1	J9NU05
GO:0000003	reproduction	P	1	4	1.96078	0.578871	OVER	0.255686	1	E2R357
GO:0022407	regulation of cell-cell adhesion	P	1	4	1.96078	0.578871	OVER	0.255686	1	F1PGS2
GO:0042626	ATPase activity, coupled to transmembrane movement of substances	F	1	4	1.96078	0.578871	OVER	0.255686	1	Q0QEN2
GO:0042625	ATPase activity, coupled to transmembrane movement of ions	F	1	4	1.96078	0.578871	OVER	0.255686	1	Q0QEN2
GO:0030659	cytoplasmic vesicle membrane	C	1	4	1.96078	0.578871	OVER	0.255686	1	F6X5M3
GO:0060627	regulation of vesicle-mediated transport	P	1	4	1.96078	0.578871	OVER	0.255686	1	F1PGS2
GO:0048589	developmental growth	P	1	4	1.96078	0.578871	OVER	0.255686	1	F1P8T3
GO:0050839	cell adhesion molecule binding	F	1	4	1.96078	0.578871	OVER	0.255686	1	F1PGS2
GO:2001233	regulation of apoptotic signaling pathway	P	1	4	1.96078	0.578871	OVER	0.255686	1	F1PGS2
GO:0046939	nucleotide phosphorylation	P	2	14	3.92157	2.02605	OVER	0.261495	1	E2R2C3, J9NU05
GO:0044724	single-organism carbohydrate catabolic process	P	2	14	3.92157	2.02605	OVER	0.261495	1	E2R2C3, J9NU05
GO:0009185	ribonucleoside diphosphate metabolic process	P	2	14	3.92157	2.02605	OVER	0.261495	1	E2R2C3, J9NU05
GO:0009179	purine ribonucleoside diphosphate metabolic process	P	2	14	3.92157	2.02605	OVER	0.261495	1	E2R2C3, J9NU05
GO:0009135	purine nucleoside diphosphate metabolic process	P	2	14	3.92157	2.02605	OVER	0.261495	1	E2R2C3, J9NU05
GO:0009132	nucleoside diphosphate metabolic process	P	2	14	3.92157	2.02605	OVER	0.261495	1	E2R2C3, J9NU05
GO:0022891	substrate-specific transmembrane transporter activity	F	2	14	3.92157	2.02605	OVER	0.261495	1	C4MW55, Q0QEN2
GO:0046031	ADP metabolic process	P	2	14	3.92157	2.02605	OVER	0.261495	1	E2R2C3, J9NU05
GO:0016052	carbohydrate catabolic process	P	2	14	3.92157	2.02605	OVER	0.261495	1	E2R2C3, J9NU05
GO:0019319	hexose biosynthetic process	P	2	14	3.92157	2.02605	OVER	0.261495	1	E2R2C3, J9NU05
GO:0006165	nucleoside diphosphate phosphorylation	P	2	14	3.92157	2.02605	OVER	0.261495	1	E2R2C3, J9NU05
GO:0006757	ATP generation from ADP	P	2	14	3.92157	2.02605	OVER	0.261495	1	E2R2C3, J9NU05
GO:0006096	glycolytic process	P	2	14	3.92157	2.02605	OVER	0.261495	1	E2R2C3, J9NU05
GO:0006094	gluconeogenesis	P	2	14	3.92157	2.02605	OVER	0.261495	1	E2R2C3, J9NU05
GO:0006006	glucose metabolic process	P	2	14	3.92157	2.02605	OVER	0.261495	1	E2R2C3, J9NU05
GO:0071702	organic substance transport	P	4	31	7.84314	4.48625	OVER	0.267311	1	E2R5U8, F1PH83, F6X5M3, F1PGS2
GO:0003008	system process	P	2	15	3.92157	2.17077	OVER	0.288872	1	J9NU17, F1PGS2
GO:0022008	neurogenesis	P	2	15	3.92157	2.17077	OVER	0.288872	1	F1P8T3, F1PP21
GO:0048699	generation of neurons	P	2	15	3.92157	2.17077	OVER	0.288872	1	F1P8T3, F1PP21
GO:0016020	membrane	C	8	160	15.6863	23.1548	UNDER	0.291677	1	C4MW55, F1P8T3, J9NU17, F1P8A6, E2RP87, F6X5M3, F1PGS2, Q0QEN2
GO:0005634	nucleus	C	2	61	3.92157	8.82779	UNDER	0.3002	1	E2RL75, E2RH23
GO:0044712	single-organism catabolic process	P	4	35	7.84314	5.06512	OVER	0.302363	1	F1PPB6, E2R2C3, J9NVE9, J9NU05
GO:0006955	immune response	P	2	64	3.92157	9.26194	UNDER	0.302582	1	F1P8T3, F1PGS2
GO:0048522	positive regulation of cellular process	P	7	66	13.7255	9.55137	OVER	0.307285	1	F1P8T3, F1P6H7, F1P8G0, F1PP21, J9NVE9, F1PBL4, F1PGS2
GO:0045834	positive regulation of lipid metabolic process	P	1	5	1.96078	0.723589	OVER	0.308851	1	J9NVE9
GO:0061695	transferase complex, transferring phosphorus-containing groups	C	1	5	1.96078	0.723589	OVER	0.308851	1	E2RL75
GO:0046903	secretion	P	1	5	1.96078	0.723589	OVER	0.308851	1	F1PGS2
GO:0050769	positive regulation of neurogenesis	P	1	5	1.96078	0.723589	OVER	0.308851	1	F1P8T3
GO:0061564	axon development	P	1	5	1.96078	0.723589	OVER	0.308851	1	F1P8T3
GO:0007417	central nervous system development	P	1	5	1.96078	0.723589	OVER	0.308851	1	F1PP21
GO:0043492	ATPase activity, coupled to movement of substances	F	1	5	1.96078	0.723589	OVER	0.308851	1	Q0QEN2
GO:0034109	homotypic cell-cell adhesion	P	1	5	1.96078	0.723589	OVER	0.308851	1	F1PGS2
GO:0051604	protein maturation	P	1	5	1.96078	0.723589	OVER	0.308851	1	F1PGS2
GO:0044451	nucleoplasm part	C	1	5	1.96078	0.723589	OVER	0.308851	1	E2RL75
GO:0044433	cytoplasmic vesicle part	C	1	5	1.96078	0.723589	OVER	0.308851	1	F6X5M3
GO:0044419	interspecies interaction between organisms	P	1	5	1.96078	0.723589	OVER	0.308851	1	Q9MZD3
GO:0044403	symbiosis, encompassing mutualism through parasitism	P	1	5	1.96078	0.723589	OVER	0.308851	1	Q9MZD3
GO:0031346	positive regulation of cell projection organization	P	1	5	1.96078	0.723589	OVER	0.308851	1	F1P8T3
GO:0010648	negative regulation of cell communication	P	1	5	1.96078	0.723589	OVER	0.308851	1	F1PGS2
GO:0023057	negative regulation of signaling	P	1	5	1.96078	0.723589	OVER	0.308851	1	F1PGS2
GO:0042730	fibrinolysis	P	1	5	1.96078	0.723589	OVER	0.308851	1	F1PGS2
GO:0032940	secretion by cell	P	1	5	1.96078	0.723589	OVER	0.308851	1	F1PGS2
GO:0048667	cell morphogenesis involved in neuron differentiation	P	1	5	1.96078	0.723589	OVER	0.308851	1	F1P8T3
GO:0001819	positive regulation of cytokine production	P	1	5	1.96078	0.723589	OVER	0.308851	1	F1PP21
GO:0016485	protein processing	P	1	5	1.96078	0.723589	OVER	0.308851	1	F1PGS2
GO:0009968	negative regulation of signal transduction	P	1	5	1.96078	0.723589	OVER	0.308851	1	F1PGS2
GO:0034470	ncRNA processing	P	1	5	1.96078	0.723589	OVER	0.308851	1	E2RL75
GO:0005507	copper ion binding	F	1	5	1.96078	0.723589	OVER	0.308851	1	C4MW55
GO:0032880	regulation of protein localization	P	1	5	1.96078	0.723589	OVER	0.308851	1	F1PGS2
GO:0051962	positive regulation of nervous system development	P	1	5	1.96078	0.723589	OVER	0.308851	1	F1P8T3
GO:0009896	positive regulation of catabolic process	P	1	5	1.96078	0.723589	OVER	0.308851	1	J9NVE9
GO:0043069	negative regulation of programmed cell death	P	1	5	1.96078	0.723589	OVER	0.308851	1	F1PGS2
GO:0043066	negative regulation of apoptotic process	P	1	5	1.96078	0.723589	OVER	0.308851	1	F1PGS2
GO:0022857	transmembrane transporter activity	F	2	16	3.92157	2.31548	OVER	0.316163	1	C4MW55, Q0QEN2
GO:0019318	hexose metabolic process	P	2	16	3.92157	2.31548	OVER	0.316163	1	E2R2C3, J9NU05
GO:0006090	pyruvate metabolic process	P	2	16	3.92157	2.31548	OVER	0.316163	1	E2R2C3, J9NU05
GO:0046364	monosaccharide biosynthetic process	P	2	16	3.92157	2.31548	OVER	0.316163	1	E2R2C3, J9NU05
GO:0006139	nucleobase-containing compound metabolic process	P	7	69	13.7255	9.98553	OVER	0.318624	1	C4MW55, F1PPB6, E2RL75, E2R2C3, J9NVE9, J9NU05, Q0QEN2
GO:0009605	response to external stimulus	P	4	37	7.84314	5.35456	OVER	0.324464	1	J9PB81, F1P8T3, F1PGS2, F1PGC3
GO:0003824	catalytic activity	F	12	213	23.5294	30.8249	UNDER	0.339014	1	J9PB81, C4MW55, F1PPB6, J9NU17, E2R7Z9, E2R2C3, F1PEH9, J9NU05, Q9MZD3, J9NWJ5, F1PBK6, Q0QEN2
GO:0032101	regulation of response to external stimulus	P	2	17	3.92157	2.4602	OVER	0.343245	1	F1P8T3, F1PGS2
GO:0044710	single-organism metabolic process	P	12	136	23.5294	19.6816	OVER	0.356254	1	C4MW55, E2R5U8, F1P8T3, F1PPB6, E2R2C3, J9NVE9, J9NU05, F1PGS2, F1Q432, J9NWJ5, F1PBK6, Q0QEN2
GO:2000113	negative regulation of cellular macromolecule biosynthetic process	P	1	6	1.96078	0.868307	OVER	0.358293	1	J9NVE9
GO:0045892	negative regulation of transcription, DNA-templated	P	1	6	1.96078	0.868307	OVER	0.358293	1	J9NVE9
GO:0061045	negative regulation of wound healing	P	1	6	1.96078	0.868307	OVER	0.358293	1	F1PGS2
GO:0051253	negative regulation of RNA metabolic process	P	1	6	1.96078	0.868307	OVER	0.358293	1	J9NVE9
GO:1900047	negative regulation of hemostasis	P	1	6	1.96078	0.868307	OVER	0.358293	1	F1PGS2
GO:0060548	negative regulation of cell death	P	1	6	1.96078	0.868307	OVER	0.358293	1	F1PGS2
GO:0010975	regulation of neuron projection development	P	1	6	1.96078	0.868307	OVER	0.358293	1	F1P8T3
GO:0051172	negative regulation of nitrogen compound metabolic process	P	1	6	1.96078	0.868307	OVER	0.358293	1	J9NVE9
GO:0001503	ossification	P	1	6	1.96078	0.868307	OVER	0.358293	1	F1P8T3
GO:0022804	active transmembrane transporter activity	F	1	6	1.96078	0.868307	OVER	0.358293	1	Q0QEN2
GO:0045664	regulation of neuron differentiation	P	1	6	1.96078	0.868307	OVER	0.358293	1	F1P8T3
GO:0051050	positive regulation of transport	P	1	6	1.96078	0.868307	OVER	0.358293	1	F1PGS2
GO:1902679	negative regulation of RNA biosynthetic process	P	1	6	1.96078	0.868307	OVER	0.358293	1	J9NVE9
GO:0030195	negative regulation of blood coagulation	P	1	6	1.96078	0.868307	OVER	0.358293	1	F1PGS2
GO:1990234	transferase complex	C	1	6	1.96078	0.868307	OVER	0.358293	1	E2RL75
GO:1903507	negative regulation of nucleic acid-templated transcription	P	1	6	1.96078	0.868307	OVER	0.358293	1	J9NVE9
GO:0007160	cell-matrix adhesion	P	1	6	1.96078	0.868307	OVER	0.358293	1	F1PGS2
GO:0016459	myosin complex	C	1	6	1.96078	0.868307	OVER	0.358293	1	J9NU17
GO:0045333	cellular respiration	P	1	6	1.96078	0.868307	OVER	0.358293	1	C4MW55
GO:0045934	negative regulation of nucleobase-containing compound metabolic process	P	1	6	1.96078	0.868307	OVER	0.358293	1	J9NVE9
GO:0009894	regulation of catabolic process	P	1	6	1.96078	0.868307	OVER	0.358293	1	J9NVE9
GO:0005996	monosaccharide metabolic process	P	2	18	3.92157	2.60492	OVER	0.37001	1	E2R2C3, J9NU05
GO:0016051	carbohydrate biosynthetic process	P	2	18	3.92157	2.60492	OVER	0.37001	1	E2R2C3, J9NU05
GO:0006812	cation transport	P	2	18	3.92157	2.60492	OVER	0.37001	1	C4MW55, Q0QEN2
GO:0044877	macromolecular complex binding	F	0	20	0	2.89436	UNDER	0.387745	1
GO:0051674	localization of cell	P	0	19	0	2.74964	UNDER	0.387888	1
GO:0048870	cell motility	P	0	19	0	2.74964	UNDER	0.387888	1
GO:0032403	protein complex binding	F	0	19	0	2.74964	UNDER	0.387888	1
GO:0016477	cell migration	P	0	19	0	2.74964	UNDER	0.387888	1
GO:0009057	macromolecule catabolic process	P	0	21	0	3.03907	UNDER	0.389481	1
GO:0050790	regulation of catalytic activity	P	0	22	0	3.18379	UNDER	0.392926	1
GO:0006909	phagocytosis	P	0	22	0	3.18379	UNDER	0.392926	1
GO:1901363	heterocyclic compound binding	F	9	98	17.6471	14.1823	OVER	0.394343	1	P60529, J9NU17, J9JHF7, P60524, F1PYZ1, F1PP21, J9JHZ3, F1PGC3, Q0QEN2
GO:0097159	organic cyclic compound binding	F	9	99	17.6471	14.3271	OVER	0.397933	1	P60529, J9NU17, J9JHF7, P60524, F1PYZ1, F1PP21, J9JHZ3, F1PGC3, Q0QEN2
GO:0032102	negative regulation of response to external stimulus	P	1	7	1.96078	1.01302	OVER	0.404266	1	F1PGS2
GO:0071345	cellular response to cytokine stimulus	P	1	7	1.96078	1.01302	OVER	0.404266	1	F1PGC3
GO:0003774	motor activity	F	1	7	1.96078	1.01302	OVER	0.404266	1	J9NU17
GO:0009069	serine family amino acid metabolic process	P	1	7	1.96078	1.01302	OVER	0.404266	1	J9NU05
GO:0001558	regulation of cell growth	P	1	7	1.96078	1.01302	OVER	0.404266	1	F1P8T3
GO:0009617	response to bacterium	P	1	7	1.96078	1.01302	OVER	0.404266	1	F1PGS2
GO:0016049	cell growth	P	1	7	1.96078	1.01302	OVER	0.404266	1	F1P8T3
GO:0034097	response to cytokine	P	1	7	1.96078	1.01302	OVER	0.404266	1	F1PGC3
GO:0010720	positive regulation of cell development	P	1	7	1.96078	1.01302	OVER	0.404266	1	F1P8T3
GO:0000904	cell morphogenesis involved in differentiation	P	1	7	1.96078	1.01302	OVER	0.404266	1	F1P8T3
GO:0034660	ncRNA metabolic process	P	1	7	1.96078	1.01302	OVER	0.404266	1	E2RL75
GO:1903035	negative regulation of response to wounding	P	1	7	1.96078	1.01302	OVER	0.404266	1	F1PGS2
GO:0040008	regulation of growth	P	1	7	1.96078	1.01302	OVER	0.404266	1	F1P8T3
GO:0031327	negative regulation of cellular biosynthetic process	P	1	7	1.96078	1.01302	OVER	0.404266	1	J9NVE9
GO:0007267	cell-cell signaling	P	1	7	1.96078	1.01302	OVER	0.404266	1	F1PGS2
GO:0045454	cell redox homeostasis	P	1	7	1.96078	1.01302	OVER	0.404266	1	J9NWJ5
GO:0010558	negative regulation of macromolecule biosynthetic process	P	1	7	1.96078	1.01302	OVER	0.404266	1	J9NVE9
GO:0044242	cellular lipid catabolic process	P	1	7	1.96078	1.01302	OVER	0.404266	1	J9NVE9
GO:0050819	negative regulation of coagulation	P	1	7	1.96078	1.01302	OVER	0.404266	1	F1PGS2
GO:0009890	negative regulation of biosynthetic process	P	1	7	1.96078	1.01302	OVER	0.404266	1	J9NVE9
GO:0009887	organ morphogenesis	P	1	7	1.96078	1.01302	OVER	0.404266	1	F1PP21
GO:0004866	endopeptidase inhibitor activity	F	0	24	0	3.47323	UNDER	0.404309	1
GO:0061135	endopeptidase regulator activity	F	0	24	0	3.47323	UNDER	0.404309	1
GO:0071944	cell periphery	C	5	52	9.80392	7.52533	OVER	0.404491	1	F1P8T3, J9NU17, F1Q0N9, F6X5M3, F1PGS2
GO:0042060	wound healing	P	3	25	5.88235	3.61795	OVER	0.411948	1	F1P8G0, F1PBL4, F1PGS2
GO:0032268	regulation of cellular protein metabolic process	P	3	25	5.88235	3.61795	OVER	0.411948	1	F1P8T3, J9NVE9, F1PGS2
GO:0046872	metal ion binding	F	10	109	19.6078	15.7742	OVER	0.413325	1	C4MW55, P60529, J9JHF7, P60524, J9NYN2, F1PYZ1, E2RH23, F1PP21, J9JHZ3, F1PBK6
GO:0036094	small molecule binding	F	2	55	3.92157	7.95948	UNDER	0.415541	1	J9NU17, Q0QEN2
GO:0043168	anion binding	F	2	57	3.92157	8.24891	UNDER	0.417067	1	J9NU17, Q0QEN2
GO:0043169	cation binding	F	10	112	19.6078	16.2084	OVER	0.420399	1	C4MW55, P60529, J9JHF7, P60524, J9NYN2, F1PYZ1, E2RH23, F1PP21, J9JHZ3, F1PBK6
GO:0010604	positive regulation of macromolecule metabolic process	P	3	26	5.88235	3.76266	OVER	0.420701	1	F1P8T3, J9NVE9, F1PGS2
GO:0048513	organ development	P	3	26	5.88235	3.76266	OVER	0.420701	1	F1P8T3, F1PP21, J9NVT1
GO:0010646	regulation of cell communication	P	3	27	5.88235	3.90738	OVER	0.430437	1	F1P8T3, J9NVE9, F1PGS2
GO:0023051	regulation of signaling	P	3	27	5.88235	3.90738	OVER	0.430437	1	F1P8T3, J9NVE9, F1PGS2
GO:0050878	regulation of body fluid levels	P	3	27	5.88235	3.90738	OVER	0.430437	1	F1P8G0, F1PBL4, F1PGS2
GO:0043232	intracellular non-membrane-bounded organelle	C	6	62	11.7647	8.9725	OVER	0.432059	1	J9NU17, F1PTY1, E2REU6, F1Q0N9, E2R489, J9NWS3
GO:0043228	non-membrane-bounded organelle	C	6	62	11.7647	8.9725	OVER	0.432059	1	J9NU17, F1PTY1, E2REU6, F1Q0N9, E2R489, J9NWS3
GO:0051716	cellular response to stimulus	P	6	121	11.7647	17.5109	UNDER	0.433675	1	F1P8T3, F1P8G0, J9NVE9, F1PBL4, F1PGS2, F1PGC3
GO:0044260	cellular macromolecule metabolic process	P	6	121	11.7647	17.5109	UNDER	0.433675	1	F1P8T3, E2RL75, E2R2C3, J9NVE9, Q9MZD3, F1PGS2
GO:0043226	organelle	C	20	242	39.2157	35.0217	OVER	0.435066	1	J9PB81, J9NU17, E2R7Z9, F1PTY1, E2RL75, E2REU6, J9NYN2, F1Q0N9, E2RH23, F1PH83, F1PEH9, F6X5M3, F1P6P2, E2R489, Q9MZD3, F1PGS2, J9NWJ5, F1PBK6, J9NWS3, Q0QEN2
GO:0031012	extracellular matrix	C	3	28	5.88235	4.0521	OVER	0.441036	1	F1P6H7, F1PF31, F1Q432
GO:0031325	positive regulation of cellular metabolic process	P	3	28	5.88235	4.0521	OVER	0.441036	1	F1P8T3, J9NVE9, F1PGS2
GO:0050767	regulation of neurogenesis	P	1	8	1.96078	1.15774	OVER	0.447009	1	F1P8T3
GO:0098662	inorganic cation transmembrane transport	P	1	8	1.96078	1.15774	OVER	0.447009	1	Q0QEN2
GO:0098660	inorganic ion transmembrane transport	P	1	8	1.96078	1.15774	OVER	0.447009	1	Q0QEN2
GO:0098655	cation transmembrane transport	P	1	8	1.96078	1.15774	OVER	0.447009	1	Q0QEN2
GO:0031589	cell-substrate adhesion	P	1	8	1.96078	1.15774	OVER	0.447009	1	F1PGS2
GO:0006396	RNA processing	P	1	8	1.96078	1.15774	OVER	0.447009	1	E2RL75
GO:0060341	regulation of cellular localization	P	1	8	1.96078	1.15774	OVER	0.447009	1	F1PGS2
GO:0048812	neuron projection morphogenesis	P	1	8	1.96078	1.15774	OVER	0.447009	1	F1P8T3
GO:0016616	oxidoreductase activity, acting on the CH-OH group of donors, NAD or NADP as acceptor	F	1	8	1.96078	1.15774	OVER	0.447009	1	J9NU05
GO:0016614	oxidoreductase activity, acting on CH-OH group of donors	F	1	8	1.96078	1.15774	OVER	0.447009	1	J9NU05
GO:0005739	mitochondrion	C	1	8	1.96078	1.15774	OVER	0.447009	1	Q0QEN2
GO:0022604	regulation of cell morphogenesis	P	1	8	1.96078	1.15774	OVER	0.447009	1	F1P8T3
GO:0019216	regulation of lipid metabolic process	P	1	8	1.96078	1.15774	OVER	0.447009	1	J9NVE9
GO:0030155	regulation of cell adhesion	P	1	8	1.96078	1.15774	OVER	0.447009	1	F1PGS2
GO:0001817	regulation of cytokine production	P	1	8	1.96078	1.15774	OVER	0.447009	1	F1PP21
GO:0001816	cytokine production	P	1	8	1.96078	1.15774	OVER	0.447009	1	F1PP21
GO:0046434	organophosphate catabolic process	P	1	8	1.96078	1.15774	OVER	0.447009	1	F1PPB6
GO:0051960	regulation of nervous system development	P	1	8	1.96078	1.15774	OVER	0.447009	1	F1P8T3
GO:0016337	single organismal cell-cell adhesion	P	1	8	1.96078	1.15774	OVER	0.447009	1	F1PGS2
GO:0012505	endomembrane system	C	3	29	5.88235	4.19682	OVER	0.452383	1	F1PH83, F6X5M3, F1PGS2
GO:0022607	cellular component assembly	P	3	29	5.88235	4.19682	OVER	0.452383	1	F1P8G0, F1PBL4, F1PGS2
GO:0016491	oxidoreductase activity	F	3	29	5.88235	4.19682	OVER	0.452383	1	C4MW55, J9NU05, J9NWJ5
GO:0048519	negative regulation of biological process	P	3	70	5.88235	10.1302	UNDER	0.462451	1	F1PP21, J9NVE9, F1PGS2
GO:0051246	regulation of protein metabolic process	P	3	30	5.88235	4.34153	OVER	0.464372	1	F1P8T3, J9NVE9, F1PGS2
GO:0009611	response to wounding	P	3	30	5.88235	4.34153	OVER	0.464372	1	F1P8G0, F1PBL4, F1PGS2
GO:0044459	plasma membrane part	C	3	30	5.88235	4.34153	OVER	0.464372	1	J9NU17, F6X5M3, F1PGS2
GO:0022610	biological adhesion	P	3	30	5.88235	4.34153	OVER	0.464372	1	F1P6H7, F1PF31, F1PGS2
GO:0007155	cell adhesion	P	3	30	5.88235	4.34153	OVER	0.464372	1	F1P6H7, F1PF31, F1PGS2
GO:0046483	heterocycle metabolic process	P	7	76	13.7255	10.9986	OVER	0.474196	1	C4MW55, F1PPB6, E2RL75, E2R2C3, J9NVE9, J9NU05, Q0QEN2
GO:0006725	cellular aromatic compound metabolic process	P	7	77	13.7255	11.1433	OVER	0.477812	1	C4MW55, F1PPB6, E2RL75, E2R2C3, J9NVE9, J9NU05, Q0QEN2
GO:0007600	sensory perception	P	1	9	1.96078	1.30246	OVER	0.486745	1	J9NU17
GO:0098602	single organism cell adhesion	P	1	9	1.96078	1.30246	OVER	0.486745	1	F1PGS2
GO:0034220	ion transmembrane transport	P	1	9	1.96078	1.30246	OVER	0.486745	1	Q0QEN2
GO:0045597	positive regulation of cell differentiation	P	1	9	1.96078	1.30246	OVER	0.486745	1	F1P8T3
GO:0031344	regulation of cell projection organization	P	1	9	1.96078	1.30246	OVER	0.486745	1	F1P8T3
GO:0030198	extracellular matrix organization	P	1	9	1.96078	1.30246	OVER	0.486745	1	F1Q432
GO:0044262	cellular carbohydrate metabolic process	P	1	9	1.96078	1.30246	OVER	0.486745	1	E2R2C3
GO:0015980	energy derivation by oxidation of organic compounds	P	1	9	1.96078	1.30246	OVER	0.486745	1	C4MW55
GO:0042623	ATPase activity, coupled	F	1	9	1.96078	1.30246	OVER	0.486745	1	Q0QEN2
GO:0050877	neurological system process	P	1	9	1.96078	1.30246	OVER	0.486745	1	J9NU17
GO:0043062	extracellular structure organization	P	1	9	1.96078	1.30246	OVER	0.486745	1	F1Q432
GO:0009893	positive regulation of metabolic process	P	3	32	5.88235	4.63097	OVER	0.489887	1	F1P8T3, J9NVE9, F1PGS2
GO:0006950	response to stress	P	4	83	7.84314	12.0116	UNDER	0.497589	1	F1P8G0, J9NVE9, F1PBL4, F1PGS2
GO:0044767	single-organism developmental process	P	4	85	7.84314	12.301	UNDER	0.498038	1	F1P8T3, F1P6H7, F1PP21, J9NVT1
GO:0032502	developmental process	P	4	86	7.84314	12.4457	UNDER	0.498925	1	F1P8T3, F1P6H7, F1PP21, J9NVT1
GO:0010556	regulation of macromolecule biosynthetic process	P	1	34	1.96078	4.92041	UNDER	0.502297	1	J9NVE9
GO:0044428	nuclear part	C	1	33	1.96078	4.77569	UNDER	0.502962	1	E2RL75
GO:0070013	intracellular organelle lumen	C	1	36	1.96078	5.20984	UNDER	0.504009	1	E2RL75
GO:0031974	membrane-enclosed lumen	C	1	36	1.96078	5.20984	UNDER	0.504009	1	E2RL75
GO:0043233	organelle lumen	C	1	36	1.96078	5.20984	UNDER	0.504009	1	E2RL75
GO:0051171	regulation of nitrogen compound metabolic process	P	1	37	1.96078	5.35456	UNDER	0.506275	1	J9NVE9
GO:0006996	organelle organization	P	1	37	1.96078	5.35456	UNDER	0.506275	1	E2R357
GO:0031326	regulation of cellular biosynthetic process	P	1	37	1.96078	5.35456	UNDER	0.506275	1	J9NVE9
GO:0009889	regulation of biosynthetic process	P	1	39	1.96078	5.64399	UNDER	0.513344	1	J9NVE9
GO:0051270	regulation of cellular component movement	P	1	10	1.96078	1.44718	OVER	0.523681	1	F1P8T3
GO:0072562	blood microparticle	C	1	10	1.96078	1.44718	OVER	0.523681	1	F1PGS2
GO:1901137	carbohydrate derivative biosynthetic process	P	1	10	1.96078	1.44718	OVER	0.523681	1	Q0QEN2
GO:1900046	regulation of hemostasis	P	1	10	1.96078	1.44718	OVER	0.523681	1	F1PGS2
GO:0098588	bounding membrane of organelle	C	1	10	1.96078	1.44718	OVER	0.523681	1	F6X5M3
GO:0060284	regulation of cell development	P	1	10	1.96078	1.44718	OVER	0.523681	1	F1P8T3
GO:0040012	regulation of locomotion	P	1	10	1.96078	1.44718	OVER	0.523681	1	F1P8T3
GO:0040007	growth	P	1	10	1.96078	1.44718	OVER	0.523681	1	F1P8T3
GO:0010629	negative regulation of gene expression	P	1	10	1.96078	1.44718	OVER	0.523681	1	J9NVE9
GO:0030193	regulation of blood coagulation	P	1	10	1.96078	1.44718	OVER	0.523681	1	F1PGS2
GO:0009986	cell surface	C	1	10	1.96078	1.44718	OVER	0.523681	1	F1PGS2
GO:0005578	proteinaceous extracellular matrix	C	1	10	1.96078	1.44718	OVER	0.523681	1	F1Q432
GO:0023052	signaling	P	5	98	9.80392	14.1823	UNDER	0.525162	1	F1P8T3, F1P8G0, J9NVE9, F1PBL4, F1PGS2
GO:0007154	cell communication	P	5	99	9.80392	14.3271	UNDER	0.525462	1	F1P8T3, F1P8G0, J9NVE9, F1PBL4, F1PGS2
GO:0044700	single organism signaling	P	5	96	9.80392	13.8929	UNDER	0.525709	1	F1P8T3, F1P8G0, J9NVE9, F1PBL4, F1PGS2
GO:0009987	cellular process	P	26	400	50.9804	57.8871	UNDER	0.542633	1	C4MW55, F1PDY8, E2R5U8, F1P8T3, F1PPB6, F1P6H7, E2R7Z9, E2RL75, E2REU6, F1PF31, E2R2C3, F1P8G0, F1PH83, F1PP21, J9NVE9, F1PBL4, J9NU05, Q9MZD3, F1PGS2, J9NVT1, F1Q432, E2R357, J9NWJ5, F1PBK6, F1PGC3, Q0QEN2
GO:0005515	protein binding	F	20	313	39.2157	45.2967	UNDER	0.550105	1	E2R5U8, F1P8T3, J9P0D4, F1P6H7, J9NU17, F1PF31, F1P8A6, E2RH23, F1P8G0, E2RP87, F1PBL4, F6X5M3, F1P6P2, J9P9B9, F1PGS2, J9NVT1, F1Q432, F1PBK6, F1PGC3, J9NYI6
GO:0006464	cellular protein modification process	P	4	45	7.84314	6.5123	OVER	0.550812	1	F1P8T3, J9NVE9, Q9MZD3, F1PGS2
GO:0036211	protein modification process	P	4	45	7.84314	6.5123	OVER	0.550812	1	F1P8T3, J9NVE9, Q9MZD3, F1PGS2
GO:0016887	ATPase activity	F	1	11	1.96078	1.5919	OVER	0.55801	1	Q0QEN2
GO:1901615	organic hydroxy compound metabolic process	P	1	11	1.96078	1.5919	OVER	0.55801	1	E2R5U8
GO:0042981	regulation of apoptotic process	P	1	11	1.96078	1.5919	OVER	0.55801	1	F1PGS2
GO:0016042	lipid catabolic process	P	1	11	1.96078	1.5919	OVER	0.55801	1	J9NVE9
GO:0048858	cell projection morphogenesis	P	1	11	1.96078	1.5919	OVER	0.55801	1	F1P8T3
GO:0032990	cell part morphogenesis	P	1	11	1.96078	1.5919	OVER	0.55801	1	F1P8T3
GO:0006066	alcohol metabolic process	P	1	11	1.96078	1.5919	OVER	0.55801	1	E2R5U8
GO:0050818	regulation of coagulation	P	1	11	1.96078	1.5919	OVER	0.55801	1	F1PGS2
GO:0043067	regulation of programmed cell death	P	1	11	1.96078	1.5919	OVER	0.55801	1	F1PGS2
GO:0031090	organelle membrane	C	1	11	1.96078	1.5919	OVER	0.55801	1	F6X5M3
GO:0043412	macromolecule modification	P	4	46	7.84314	6.65702	OVER	0.558865	1	F1P8T3, J9NVE9, Q9MZD3, F1PGS2
GO:0003676	nucleic acid binding	F	2	48	3.92157	6.94645	UNDER	0.566719	1	F1PP21, F1PGC3
GO:0097367	carbohydrate derivative binding	F	2	51	3.92157	7.38061	UNDER	0.568788	1	J9NU17, Q0QEN2
GO:0061041	regulation of wound healing	P	1	12	1.96078	1.73661	OVER	0.589913	1	F1PGS2
GO:0051094	positive regulation of developmental process	P	1	12	1.96078	1.73661	OVER	0.589913	1	F1P8T3
GO:0072359	circulatory system development	P	1	12	1.96078	1.73661	OVER	0.589913	1	F1PP21
GO:0072358	cardiovascular system development	P	1	12	1.96078	1.73661	OVER	0.589913	1	F1PP21
GO:0006954	inflammatory response	P	1	12	1.96078	1.73661	OVER	0.589913	1	J9NVE9
GO:0042995	cell projection	C	1	12	1.96078	1.73661	OVER	0.589913	1	J9NU17
GO:0052689	carboxylic ester hydrolase activity	F	1	12	1.96078	1.73661	OVER	0.589913	1	F1PBK6
GO:0042127	regulation of cell proliferation	P	1	12	1.96078	1.73661	OVER	0.589913	1	F1PF31
GO:0048666	neuron development	P	1	12	1.96078	1.73661	OVER	0.589913	1	F1P8T3
GO:0031175	neuron projection development	P	1	12	1.96078	1.73661	OVER	0.589913	1	F1P8T3
GO:0070062	extracellular exosome	C	3	61	5.88235	8.82779	UNDER	0.609809	1	E2R7Z9, F1PGS2, F1PBK6
GO:0065010	extracellular membrane-bounded organelle	C	3	61	5.88235	8.82779	UNDER	0.609809	1	E2R7Z9, F1PGS2, F1PBK6
GO:0043230	extracellular organelle	C	3	61	5.88235	8.82779	UNDER	0.609809	1	E2R7Z9, F1PGS2, F1PBK6
GO:1903561	extracellular vesicle	C	3	61	5.88235	8.82779	UNDER	0.609809	1	E2R7Z9, F1PGS2, F1PBK6
GO:0007275	multicellular organismal development	P	3	65	5.88235	9.40666	UNDER	0.610465	1	F1P8T3, F1PP21, J9NVT1
GO:0044249	cellular biosynthetic process	P	3	66	5.88235	9.55137	UNDER	0.611795	1	E2R7Z9, J9NVE9, Q0QEN2
GO:0004298	threonine-type endopeptidase activity	F	0	14	0	2.02605	UNDER	0.614394	1
GO:0016773	phosphotransferase activity, alcohol group as acceptor	F	0	14	0	2.02605	UNDER	0.614394	1
GO:0015630	microtubule cytoskeleton	C	0	14	0	2.02605	UNDER	0.614394	1
GO:0005839	proteasome core complex	C	0	14	0	2.02605	UNDER	0.614394	1
GO:0006869	lipid transport	P	0	14	0	2.02605	UNDER	0.614394	1
GO:0070003	threonine-type peptidase activity	F	0	14	0	2.02605	UNDER	0.614394	1
GO:0030054	cell junction	C	0	14	0	2.02605	UNDER	0.614394	1
GO:0038023	signaling receptor activity	F	0	13	0	1.88133	UNDER	0.614617	1
GO:1901700	response to oxygen-containing compound	P	0	13	0	1.88133	UNDER	0.614617	1
GO:0009719	response to endogenous stimulus	P	0	13	0	1.88133	UNDER	0.614617	1
GO:0051336	regulation of hydrolase activity	P	0	13	0	1.88133	UNDER	0.614617	1
GO:0030001	metal ion transport	P	0	13	0	1.88133	UNDER	0.614617	1
GO:0007049	cell cycle	P	0	13	0	1.88133	UNDER	0.614617	1
GO:0000502	proteasome complex	C	0	15	0	2.17077	UNDER	0.616183	1
GO:0010876	lipid localization	P	0	15	0	2.17077	UNDER	0.616183	1
GO:0005887	integral component of plasma membrane	C	0	15	0	2.17077	UNDER	0.616183	1
GO:0002252	immune effector process	P	0	15	0	2.17077	UNDER	0.616183	1
GO:0016301	kinase activity	F	0	15	0	2.17077	UNDER	0.616183	1
GO:0008092	cytoskeletal protein binding	F	0	16	0	2.31548	UNDER	0.619705	1
GO:0004871	signal transducer activity	F	0	16	0	2.31548	UNDER	0.619705	1
GO:0051603	proteolysis involved in cellular protein catabolic process	P	0	16	0	2.31548	UNDER	0.619705	1
GO:0031226	intrinsic component of plasma membrane	C	0	16	0	2.31548	UNDER	0.619705	1
GO:0044257	cellular protein catabolic process	P	0	16	0	2.31548	UNDER	0.619705	1
GO:0007010	cytoskeleton organization	P	0	16	0	2.31548	UNDER	0.619705	1
GO:0044265	cellular macromolecule catabolic process	P	0	17	0	2.4602	UNDER	0.624711	1
GO:0005488	binding	F	31	460	60.7843	66.5702	UNDER	0.630786	1	C4MW55, E2R5U8, F1P8T3, J9P0D4, P60529, F1P6H7, J9NU17, J9JHF7, P60524, E2R7Z9, E2RL75, F1PF31, F1P8A6, J9NYN2, F1PYZ1, E2RH23, F1P8G0, F1PP21, E2RP87, F1PBL4, F6X5M3, F1P6P2, J9P9B9, F1PGS2, J9NVT1, J9JHZ3, F1Q432, F1PBK6, F1PGC3, J9NYI6, Q0QEN2
GO:0016772	transferase activity, transferring phosphorus-containing groups	F	0	18	0	2.60492	UNDER	0.630976	1
GO:0048878	chemical homeostasis	P	0	18	0	2.60492	UNDER	0.630976	1
GO:0030163	protein catabolic process	P	0	18	0	2.60492	UNDER	0.630976	1
GO:0044255	cellular lipid metabolic process	P	2	19	3.92157	2.74964	OVER	0.638297	1	E2R5U8, J9NVE9
GO:0044267	cellular protein metabolic process	P	4	77	7.84314	11.1433	UNDER	0.639693	1	F1P8T3, J9NVE9, Q9MZD3, F1PGS2
GO:0032787	monocarboxylic acid metabolic process	P	2	20	3.92157	2.89436	OVER	0.646497	1	E2R2C3, J9NU05
GO:0048468	cell development	P	2	20	3.92157	2.89436	OVER	0.646497	1	F1P8T3, F1PP21
GO:0022892	substrate-specific transporter activity	F	2	20	3.92157	2.89436	OVER	0.646497	1	C4MW55, Q0QEN2
GO:0071704	organic substance metabolic process	P	17	265	33.3333	38.3502	UNDER	0.64688	1	J9PB81, C4MW55, E2R5U8, F1P8T3, F1PPB6, F1P6H7, E2R7Z9, E2RL75, E2R2C3, F1PP21, J9NVE9, J9NU05, Q9MZD3, F1PGS2, F1Q432, J9NWJ5, Q0QEN2
GO:0034641	cellular nitrogen compound metabolic process	P	7	85	13.7255	12.301	OVER	0.651476	1	C4MW55, F1PPB6, E2RL75, E2R2C3, J9NVE9, J9NU05, Q0QEN2
GO:1901360	organic cyclic compound metabolic process	P	7	85	13.7255	12.301	OVER	0.651476	1	C4MW55, F1PPB6, E2RL75, E2R2C3, J9NVE9, J9NU05, Q0QEN2
GO:0044283	small molecule biosynthetic process	P	2	21	3.92157	3.03907	OVER	0.655416	1	E2R2C3, J9NU05
GO:0016043	cellular component organization	P	7	88	13.7255	12.7352	OVER	0.660968	1	F1P8T3, F1P6H7, F1P8G0, F1PBL4, F1PGS2, F1Q432, E2R357
GO:0007165	signal transduction	P	5	92	9.80392	13.314	UNDER	0.66301	1	F1P8T3, F1P8G0, J9NVE9, F1PBL4, F1PGS2
GO:0006811	ion transport	P	2	22	3.92157	3.18379	OVER	0.66491	1	C4MW55, Q0QEN2
GO:0017111	nucleoside-triphosphatase activity	F	2	23	3.92157	3.32851	OVER	0.674855	1	J9NU17, Q0QEN2
GO:0016818	hydrolase activity, acting on acid anhydrides, in phosphorus-containing anhydrides	F	2	24	3.92157	3.47323	OVER	0.685138	1	J9NU17, Q0QEN2
GO:0016817	hydrolase activity, acting on acid anhydrides	F	2	24	3.92157	3.47323	OVER	0.685138	1	J9NU17, Q0QEN2
GO:0016788	hydrolase activity, acting on ester bonds	F	2	24	3.92157	3.47323	OVER	0.685138	1	E2R7Z9, F1PBK6
GO:0007399	nervous system development	P	2	24	3.92157	3.47323	OVER	0.685138	1	F1P8T3, F1PP21
GO:0016462	pyrophosphatase activity	F	2	24	3.92157	3.47323	OVER	0.685138	1	J9NU17, Q0QEN2
GO:0044707	single-multicellular organism process	P	7	117	13.7255	16.932	UNDER	0.696303	1	F1P8T3, J9NU17, F1P8G0, F1PP21, F1PBL4, F1PGS2, J9NVT1
GO:0044723	single-organism carbohydrate metabolic process	P	2	26	3.92157	3.76266	OVER	0.706339	1	E2R2C3, J9NU05
GO:0007166	cell surface receptor signaling pathway	P	2	26	3.92157	3.76266	OVER	0.706339	1	F1P8T3, F1PGS2
GO:0004252	serine-type endopeptidase activity	F	1	28	1.96078	4.0521	UNDER	0.713172	1	J9PB81
GO:0006355	regulation of transcription, DNA-templated	P	1	28	1.96078	4.0521	UNDER	0.713172	1	J9NVE9
GO:0017171	serine hydrolase activity	F	1	28	1.96078	4.0521	UNDER	0.713172	1	J9PB81
GO:0010033	response to organic substance	P	1	28	1.96078	4.0521	UNDER	0.713172	1	F1PGC3
GO:1903506	regulation of nucleic acid-templated transcription	P	1	28	1.96078	4.0521	UNDER	0.713172	1	J9NVE9
GO:0008236	serine-type peptidase activity	F	1	28	1.96078	4.0521	UNDER	0.713172	1	J9PB81
GO:0051128	regulation of cellular component organization	P	1	27	1.96078	3.90738	UNDER	0.713342	1	F1P8T3
GO:2001141	regulation of RNA biosynthetic process	P	1	29	1.96078	4.19682	UNDER	0.713795	1	J9NVE9
GO:0042592	homeostatic process	P	1	30	1.96078	4.34153	UNDER	0.715154	1	J9NWJ5
GO:0051252	regulation of RNA metabolic process	P	1	30	1.96078	4.34153	UNDER	0.715154	1	J9NVE9
GO:2000112	regulation of cellular macromolecule biosynthetic process	P	1	31	1.96078	4.48625	UNDER	0.717191	1	J9NVE9
GO:0006351	transcription, DNA-templated	P	1	31	1.96078	4.48625	UNDER	0.717191	1	J9NVE9
GO:0031981	nuclear lumen	C	1	31	1.96078	4.48625	UNDER	0.717191	1	E2RL75
GO:0097659	nucleic acid-templated transcription	P	1	31	1.96078	4.48625	UNDER	0.717191	1	J9NVE9
GO:0032774	RNA biosynthetic process	P	1	32	1.96078	4.63097	UNDER	0.719851	1	J9NVE9
GO:0019219	regulation of nucleobase-containing compound metabolic process	P	1	32	1.96078	4.63097	UNDER	0.719851	1	J9NVE9
GO:0044711	single-organism biosynthetic process	P	3	34	5.88235	4.92041	OVER	0.72682	1	E2R2C3, J9NU05, Q0QEN2
GO:0043229	intracellular organelle	C	13	167	25.4902	24.1679	OVER	0.728664	1	J9PB81, J9NU17, F1PTY1, E2RL75, E2REU6, F1Q0N9, E2RH23, F1PH83, F6X5M3, E2R489, F1PGS2, J9NWS3, Q0QEN2
GO:0033036	macromolecule localization	P	3	36	5.88235	5.20984	OVER	0.73564	1	F1PH83, F6X5M3, F1PGS2
GO:0043227	membrane-bounded organelle	C	12	190	23.5294	27.4964	UNDER	0.739588	1	J9PB81, E2R7Z9, E2RL75, J9NYN2, E2RH23, F1PH83, F6X5M3, Q9MZD3, F1PGS2, J9NWJ5, F1PBK6, Q0QEN2
GO:0044085	cellular component biogenesis	P	3	39	5.88235	5.64399	OVER	0.751495	1	F1P8G0, F1PBL4, F1PGS2
GO:0006952	defense response	P	2	42	3.92157	6.07815	UNDER	0.759959	1	J9NVE9, F1PGS2
GO:0044271	cellular nitrogen compound biosynthetic process	P	2	43	3.92157	6.22287	UNDER	0.760271	1	J9NVE9, Q0QEN2
GO:0090304	nucleic acid metabolic process	P	2	44	3.92157	6.36758	UNDER	0.761019	1	E2RL75, J9NVE9
GO:0000166	nucleotide binding	F	2	44	3.92157	6.36758	UNDER	0.761019	1	J9NU17, Q0QEN2
GO:1901265	nucleoside phosphate binding	F	2	44	3.92157	6.36758	UNDER	0.761019	1	J9NU17, Q0QEN2
GO:0044699	single-organism process	P	29	388	56.8627	56.1505	OVER	0.762447	1	C4MW55, F1PDY8, E2R5U8, F1P8T3, F1PPB6, P60529, F1P6H7, J9NU17, J9JHF7, P60524, E2REU6, F1PF31, F1PYZ1, E2R2C3, F1P8G0, F1PP21, F1PEH9, J9NVE9, F1PBL4, J9NU05, F1PGS2, J9NVT1, J9JHZ3, F1Q432, E2R357, J9NWJ5, F1PBK6, J9NWS3, Q0QEN2
GO:0008152	metabolic process	P	19	286	37.2549	41.3893	UNDER	0.762793	1	J9PB81, C4MW55, E2R5U8, F1P8T3, F1PPB6, F1P6H7, E2R7Z9, E2RL75, E2R2C3, F1PP21, F1PEH9, J9NVE9, J9NU05, Q9MZD3, F1PGS2, F1Q432, J9NWJ5, F1PBK6, Q0QEN2
GO:0042221	response to chemical	P	4	49	7.84314	7.09117	OVER	0.770489	1	F1PDY8, J9NVE9, F1PGS2, F1PGC3
GO:0005886	plasma membrane	C	4	50	7.84314	7.23589	OVER	0.773363	1	F1P8T3, J9NU17, F6X5M3, F1PGS2
GO:1901575	organic substance catabolic process	P	4	52	7.84314	7.52533	OVER	0.779902	1	F1PPB6, E2R2C3, J9NVE9, J9NU05
GO:0010467	gene expression	P	4	53	7.84314	7.67004	OVER	0.78352	1	E2RL75, F1PP21, J9NVE9, F1PGS2
GO:0048731	system development	P	3	56	5.88235	8.1042	UNDER	0.788323	1	F1P8T3, F1PP21, J9NVT1
GO:1901564	organonitrogen compound metabolic process	P	5	65	9.80392	9.40666	OVER	0.799732	1	C4MW55, F1PPB6, E2R2C3, J9NU05, Q0QEN2
GO:0060255	regulation of macromolecule metabolic process	P	5	68	9.80392	9.84081	OVER	0.807564	1	F1P8T3, F1P6H7, F1PP21, J9NVE9, F1PGS2
GO:0080090	regulation of primary metabolic process	P	4	71	7.84314	10.275	UNDER	0.807806	1	F1P8T3, F1PP21, J9NVE9, F1PGS2
GO:0048856	anatomical structure development	P	4	74	7.84314	10.7091	UNDER	0.809466	1	F1P8T3, F1P6H7, F1PP21, J9NVT1
GO:0044425	membrane part	C	6	79	11.7647	11.4327	OVER	0.816205	1	C4MW55, F1P8T3, J9NU17, F6X5M3, F1PGS2, Q0QEN2
GO:0065008	regulation of biological quality	P	6	80	11.7647	11.5774	OVER	0.818072	1	E2R5U8, F1P8T3, F1P8G0, F1PBL4, F1PGS2, J9NWJ5
GO:0009058	biosynthetic process	P	5	84	9.80392	12.1563	UNDER	0.821891	1	E2R7Z9, E2R2C3, J9NVE9, J9NU05, Q0QEN2
GO:0019222	regulation of metabolic process	P	5	88	9.80392	12.7352	UNDER	0.823228	1	F1P8T3, F1P6H7, F1PP21, J9NVE9, F1PGS2
GO:0043231	intracellular membrane-bounded organelle	C	7	115	13.7255	16.6425	UNDER	0.841863	1	J9PB81, E2RL75, E2RH23, F1PH83, F6X5M3, F1PGS2, Q0QEN2
GO:0032501	multicellular organismal process	P	8	126	15.6863	18.2344	UNDER	0.848421	1	F1P8T3, J9NU17, F1P8G0, F1PP21, F1PBL4, F1PGS2, J9NVT1, E2R357
GO:0043167	ion binding	F	12	162	23.5294	23.4443	OVER	0.861364	1	C4MW55, P60529, J9NU17, J9JHF7, P60524, J9NYN2, F1PYZ1, E2RH23, F1PP21, J9JHZ3, F1PBK6, Q0QEN2
GO:0044763	single-organism cellular process	P	20	293	39.2157	42.4023	UNDER	0.880411	1	C4MW55, F1PDY8, E2R5U8, F1P8T3, F1PPB6, F1P6H7, E2REU6, E2R2C3, F1P8G0, F1PP21, J9NVE9, F1PBL4, J9NU05, F1PGS2, J9NVT1, F1Q432, E2R357, J9NWJ5, F1PBK6, Q0QEN2
GO:0006807	nitrogen compound metabolic process	P	8	111	15.6863	16.0637	OVER	1	1	C4MW55, F1PPB6, E2RL75, E2R2C3, J9NVE9, J9NU05, F1PBK6, Q0QEN2
GO:0051239	regulation of multicellular organismal process	P	3	41	5.88235	5.93343	OVER	1	1	F1P8T3, F1PP21, F1PGS2
GO:0009056	catabolic process	P	4	60	7.84314	8.68307	UNDER	1	1	F1PPB6, E2R2C3, J9NVE9, J9NU05
GO:0048523	negative regulation of cellular process	P	3	53	5.88235	7.67004	UNDER	1	1	F1PP21, J9NVE9, F1PGS2
GO:0030154	cell differentiation	P	2	33	3.92157	4.77569	UNDER	1	1	F1P8T3, F1PP21
GO:0032553	ribonucleotide binding	F	2	40	3.92157	5.78871	UNDER	1	1	J9NU17, Q0QEN2
GO:0016070	RNA metabolic process	P	2	40	3.92157	5.78871	UNDER	1	1	E2RL75, J9NVE9
GO:0050793	regulation of developmental process	P	1	25	1.96078	3.61795	UNDER	1	1	F1P8T3
GO:0071840	cellular component organization or biogenesis	P	7	96	13.7255	13.8929	OVER	1	1	F1P8T3, F1P6H7, F1P8G0, F1PBL4, F1PGS2, F1Q432, E2R357
GO:0031323	regulation of cellular metabolic process	P	4	68	7.84314	9.84081	UNDER	1	1	F1P8T3, F1PP21, J9NVE9, F1PGS2
GO:0031988	membrane-bounded vesicle	C	4	68	7.84314	9.84081	UNDER	1	1	E2R7Z9, F6X5M3, F1PGS2, F1PBK6
GO:1901576	organic substance biosynthetic process	P	5	79	9.80392	11.4327	UNDER	1	1	E2R7Z9, E2R2C3, J9NVE9, J9NU05, Q0QEN2
GO:0048869	cellular developmental process	P	2	36	3.92157	5.20984	UNDER	1	1	F1P8T3, F1PP21
GO:0030554	adenyl nucleotide binding	F	2	31	3.92157	4.48625	UNDER	1	1	J9NU17, Q0QEN2
GO:0032559	adenyl ribonucleotide binding	F	2	31	3.92157	4.48625	UNDER	1	1	J9NU17, Q0QEN2
GO:0005524	ATP binding	F	2	31	3.92157	4.48625	UNDER	1	1	J9NU17, Q0QEN2
GO:0032879	regulation of localization	P	2	30	3.92157	4.34153	UNDER	1	1	F1P8T3, F1PGS2
GO:0048584	positive regulation of response to stimulus	P	3	52	5.88235	7.52533	UNDER	1	1	F1P8T3, J9NVE9, F1PGS2
GO:0040011	locomotion	P	1	23	1.96078	3.32851	UNDER	1	1	F1P8T3
GO:0005215	transporter activity	F	2	27	3.92157	3.90738	OVER	1	1	C4MW55, Q0QEN2
GO:0031982	vesicle	C	5	73	9.80392	10.5644	UNDER	1	1	E2R7Z9, F6X5M3, F1P6P2, F1PGS2, F1PBK6
GO:0006082	organic acid metabolic process	P	2	38	3.92157	5.49928	UNDER	1	1	E2R2C3, J9NU05
GO:0010468	regulation of gene expression	P	2	38	3.92157	5.49928	UNDER	1	1	F1PP21, J9NVE9
GO:0005975	carbohydrate metabolic process	P	2	34	3.92157	4.92041	UNDER	1	1	E2R2C3, J9NU05
GO:0048518	positive regulation of biological process	P	8	123	15.6863	17.8003	UNDER	1	1	F1PDY8, F1P8T3, F1P6H7, F1P8G0, F1PP21, J9NVE9, F1PBL4, F1PGS2
GO:0055114	oxidation-reduction process	P	2	32	3.92157	4.63097	UNDER	1	1	C4MW55, J9NU05
GO:0006629	lipid metabolic process	P	2	32	3.92157	4.63097	UNDER	1	1	E2R5U8, J9NVE9
GO:0016192	vesicle-mediated transport	P	2	37	3.92157	5.35456	UNDER	1	1	F6X5M3, F1PGS2
GO:0019438	aromatic compound biosynthetic process	P	2	37	3.92157	5.35456	UNDER	1	1	J9NVE9, Q0QEN2
GO:0043436	oxoacid metabolic process	P	2	37	3.92157	5.35456	UNDER	1	1	E2R2C3, J9NU05
GO:0018130	heterocycle biosynthetic process	P	2	37	3.92157	5.35456	UNDER	1	1	J9NVE9, Q0QEN2
GO:1901362	organic cyclic compound biosynthetic process	P	2	37	3.92157	5.35456	UNDER	1	1	J9NVE9, Q0QEN2
GO:0009653	anatomical structure morphogenesis	P	2	35	3.92157	5.06512	UNDER	1	1	F1P8T3, F1PP21
GO:0034654	nucleobase-containing compound biosynthetic process	P	2	35	3.92157	5.06512	UNDER	1	1	J9NVE9, Q0QEN2
GO:0019752	carboxylic acid metabolic process	P	2	35	3.92157	5.06512	UNDER	1	1	E2R2C3, J9NU05
GO:0044248	cellular catabolic process	P	2	35	3.92157	5.06512	UNDER	1	1	F1PPB6, J9NVE9
GO:0032555	purine ribonucleotide binding	F	2	39	3.92157	5.64399	UNDER	1	1	J9NU17, Q0QEN2
GO:0032550	purine ribonucleoside binding	F	2	39	3.92157	5.64399	UNDER	1	1	J9NU17, Q0QEN2
GO:0032549	ribonucleoside binding	F	2	39	3.92157	5.64399	UNDER	1	1	J9NU17, Q0QEN2
GO:0017076	purine nucleotide binding	F	2	39	3.92157	5.64399	UNDER	1	1	J9NU17, Q0QEN2
GO:0035639	purine ribonucleoside triphosphate binding	F	2	39	3.92157	5.64399	UNDER	1	1	J9NU17, Q0QEN2
GO:0001883	purine nucleoside binding	F	2	39	3.92157	5.64399	UNDER	1	1	J9NU17, Q0QEN2
GO:0001882	nucleoside binding	F	2	39	3.92157	5.64399	UNDER	1	1	J9NU17, Q0QEN2
GO:0070887	cellular response to chemical stimulus	P	1	24	1.96078	3.47323	UNDER	1	1	F1PGC3
GO:0006928	movement of cell or subcellular component	P	1	24	1.96078	3.47323	UNDER	1	1	F1P8T3
GO:0009892	negative regulation of metabolic process	P	1	24	1.96078	3.47323	UNDER	1	1	J9NVE9
